# Supplementary material for: New design strategy for chemically-stable blue phosphorescent materials: improving the energy gap between the T1 and 3MC states
Source: Royal Society of Chemistry journal article supplement (doi:10.1039/c9cp05781a), 2021-01-01
Supplement: c9cp05781a1.pdf [file c9cp05781a1.pdf]

## Electronic Supplementary Information

### Table of Contents

**Fig. S1.** Huang-Rhys factors for Ir(III) and Pt(II) phosphorescent materials.

**Table S1.** The calculated  $T_1$  and  $^3MC$  energies of Ir(III) and Pt(II) phosphorescent materials by B3LYP/LANL2DZ with 6-311G\*\* and 6-311+G\*\* (with GD3).

**Table S2.** The cartesian coordinates of optimized structures in  $S_0$ ,  $T_1$ , and  $^3MC$  state of Ir(III) and Pt(II) phosphorescent materials.

**Fig S1.** Huang-Rhys factors for Ir(III) and Pt(II) phosphorescent materials.

*fac*-Ir(pmi)<sub>3</sub>

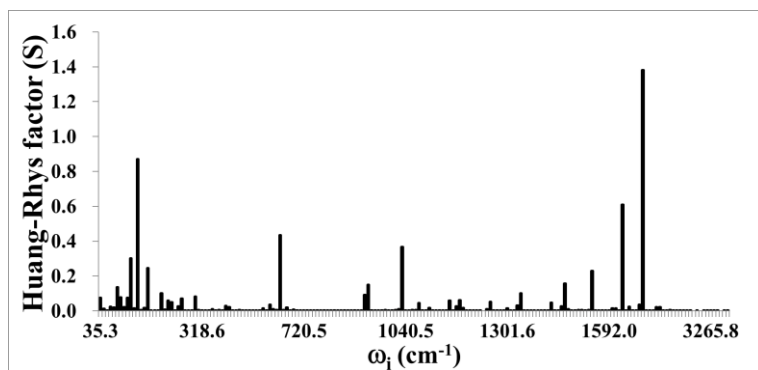

*fac* -Ir(pmb)<sub>3</sub>

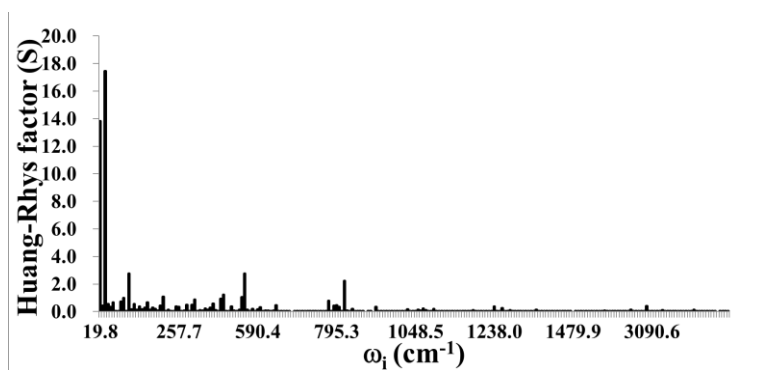

**Ir-C**

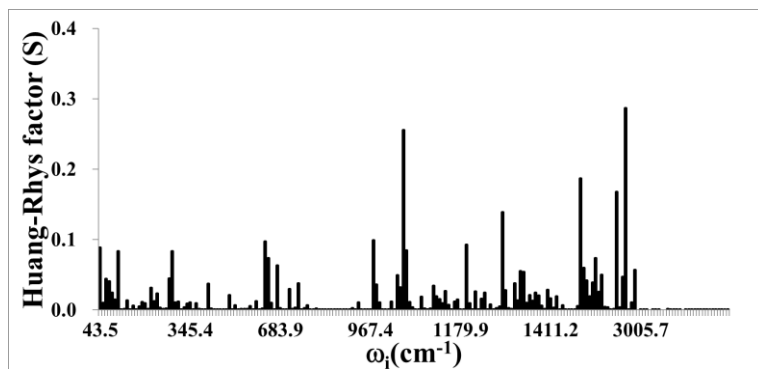

### Ir-N

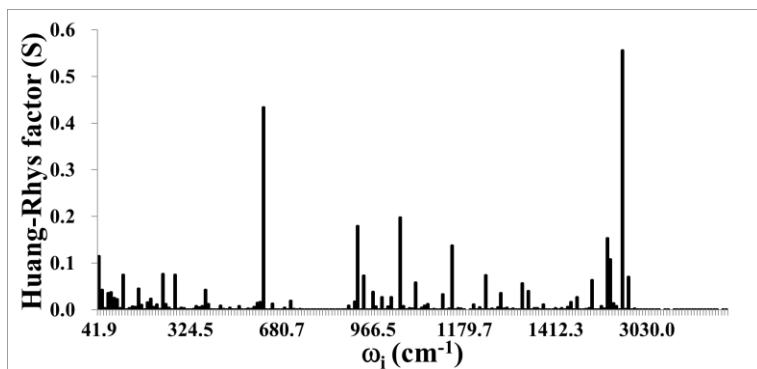

### Ir-Ph

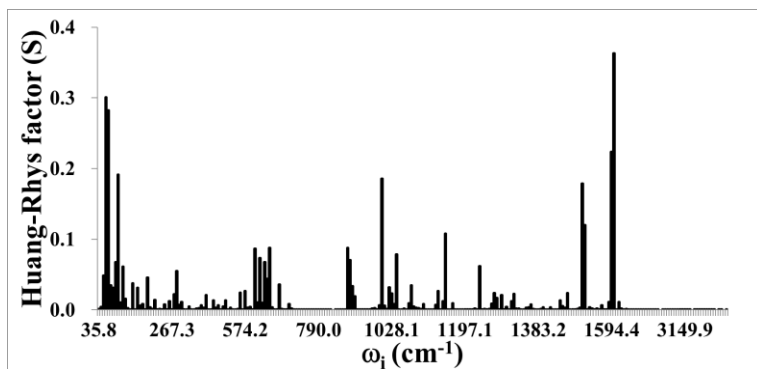

### Ir-N-CN

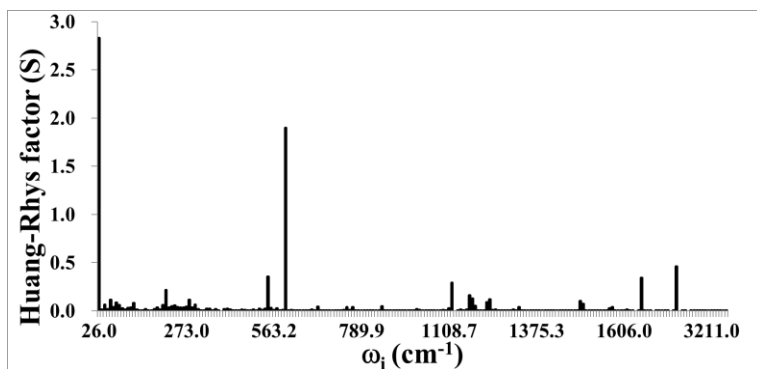

### Ir-N-F

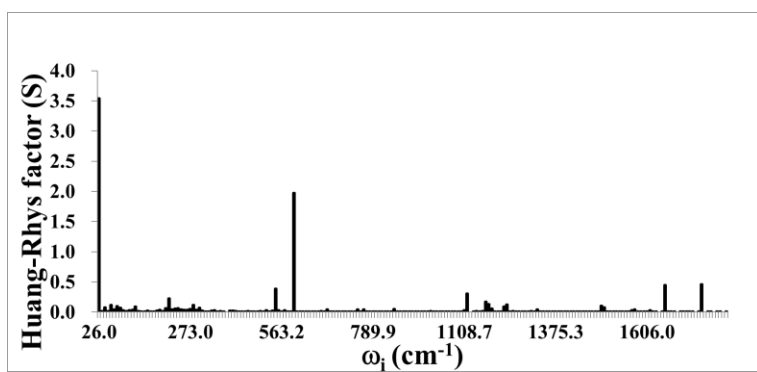

### Ir-N-Ph

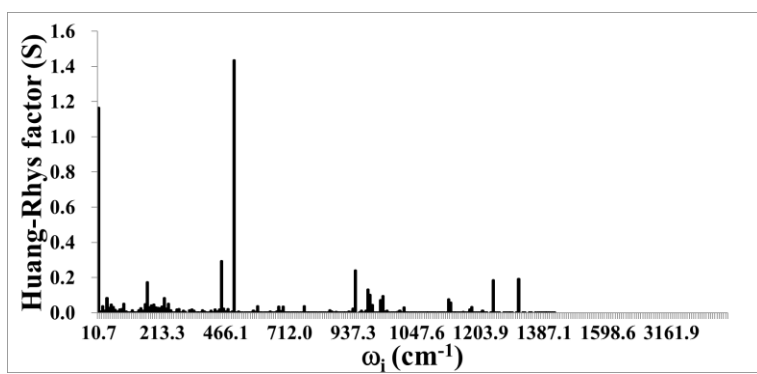

### HB-*fac*-Ir(pmi)<sub>3</sub>

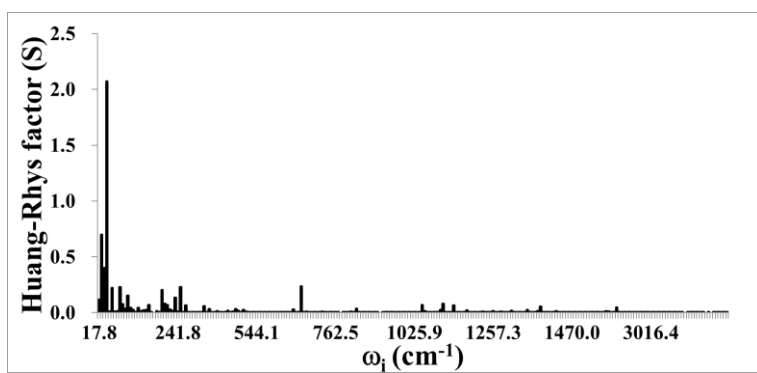

### HB-*fac*-Ir(pmiCN)<sub>3</sub>

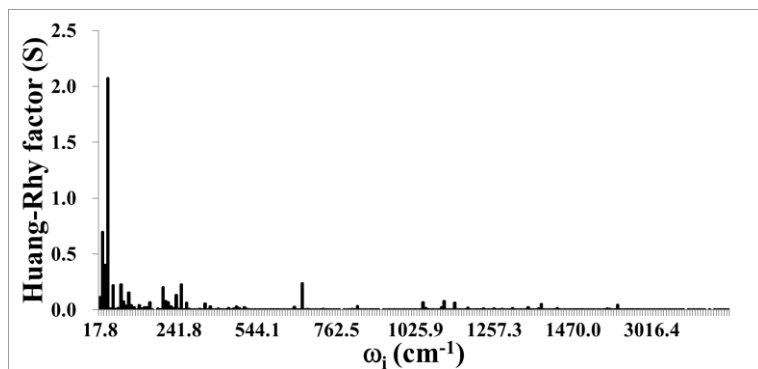

### Pt[*pti*-O-CbPy]

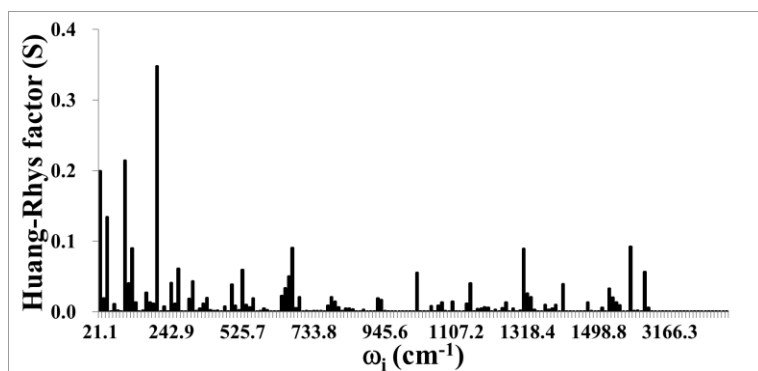

### Pt-IP

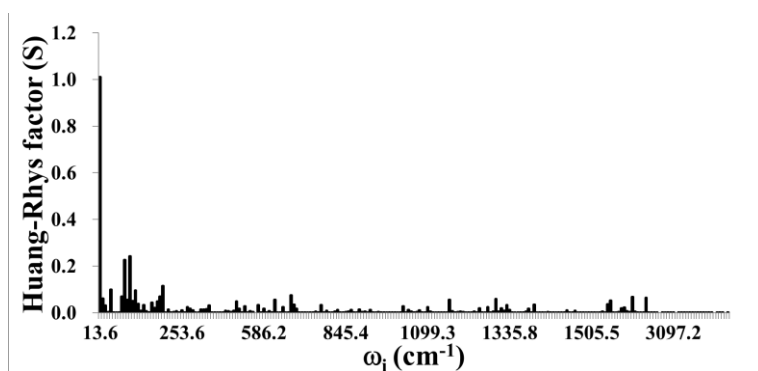

### Pt[*pti*-O-InPy]

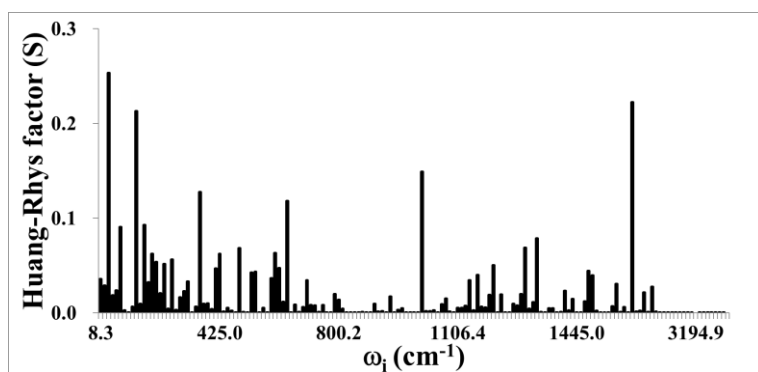

### Pt-In-H

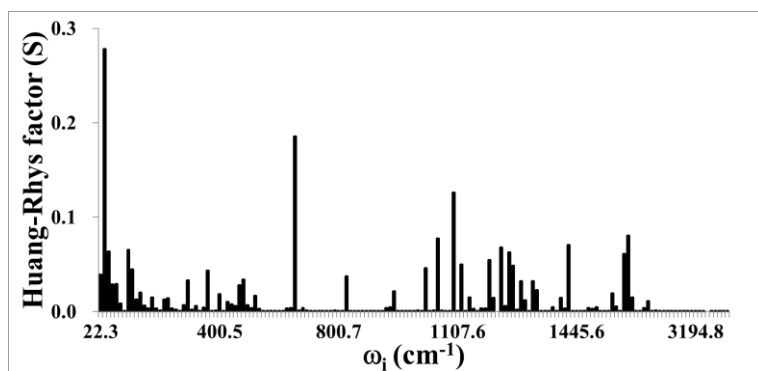

**Table S1.** The calculated  $T_1$  and  $^3MC$  energies of Ir(III) and Pt(II) phosphorescent materials by B3LYP/LANL2DZ with 6-311G\*\* and 6-311+G\*\* (with GD3).

|                                        | 6-311G**   |                   | 6-311+G** with GD3 |                   |
|----------------------------------------|------------|-------------------|--------------------|-------------------|
|                                        | $T_1$ (eV) | $^3MC$ (kcal/mol) | $T_1$ (eV)         | $^3MC$ (kcal/mol) |
| <i>fac</i> -Ir(pmi) <sub>3</sub>       | 3.28       | 1.88              | 3.26               | 1.77              |
| <i>fac</i> -Ir(pmb) <sub>3</sub>       | 3.15       | 3.28              | 3.09               | 3.72              |
| Ir-N                                   | 3.26       | 8.00              | 3.26               | 11.14             |
| Ir-C                                   | 3.26       | 8.10              | 3.26               | 7.11              |
| Ir-Ph                                  | 3.19       | 11.12             | 3.23               | 18.04             |
| Ir-N-CN                                | 2.80       | 19.5              | 2.76               | 22.26             |
| Ir-N-F                                 | 2.80       | 18.70             | 3.33               | 9.75              |
| Ir-N-Ph                                | 2.79       | 19.70             | 2.73               | 18.62             |
| HB- <i>fac</i> -Ir(pmi) <sub>3</sub>   | 3.26       | 6.70              | 3.44               | 5.92              |
| HB- <i>fac</i> -Ir(pmiCN) <sub>3</sub> | 2.90       | 12.60             | 3.17               | 11.10             |
| Pt[ <i>pti</i> -O-CbPy]                | 2.70       | 7.90              | 2.66               | 9.89              |
| Pt-IP                                  | 2.70       | 12.60             | 2.68               | 11.77             |
| Pt[ <i>pti</i> -O-InPy]                | 2.51       | 11.50             | 2.50               | 14.75             |
| Pt-In-H                                | 2.57       | 23.30             | 2.55               | 22.86             |

**Table S2.** The cartesian coordinates of optimized structures in S<sub>0</sub>, T<sub>1</sub>, and <sup>3</sup>MC state of Ir(III) and Pt(II) phosphorescent materials.

**S<sub>0</sub> state**

**Irpmi**

|    |          |          |          |
|----|----------|----------|----------|
| Ir | 0.005199 | 0.007904 | -0.05773 |
| C  | 0.377944 | 1.853966 | -0.87232 |
| N  | -0.14946 | 2.681558 | -1.81467 |
| N  | 1.379532 | 2.587277 | -0.29716 |
| C  | 0.50583  | 3.911101 | -1.81667 |
| C  | -1.33336 | 2.366304 | -2.60012 |
| C  | 2.082279 | 1.988416 | 0.789402 |
| C  | 1.470367 | 3.848149 | -0.86484 |
| H  | 0.230344 | 4.709361 | -2.48429 |
| H  | -2.23431 | 2.480384 | -1.99387 |
| H  | -1.27651 | 1.334911 | -2.94392 |
| C  | 1.595124 | 0.712063 | 1.134977 |
| C  | 3.134883 | 2.62569  | 1.439072 |
| H  | 2.189991 | 4.583566 | -0.55274 |
| C  | 2.24695  | 0.091962 | 2.20887  |
| C  | 3.751975 | 1.970882 | 2.504815 |
| H  | 3.473575 | 3.611153 | 1.136584 |
| C  | 3.303726 | 0.706025 | 2.886395 |
| H  | 1.914687 | -0.8906  | 2.525863 |
| H  | 4.571894 | 2.447446 | 3.030143 |
| H  | 3.779597 | 0.196515 | 3.718403 |
| C  | 1.386113 | -1.14718 | -1.04125 |
| N  | 2.321104 | -1.01319 | -2.02021 |
| N  | 1.553671 | -2.42534 | -0.58286 |
| C  | 3.065242 | -2.18313 | -2.15811 |
| C  | 2.587199 | 0.233101 | -2.72267 |
| C  | 0.72846  | -2.84007 | 0.503578 |
| C  | 2.577659 | -3.07175 | -1.25646 |
| H  | 3.864239 | -2.27691 | -2.87342 |
| H  | 3.187461 | 0.902245 | -2.10261 |
| H  | 1.643458 | 0.726205 | -2.94879 |
| C  | -0.12908 | -1.82526 | 0.973571 |
| C  | 0.791037 | -4.12184 | 1.041356 |



|   |          |          |          |
|---|----------|----------|----------|
| H | 2.87511  | -4.08301 | -1.04441 |
| C | -0.94664 | -2.18354 | 2.053008 |
| C | -0.04003 | -4.43242 | 2.117559 |
| H | 1.470407 | -4.86921 | 0.644896 |
| C | -0.9053  | -3.46015 | 2.620181 |
| H | -1.6236  | -1.44293 | 2.464565 |
| H | -0.00713 | -5.42273 | 2.557471 |
| H | -1.54921 | -3.69765 | 3.461135 |
| C | -1.72038 | -0.51301 | -1.03514 |
| N | -2.10684 | -1.29657 | -2.0775  |
| N | -2.89288 | -0.05616 | -0.49821 |
| C | -3.49588 | -1.33349 | -2.18071 |
| C | -1.18432 | -2.09132 | -2.87436 |
| C | -2.79873 | 0.757599 | 0.66892  |
| C | -3.98834 | -0.54906 | -1.18922 |
| H | -4.00253 | -1.90788 | -2.93713 |
| H | -0.83616 | -2.95464 | -2.30395 |
| H | -0.32104 | -1.48418 | -3.14247 |
| C | -1.47564 | 0.936419 | 1.120036 |
| C | -3.91729 | 1.300254 | 1.293782 |
| H | -5.00424 | -0.31546 | -0.92562 |
| C | -1.33578 | 1.713949 | 2.27669  |
| C | -3.72956 | 2.067275 | 2.443565 |
| H | -4.91766 | 1.133993 | 0.907821 |
| C | -2.43824 | 2.269486 | 2.931613 |
| H | -0.34168 | 1.880763 | 2.676953 |
| H | -4.58509 | 2.498186 | 2.951227 |
| H | -2.29044 | 2.861747 | 3.82919  |
| H | -1.68961 | -2.42896 | -3.77945 |
| H | 3.119271 | 0.017661 | -3.64978 |
| H | -1.38339 | 3.035598 | -3.45943 |

Irpmb

|   |          |          |          |
|---|----------|----------|----------|
| C | 1.875664 | 2.947431 | 3.074968 |
| C | 1.529254 | 1.739731 | 2.464763 |
| C | 0.613674 | 1.679872 | 1.408827 |
| C | 0.053924 | 2.907988 | 1.001933 |
| C | 0.402311 | 4.129462 | 1.575564 |
| C | 1.320593 | 4.143273 | 2.62577  |
| H | 2.583655 | 2.95495  | 3.8974   |

|    |          |          |          |
|----|----------|----------|----------|
| H  | 1.978356 | 0.819309 | 2.820426 |
| H  | 1.596223 | 5.086601 | 3.08345  |
| c  | -1.80651 | 3.665966 | -0.63294 |
| c  | -2.52757 | 2.915058 | -1.58181 |
| c  | -1.03741 | 1.516846 | -0.59952 |
| N  | -2.01646 | 1.62005  | -1.54094 |
| N  | -0.89233 | 2.77621  | -0.06271 |
| Ir | 0.008122 | 0.000523 | 0.293183 |
| C  | -1.73643 | -0.30316 | 1.434015 |
| C  | -2.52316 | -1.40956 | 1.054098 |
| C  | -2.22916 | 0.470394 | 2.490262 |
| C  | -3.73869 | -1.72123 | 1.660409 |
| C  | -3.43434 | 0.168109 | 3.128237 |
| H  | -1.65424 | 1.32673  | 2.824353 |
| C  | -4.19277 | -0.92266 | 2.710458 |
| H  | -3.78274 | 0.786503 | 3.949145 |
| H  | -5.13495 | -1.15768 | 3.192528 |
| C  | -2.30053 | -3.38874 | -0.6046  |
| C  | -1.30729 | -3.63928 | -1.5715  |
| N  | -0.42186 | -2.56608 | -1.52579 |
| N  | -1.95546 | -2.16827 | -0.01745 |
| C  | -0.79554 | -1.67155 | -0.5689  |
| C  | 1.157133 | -1.33716 | 1.444828 |
| C  | 2.503545 | -1.47072 | 1.04841  |
| C  | 0.748656 | -2.13428 | 2.519184 |
| C  | 3.388929 | -2.36092 | 1.652814 |
| C  | 1.622426 | -3.01727 | 3.158018 |
| H  | -0.27596 | -2.05969 | 2.86584  |
| C  | 2.939548 | -3.13728 | 2.721385 |
| H  | 1.272909 | -3.61537 | 3.993364 |
| H  | 3.620043 | -3.83075 | 3.202397 |
| C  | 4.08869  | -0.29326 | -0.63061 |
| C  | 3.79658  | 0.679112 | -1.60719 |
| C  | 1.845765 | 0.129454 | -0.5924  |
| N  | 2.42182  | 0.894712 | -1.56066 |
| N  | 2.863708 | -0.61365 | -0.03881 |
| C  | 4.781786 | 1.252912 | -2.40108 |
| C  | 5.406035 | -0.70447 | -0.43131 |
| C  | -3.33034 | -4.3092  | -0.41238 |
| C  | -1.31059 | -4.78224 | -2.36095 |

|      |          |          |          |
|------|----------|----------|----------|
| C    | -2.11393 | 5.010637 | -0.42934 |
| C    | -3.54713 | 3.469783 | -2.34554 |
| C    | 6.094993 | 0.829222 | -2.20095 |
| H    | 6.891045 | 1.256406 | -2.79896 |
| C    | 6.396964 | -0.1317  | -1.2295  |
| H    | 7.426529 | -0.4372  | -1.08503 |
| H    | 5.674059 | -1.42945 | 0.320649 |
| H    | 4.541879 | 2.009754 | -3.13741 |
| C    | -3.84065 | 4.817802 | -2.14319 |
| H    | -4.63163 | 5.284061 | -2.7183  |
| C    | -3.13527 | 5.570448 | -1.19744 |
| H    | -3.3905  | 6.613035 | -1.04885 |
| H    | -1.60288 | 5.611333 | 0.306167 |
| H    | -4.10285 | 2.875935 | -3.06028 |
| C    | -2.34871 | -5.69282 | -2.16773 |
| H    | -2.38397 | -6.59723 | -2.76321 |
| C    | -3.3381  | -5.45636 | -1.20677 |
| H    | -4.12971 | -6.18322 | -1.06788 |
| H    | -4.09921 | -4.16497 | 0.329928 |
| H    | -0.53092 | -4.96505 | -3.08991 |
| C    | 1.725691 | 1.882556 | -2.36638 |
| H    | 0.66883  | 1.631677 | -2.38213 |
| H    | 1.848673 | 2.882922 | -1.94371 |
| H    | 2.118245 | 1.867226 | -3.38477 |
| C    | -2.55273 | 0.508032 | -2.30631 |
| H    | -1.79378 | -0.26656 | -2.37099 |
| H    | -3.44023 | 0.09667  | -1.81905 |
| H    | -2.81155 | 0.846408 | -3.31093 |
| C    | 0.786985 | -2.47818 | -2.32559 |
| H    | 1.128427 | -1.44733 | -2.31981 |
| H    | 1.57149  | -3.11646 | -1.91131 |
| H    | 0.572378 | -2.78517 | -3.3511  |
| H    | -4.34159 | -2.55562 | 1.334904 |
| H    | -0.00791 | 5.06356  | 1.221755 |
| H    | 4.406668 | -2.47476 | 1.310528 |
| Ir-N |          |          |          |
| Ir   | -0.33609 | -0.00085 | -0.00067 |
| C    | 0.636136 | 1.238165 | 1.315319 |

|   |          |          |          |
|---|----------|----------|----------|
| N | 1.713811 | 2.071943 | 1.349249 |
| N | 0.111354 | 1.312096 | 2.578788 |
| C | 1.861346 | 2.638427 | 2.615272 |
| C | 2.624949 | 2.311948 | 0.239571 |
| C | -1.05282 | 0.533262 | 2.850002 |
| C | 0.850805 | 2.161964 | 3.384172 |
| H | 2.645368 | 3.339787 | 2.844687 |
| H | 2.933491 | 3.361266 | 0.279228 |
| H | 2.071312 | 2.160814 | -0.683   |
| C | -1.48976 | -0.22359 | 1.745124 |
| C | -1.68263 | 0.542204 | 4.090732 |
| H | 0.597392 | 2.370277 | 4.408166 |
| C | -2.63636 | -0.99844 | 1.965604 |
| C | -2.82114 | -0.24441 | 4.263802 |
| H | -1.31022 | 1.147388 | 4.910705 |
| C | -3.29369 | -1.01193 | 3.198499 |
| H | -3.02723 | -1.59828 | 1.15094  |
| H | -3.33217 | -0.25271 | 5.219908 |
| H | -4.18183 | -1.62224 | 3.329342 |
| C | 0.650247 | -1.75238 | 0.414928 |
| N | 1.729046 | -2.19185 | 1.122223 |
| N | 0.132954 | -2.8874  | -0.1522  |
| C | 1.885242 | -3.57071 | 0.981292 |
| C | 2.636646 | -1.34565 | 1.882971 |
| C | -1.03155 | -2.7413  | -0.96302 |
| C | 0.878954 | -4.00502 | 0.182544 |
| H | 2.671928 | -4.11481 | 1.475564 |
| H | 2.948914 | -1.90254 | 2.771906 |
| H | 2.079838 | -0.47305 | 2.213604 |
| C | -1.4788  | -1.40945 | -1.06599 |
| C | -1.65332 | -3.82514 | -1.57516 |
| H | 0.632317 | -4.99775 | -0.14896 |
| C | -2.62652 | -1.22183 | -1.84771 |
| C | -2.7935  | -3.59054 | -2.34294 |
| H | -1.2735  | -4.83505 | -1.46054 |
| C | -3.27578 | -2.28787 | -2.47556 |
| H | -3.02441 | -0.21936 | -1.96059 |
| H | -3.29841 | -4.41843 | -2.82772 |
| H | -4.16508 | -2.10285 | -3.06993 |
| C | 0.643939 | 0.523276 | -1.72586 |

|   |          |          |          |
|---|----------|----------|----------|
| N | 1.724933 | 0.137966 | -2.46081 |
| N | 0.119129 | 1.578882 | -2.42427 |
| C | 1.875546 | 0.951547 | -3.58368 |
| C | 2.636995 | -0.94101 | -2.11032 |
| C | -1.04972 | 2.199126 | -1.89128 |
| C | 0.863214 | 1.853723 | -3.55943 |
| H | 2.662893 | 0.801064 | -4.30245 |
| H | 2.949521 | -1.43147 | -3.03747 |
| H | 2.082809 | -1.66502 | -1.51898 |
| C | -1.49159 | 1.618226 | -0.68629 |
| C | -1.67952 | 3.267339 | -2.52248 |
| H | 0.611286 | 2.636095 | -4.25273 |
| C | -2.64332 | 2.192742 | -0.1321  |
| C | -2.82294 | 3.806622 | -1.93401 |
| H | -1.30339 | 3.676477 | -3.4544  |
| C | -3.30066 | 3.265441 | -0.73989 |
| H | -3.03865 | 1.78498  | 0.791644 |
| H | -3.33397 | 4.637349 | -2.40739 |
| H | -4.19282 | 3.680561 | -0.28154 |
| C | 3.879956 | 1.422544 | 0.268784 |
| H | 4.582667 | 1.839811 | -0.46705 |
| H | 4.353941 | 1.535003 | 1.250944 |
| C | 3.887942 | -0.92347 | 1.094484 |
| H | 4.362608 | -1.82955 | 0.700089 |
| C | 3.887987 | -0.46619 | -1.35083 |
| H | 4.359823 | 0.330408 | -1.938   |
| H | 4.592196 | -0.49186 | 1.820561 |
| H | 4.594673 | -1.3086  | -1.34147 |
| N | 3.664453 | 0.010118 | 0.00374  |

Ir-C

|    |          |          |          |
|----|----------|----------|----------|
| Ir | -0.38809 | 0.000582 | -0.00104 |
| C  | 0.623872 | 0.859894 | -1.56339 |
| N  | 1.765814 | 0.662099 | -2.28014 |
| N  | 0.110969 | 2.03088  | -2.05176 |
| C  | 1.957137 | 1.695858 | -3.19622 |
| C  | 2.664076 | -0.47716 | -2.12988 |
| C  | -1.07779 | 2.528538 | -1.43908 |
| C  | 0.917298 | 2.554601 | -3.0489  |
| H  | 2.792305 | 1.717275 | -3.87521 |

|   |          |          |          |
|---|----------|----------|----------|
| H | 2.831518 | -0.8866  | -3.13067 |
| H | 2.130157 | -1.23082 | -1.56432 |
| C | -1.53972 | 1.725341 | -0.37772 |
| C | -1.70296 | 3.695195 | -1.86824 |
| H | 0.687627 | 3.465902 | -3.57127 |
| C | -2.70677 | 2.179827 | 0.251573 |
| C | -2.862   | 4.108484 | -1.21232 |
| H | -1.3108  | 4.27532  | -2.69709 |
| C | -3.35902 | 3.347462 | -0.15375 |
| H | -3.1176  | 1.6028   | 1.072488 |
| H | -3.36936 | 5.012754 | -1.52909 |
| H | -4.26256 | 3.665255 | 0.35706  |
| C | 0.616537 | 0.922724 | 1.528701 |
| N | 1.761396 | 1.636531 | 1.723476 |
| N | 0.095683 | 0.761657 | 2.784485 |
| C | 1.946614 | 1.910634 | 3.078103 |
| C | 2.664353 | 2.076874 | 0.665374 |
| C | -1.09695 | -0.01361 | 2.901485 |
| C | 0.900091 | 1.358296 | 3.74157  |
| H | 2.782598 | 2.483555 | 3.441332 |
| H | 2.832609 | 3.147808 | 0.814232 |
| H | 2.133341 | 1.966334 | -0.27224 |
| C | -1.55081 | -0.53178 | 1.671935 |
| C | -1.73295 | -0.22226 | 4.121579 |
| H | 0.664461 | 1.35484  | 4.790716 |
| C | -2.72029 | -1.30116 | 1.742819 |
| C | -2.89395 | -0.99461 | 4.143059 |
| H | -1.34786 | 0.206001 | 5.041226 |
| C | -3.38273 | -1.53134 | 2.951392 |
| H | -3.12419 | -1.72361 | 0.829568 |
| H | -3.40952 | -1.17021 | 5.080532 |
| H | -4.28755 | -2.13095 | 2.964622 |
| C | 0.613545 | -1.78689 | 0.036278 |
| N | 1.753292 | -2.31321 | 0.566434 |
| N | 0.09643  | -2.7942  | -0.73176 |
| C | 1.938252 | -3.62565 | 0.133315 |
| C | 2.651041 | -1.61282 | 1.477838 |
| C | -1.09189 | -2.50704 | -1.46789 |
| C | 0.896777 | -3.92388 | -0.68368 |
| H | 2.770221 | -4.22794 | 0.455671 |

|   |          |          |          |
|---|----------|----------|----------|
| H | 2.810803 | -2.26989 | 2.337888 |
| H | 2.118528 | -0.74132 | 1.837719 |
| C | -1.54517 | -1.18236 | -1.30555 |
| C | -1.7247  | -3.45999 | -2.25997 |
| H | 0.662661 | -4.83183 | -1.20991 |
| C | -2.71156 | -0.85931 | -2.01202 |
| C | -2.88281 | -3.09258 | -2.94425 |
| H | -1.33966 | -4.4708  | -2.34614 |
| C | -3.37144 | -1.79183 | -2.81672 |
| H | -3.11578 | 0.143    | -1.9241  |
| H | -3.39627 | -3.81716 | -3.56615 |
| H | -4.27429 | -1.5039  | -3.34617 |
| C | 4.041506 | -0.17762 | -1.51534 |
| H | 4.673154 | -1.01685 | -1.83073 |
| H | 4.455974 | 0.703452 | -2.02053 |
| C | 4.309088 | -0.00914 | 0.006836 |
| C | 4.041613 | 1.393984 | 0.620729 |
| H | 4.45437  | 1.391239 | 1.636847 |
| C | 4.032426 | -1.24034 | 0.915225 |
| H | 4.443764 | -2.12186 | 0.408297 |
| H | 4.674289 | 2.086215 | 0.052115 |
| H | 4.661948 | -1.09485 | 1.801417 |
| H | 5.408549 | -0.0124  | 0.009264 |

Ir-Ph

|    |          |          |          |
|----|----------|----------|----------|
| Ir | -0.86487 | 0.090389 | 0.03748  |
| C  | 0.301535 | 0.521777 | 1.692496 |
| N  | 1.285464 | 1.405079 | 2.033148 |
| N  | -0.14945 | 0.038159 | 2.89278  |
| C  | 1.426075 | 1.475759 | 3.417015 |
| C  | 1.837132 | 2.365777 | 1.074934 |
| C  | -1.36399 | -0.70733 | 2.881679 |
| C  | 0.532329 | 0.611808 | 3.955576 |
| H  | 2.139547 | 2.12115  | 3.897063 |
| H  | 1.113996 | 3.176676 | 0.954613 |
| H  | 1.893114 | 1.840888 | 0.124747 |
| C  | -1.98832 | -0.74745 | 1.619345 |
| C  | -1.88238 | -1.30014 | 4.029286 |
| H  | 0.323326 | 0.375235 | 4.983438 |
| C  | -3.21671 | -1.42098 | 1.581292 |

|   |          |          |          |
|---|----------|----------|----------|
| C | -3.10779 | -1.96028 | 3.943076 |
| H | -1.35434 | -1.25301 | 4.976124 |
| C | -3.77361 | -2.01255 | 2.718265 |
| H | -3.75303 | -1.48051 | 0.640747 |
| H | -3.53474 | -2.42552 | 4.824424 |
| H | -4.73209 | -2.51733 | 2.648757 |
| C | -0.49754 | -1.91427 | -0.3696  |
| N | 0.254019 | -2.94591 | 0.10175  |
| N | -1.39844 | -2.51454 | -1.21033 |
| C | -0.18728 | -4.16178 | -0.41604 |
| C | 1.389802 | -2.79462 | 1.007164 |
| C | -2.38585 | -1.69226 | -1.82267 |
| C | -1.22556 | -3.88734 | -1.24217 |
| H | 0.26852  | -5.10141 | -0.15884 |
| H | 1.079816 | -3.05086 | 2.024924 |
| H | 1.63446  | -1.73323 | 0.998728 |
| C | -2.35144 | -0.35544 | -1.38498 |
| C | -3.2949  | -2.18763 | -2.75287 |
| H | -1.84659 | -4.54512 | -1.82316 |
| C | -3.31883 | 0.485401 | -1.95125 |
| C | -4.24193 | -1.31502 | -3.28794 |
| H | -3.27847 | -3.22756 | -3.06151 |
| C | -4.25009 | 0.019829 | -2.88321 |
| H | -3.35502 | 1.525623 | -1.64793 |
| H | -4.96383 | -1.67755 | -4.01102 |
| H | -4.9898  | 0.700872 | -3.29219 |
| C | 0.11829  | 1.067009 | -1.48525 |
| N | 0.929636 | 0.773647 | -2.5395  |
| N | -0.20071 | 2.387927 | -1.6569  |
| C | 1.086365 | 1.885902 | -3.36429 |
| C | 1.406733 | -0.58343 | -2.8122  |
| C | -1.07971 | 2.974664 | -0.70178 |
| C | 0.384433 | 2.901898 | -2.80242 |
| H | 1.673443 | 1.865122 | -4.26488 |
| H | 0.625672 | -1.124   | -3.35579 |
| H | 1.509669 | -1.06021 | -1.8393  |
| C | -1.55752 | 2.058191 | 0.256965 |
| C | -1.41664 | 4.324506 | -0.72452 |
| H | 0.252646 | 3.918883 | -3.12596 |
| C | -2.42263 | 2.590889 | 1.220555 |



|   |          |          |          |
|---|----------|----------|----------|
| C | -2.28311 | 4.811088 | 0.254799 |
| H | -1.02108 | 4.992749 | -1.4823  |
| C | -2.78357 | 3.941111 | 1.224202 |
| H | -2.83057 | 1.929966 | 1.978002 |
| H | -2.56332 | 5.858382 | 0.256027 |
| H | -3.46125 | 4.316726 | 1.984398 |
| C | 3.201855 | 2.941794 | 1.448915 |
| C | 2.585749 | -3.65126 | 0.55689  |
| C | 2.720672 | -0.66008 | -3.59302 |
| C | 4.108874 | -1.45668 | -0.9616  |
| C | 4.147385 | -1.67623 | 0.41696  |
| C | 4.236574 | -0.57389 | 1.267096 |
| C | 4.2938   | 0.72699  | 0.76842  |
| C | 4.234976 | 0.914658 | -0.61445 |
| C | 4.119807 | -0.16416 | -1.49163 |
| H | 4.015434 | -2.30554 | -1.63201 |
| H | 4.221093 | -0.72915 | 2.3416   |
| H | 4.230527 | 1.922488 | -1.01789 |
| C | 3.928748 | 0.078191 | -2.97381 |
| C | 3.947526 | -3.06725 | 0.978679 |
| C | 4.313075 | 1.902916 | 1.717607 |
| H | 4.222093 | 1.522603 | 2.737915 |
| H | 5.282135 | 2.411975 | 1.667373 |
| H | 3.116657 | 3.604717 | 2.316077 |
| H | 3.490733 | 3.588419 | 0.614421 |
| H | 4.022942 | -3.03743 | 2.070061 |
| H | 4.738517 | -3.73912 | 0.628546 |
| H | 2.491027 | -4.67231 | 0.939798 |
| H | 2.561795 | -3.72628 | -0.53368 |
| H | 4.827201 | -0.22445 | -3.52393 |
| H | 3.819615 | 1.153394 | -3.13619 |
| H | 2.577595 | -0.30016 | -4.61747 |
| H | 2.949551 | -1.72615 | -3.68954 |

Ir-N-F

|    |          |          |          |
|----|----------|----------|----------|
| Ir | 0.010428 | 0.001743 | -0.36818 |
| C  | 1.7806   | -0.20264 | 0.647247 |
| N  | 2.273546 | -0.85196 | 1.733218 |
| N  | 2.853151 | 0.506675 | 0.144104 |
| C  | 3.625485 | -0.55124 | 1.938315 |

|   |          |          |          |
|---|----------|----------|----------|
| C | 1.503156 | -1.71047 | 2.622094 |
| C | 2.626892 | 1.299582 | -1.02934 |
| C | 3.958023 | 0.290513 | 0.934188 |
| H | 4.220819 | -0.97359 | 2.72748  |
| H | 2.155034 | -2.52769 | 2.945559 |
| H | 0.691122 | -2.14093 | 2.042588 |
| C | 1.296192 | 1.232833 | -1.48714 |
| C | 3.631964 | 2.042596 | -1.64504 |
| C | 1.019774 | 1.983003 | -2.63779 |
| C | 3.306521 | 2.771624 | -2.78791 |
| H | 4.642191 | 2.055481 | -1.25872 |
| C | 2.002062 | 2.739305 | -3.28045 |
| H | 0.014867 | 1.966438 | -3.04425 |
| H | 4.070902 | 3.355864 | -3.28745 |
| H | 1.749776 | 3.303846 | -4.17252 |
| C | -0.73403 | 1.654736 | 0.592084 |
| N | -0.45813 | 2.426858 | 1.674459 |
| N | -1.86632 | 2.218133 | 0.037387 |
| C | -1.40271 | 3.448824 | 1.827678 |
| C | 0.633222 | 2.202916 | 2.611744 |
| C | -2.39855 | 1.602705 | -1.14353 |
| C | -2.26109 | 3.296321 | 0.794622 |
| H | -1.36385 | 4.189774 | 2.60556  |
| H | 1.005717 | 3.180855 | 2.931682 |
| H | 1.432186 | 1.700342 | 2.074048 |
| C | -1.65771 | 0.477707 | -1.5557  |
| C | -3.52425 | 2.086447 | -1.80697 |
| C | -2.12726 | -0.15932 | -2.71182 |
| C | -3.95165 | 1.417721 | -2.95319 |
| H | -4.05634 | 2.959444 | -1.45389 |
| C | -3.25175 | 0.297874 | -3.40206 |
| H | -1.59406 | -1.02719 | -3.08327 |
| H | -4.82344 | 1.775234 | -3.48921 |
| H | -3.58266 | -0.2202  | -4.29662 |
| C | -1.08649 | -1.44964 | 0.581594 |
| N | -1.93876 | -1.5744  | 1.631003 |
| N | -0.99062 | -2.72221 | 0.05326  |
| C | -2.36298 | -2.89903 | 1.790941 |
| C | -2.32554 | -0.5     | 2.534011 |
| C | -0.14754 | -2.89899 | -1.09315 |

|   |          |          |          |
|---|----------|----------|----------|
| C | -1.76149 | -3.58683 | 0.794812 |
| H | -3.05749 | -3.21909 | 2.546461 |
| H | -3.37152 | -0.65759 | 2.814144 |
| H | -2.26381 | 0.43315  | 1.981553 |
| C | 0.473228 | -1.70381 | -1.50614 |
| C | 0.019457 | -4.12896 | -1.72625 |
| C | 1.302422 | -1.81638 | -2.62989 |
| C | 0.854771 | -4.18868 | -2.8407  |
| H | -0.4852  | -5.01861 | -1.37447 |
| C | 1.492774 | -3.03246 | -3.28925 |
| H | 1.802161 | -0.92927 | -3.00194 |
| H | 0.99963  | -5.13315 | -3.35272 |
| H | 2.139698 | -3.07814 | -4.15962 |
| C | 0.95976  | -0.98161 | 3.863326 |
| H | 0.600828 | -1.75631 | 4.555852 |
| H | 1.800507 | -0.48466 | 4.361107 |
| C | 0.220023 | 1.392737 | 3.852097 |
| H | -0.64934 | 1.883377 | 4.304851 |
| C | -1.46686 | -0.43397 | 3.808219 |
| H | -1.47494 | -1.42561 | 4.27509  |
| H | 1.041125 | 1.480219 | 4.578112 |
| H | -1.97945 | 0.244136 | 4.505441 |
| N | -0.09071 | -0.00751 | 3.61722  |
| F | -3.32291 | 4.030324 | 0.479622 |
| F | -1.85881 | -4.87844 | 0.498648 |
| F | 5.134938 | 0.848125 | 0.670631 |

Ir-N-CN

|    |          |          |          |
|----|----------|----------|----------|
| Ir | -0.002   | 0.000052 | -0.36533 |
| C  | -1.79812 | 0.209638 | 0.589461 |
| N  | -2.30878 | 0.888891 | 1.664022 |
| N  | -2.86472 | -0.4693  | 0.064434 |
| C  | -3.65181 | 0.630755 | 1.818935 |
| C  | -1.53505 | 1.735618 | 2.565758 |
| C  | -2.61109 | -1.27309 | -1.09816 |
| C  | -4.01741 | -0.22368 | 0.817193 |
| H  | -4.25437 | 1.071383 | 2.594957 |
| H  | -2.17881 | 2.560887 | 2.882544 |
| H  | -0.71094 | 2.153007 | 1.99478  |
| C  | -1.26673 | -1.22366 | -1.51541 |

|   |          |          |          |
|---|----------|----------|----------|
| C | -3.60049 | -2.01095 | -1.74415 |
| C | -0.95666 | -1.98329 | -2.65046 |
| C | -3.24409 | -2.74985 | -2.87042 |
| H | -4.6257  | -2.0202  | -1.40037 |
| C | -1.92387 | -2.73417 | -3.32014 |
| H | 0.06152  | -1.97778 | -3.02252 |
| H | -3.99787 | -3.32975 | -3.38996 |
| H | -1.64794 | -3.30704 | -4.19947 |
| C | 0.718802 | -1.66404 | 0.580117 |
| N | 0.387745 | -2.45173 | 1.651184 |
| N | 1.83977  | -2.24427 | 0.050739 |
| C | 1.283834 | -3.48577 | 1.799404 |
| C | -0.72951 | -2.20996 | 2.557987 |
| C | 2.405983 | -1.61672 | -1.11035 |
| C | 2.205569 | -3.36879 | 0.797353 |
| H | 1.204967 | -4.23223 | 2.571391 |
| H | -1.12067 | -3.18177 | 2.871527 |
| H | -1.50561 | -1.70266 | 1.992641 |
| C | 1.688307 | -0.47679 | -1.52193 |
| C | 3.539777 | -2.09999 | -1.75964 |
| C | 2.187516 | 0.175777 | -2.65625 |
| C | 3.998516 | -1.417   | -2.88411 |
| H | 4.061883 | -2.98411 | -1.42047 |
| C | 3.32156  | -0.28167 | -3.32902 |
| H | 1.670989 | 1.053992 | -3.02598 |
| H | 4.877143 | -1.77659 | -3.40671 |
| H | 3.677289 | 0.247252 | -4.20722 |
| C | 1.085855 | 1.450093 | 0.581872 |
| N | 1.936777 | 1.551304 | 1.65084  |
| N | 1.027899 | 2.713317 | 0.058246 |
| C | 2.388383 | 2.842776 | 1.80177  |
| C | 2.288519 | 0.45922  | 2.552481 |
| C | 0.193942 | 2.897071 | -1.09635 |
| C | 1.824774 | 3.587487 | 0.804221 |
| H | 3.077612 | 3.143105 | 2.57257  |
| H | 3.325509 | 0.607781 | 2.866244 |
| H | 2.241108 | -0.46513 | 1.983698 |
| C | -0.44011 | 1.709108 | -1.50937 |
| C | 0.0444   | 4.123721 | -1.73941 |
| C | -1.26265 | 1.822194 | -2.63727 |

|   |          |          |          |
|---|----------|----------|----------|
| C | -0.784   | 4.186511 | -2.85795 |
| H | 0.553219 | 5.015447 | -1.39997 |
| C | -1.43497 | 3.036337 | -3.30357 |
| H | -1.76968 | 0.938455 | -3.00712 |
| H | -0.91296 | 5.129882 | -3.37549 |
| H | -2.07669 | 3.085425 | -4.17725 |
| C | -1.01861 | 0.993602 | 3.810327 |
| H | -0.64712 | 1.761948 | 4.502479 |
| H | -1.87507 | 0.52011  | 4.304203 |
| C | -0.33908 | -1.39878 | 3.805112 |
| H | 0.501792 | -1.90658 | 4.291657 |
| C | 1.393045 | 0.385667 | 3.801443 |
| H | 1.414306 | 1.36618  | 4.291089 |
| H | -1.18668 | -1.46455 | 4.50124  |
| H | 1.875823 | -0.31757 | 4.494058 |
| N | 0.01086  | -0.00622 | 3.576351 |
| C | 2.021671 | 4.967291 | 0.582906 |
| N | 2.208444 | 6.100718 | 0.450657 |
| C | 3.302964 | -4.22694 | 0.571433 |
| N | 4.192076 | -4.95346 | 0.434727 |
| C | -5.31101 | -0.74323 | 0.597028 |
| N | -6.38547 | -1.14925 | 0.464873 |

Ir-N-Ph

|    |          |          |          |
|----|----------|----------|----------|
| Ir | -0.01073 | 0.02193  | -0.38275 |
| C  | 0.453877 | -1.72392 | 0.576537 |
| N  | -0.02521 | -2.46211 | 1.612674 |
| N  | 1.504614 | -2.45632 | 0.077424 |
| C  | 0.708924 | -3.63348 | 1.760731 |
| C  | -1.13904 | -2.0869  | 2.47188  |
| C  | 2.254112 | -1.84021 | -0.98355 |
| C  | 1.661447 | -3.65303 | 0.789313 |
| H  | 0.448973 | -4.39454 | 2.476746 |
| H  | -1.66669 | -3.00375 | 2.752498 |
| H  | -1.82007 | -1.47408 | 1.887003 |
| C  | 1.685511 | -0.62987 | -1.43489 |
| C  | 3.449457 | -2.35676 | -1.48092 |
| C  | 2.361747 | 0.007104 | -2.48388 |
| C  | 4.092379 | -1.68186 | -2.51824 |
| H  | 3.889316 | -3.25746 | -1.07855 |

|   |          |          |          |
|---|----------|----------|----------|
| C | 3.539142 | -0.50852 | -3.02864 |
| H | 1.954901 | 0.931259 | -2.87929 |
| H | 5.019881 | -2.07595 | -2.91845 |
| H | 4.032157 | 0.011338 | -3.84437 |
| C | 1.201065 | 1.32159  | 0.63038  |
| N | 1.999093 | 1.305645 | 1.731299 |
| N | 1.359696 | 2.57929  | 0.09835  |
| C | 2.64726  | 2.525984 | 1.884636 |
| C | 2.154799 | 0.183386 | 2.645639 |
| C | 0.530564 | 2.893329 | -1.03374 |
| C | 2.270706 | 3.329785 | 0.853423 |
| H | 3.383196 | 2.70033  | 2.6511   |
| H | 3.188193 | 0.187809 | 3.005747 |
| H | 2.000421 | -0.73157 | 2.08046  |
| C | -0.21175 | 1.788234 | -1.50136 |
| C | 0.424414 | 4.171949 | -1.57891 |
| C | -1.03104 | 2.028538 | -2.61225 |
| C | -0.41112 | 4.365344 | -2.6787  |
| H | 0.964733 | 5.010962 | -1.16578 |
| C | -1.12676 | 3.289824 | -3.20291 |
| H | -1.60923 | 1.20577  | -3.01871 |
| H | -0.49916 | 5.35373  | -3.11581 |
| H | -1.76884 | 3.437325 | -4.06588 |
| C | -1.81105 | 0.449527 | 0.491751 |
| N | -2.27865 | 1.18676  | 1.534392 |
| N | -2.93709 | -0.06495 | -0.10711 |
| C | -3.66688 | 1.135809 | 1.588526 |
| C | -1.45792 | 1.915381 | 2.490817 |
| C | -2.71244 | -0.97611 | -1.19609 |
| C | -4.0959  | 0.369369 | 0.549569 |
| H | -4.24152 | 1.710776 | 2.294685 |
| H | -2.00601 | 2.817044 | 2.781121 |
| H | -0.5484  | 2.225114 | 1.983581 |
| C | -1.35476 | -1.07277 | -1.5679  |
| C | -3.72345 | -1.73255 | -1.78712 |
| C | -1.07413 | -1.93699 | -2.63459 |
| C | -3.39471 | -2.587   | -2.83911 |
| H | -4.74632 | -1.67803 | -1.44458 |
| C | -2.07225 | -2.67672 | -3.27113 |
| H | -0.04709 | -2.03252 | -2.96973 |

|   |          |          |          |
|---|----------|----------|----------|
| H | -4.17212 | -3.17707 | -3.31151 |
| H | -1.81724 | -3.33282 | -4.09772 |
| C | -0.70924 | -1.34922 | 3.7522   |
| H | -1.58389 | -1.3334  | 4.418768 |
| H | 0.053644 | -1.95656 | 4.253452 |
| C | 1.205322 | 0.236955 | 3.85513  |
| H | 1.314293 | 1.219623 | 4.328656 |
| C | -1.12367 | 1.104871 | 3.754798 |
| H | -2.06302 | 0.72272  | 4.171185 |
| H | 1.572487 | -0.50318 | 4.581383 |
| H | -0.72004 | 1.814169 | 4.492235 |
| N | -0.19951 | -0.00071 | 3.57109  |
| C | -5.48852 | 0.195804 | 0.104791 |
| C | -5.88301 | 0.630774 | -1.16884 |
| C | -6.44999 | -0.33857 | 0.969253 |
| C | -7.21046 | 0.523626 | -1.56782 |
| H | -5.14078 | 1.044522 | -1.84135 |
| C | -7.7824  | -0.43772 | 0.569732 |
| H | -6.14607 | -0.68701 | 1.949858 |
| C | -8.16499 | -0.01034 | -0.69973 |
| H | -7.50258 | 0.861125 | -2.55575 |
| H | -8.51766 | -0.85719 | 1.247288 |
| H | -9.19948 | -0.09294 | -1.01323 |
| C | 2.544542 | -4.78103 | 0.449287 |
| C | 3.431498 | -5.301   | 1.398163 |
| C | 2.456854 | -5.39247 | -0.80977 |
| C | 4.218715 | -6.41158 | 1.0955   |
| H | 3.510101 | -4.82281 | 2.367996 |
| C | 3.247822 | -6.49515 | -1.11169 |
| H | 1.772103 | -4.99112 | -1.54757 |
| C | 4.131233 | -7.00876 | -0.16    |
| H | 4.905472 | -6.80298 | 1.837665 |
| H | 3.172865 | -6.95785 | -2.08922 |
| H | 4.747335 | -7.86846 | -0.39797 |
| C | 2.84757  | 4.638975 | 0.506484 |
| C | 3.503553 | 4.819567 | -0.71993 |
| C | 2.812618 | 5.696643 | 1.421714 |
| C | 4.10249  | 6.036861 | -1.02355 |
| H | 3.532039 | 4.002725 | -1.43142 |
| C | 3.420967 | 6.91422  | 1.118177 |

|   |          |          |          |
|---|----------|----------|----------|
| H | 2.29552  | 5.563896 | 2.365316 |
| C | 4.063889 | 7.088183 | -0.10537 |
| H | 4.604256 | 6.165287 | -1.97591 |
| H | 3.38349  | 7.727889 | 1.833816 |
| H | 4.531262 | 8.03662  | -0.34478 |

HB-Ir

|    |          |          |          |
|----|----------|----------|----------|
| C  | -2.30534 | 2.577287 | 3.163893 |
| C  | -1.21717 | 1.922837 | 2.57301  |
| C  | -1.38777 | 1.128062 | 1.439242 |
| C  | -2.71783 | 1.070488 | 0.978544 |
| C  | -3.56527 | 2.428867 | 2.60454  |
| H  | -2.17663 | 3.192683 | 4.046575 |
| H  | -0.22863 | 2.029196 | 3.006363 |
| H  | -4.43968 | 2.913314 | 3.024341 |
| C  | -4.0631  | -0.10355 | -0.8923  |
| C  | -3.60836 | -0.96799 | -1.89891 |
| C  | -1.78689 | -0.32975 | -0.69541 |
| N  | -2.21975 | -1.0696  | -1.7457  |
| N  | -2.90862 | 0.264529 | -0.17152 |
| Ir | -0.02268 | 0.001373 | 0.325504 |
| C  | -0.4286  | -1.74599 | 1.402231 |
| C  | 0.308105 | -2.87621 | 0.997985 |
| C  | -1.30141 | -1.99116 | 2.462627 |
| C  | -1.39353 | -3.26383 | 3.040193 |
| H  | -1.91314 | -1.18288 | 2.848192 |
| C  | -0.60441 | -4.28856 | 2.540753 |
| H  | -2.06794 | -3.45642 | 3.866312 |
| H  | -0.63835 | -5.29114 | 2.952049 |
| C  | 2.148789 | -3.46678 | -0.71928 |
| C  | 2.777237 | -2.63944 | -1.66135 |
| N  | 2.181961 | -1.37653 | -1.54914 |
| N  | 1.204302 | -2.64213 | -0.07455 |
| C  | 1.228364 | -1.36753 | -0.58498 |
| C  | 1.585288 | 0.51561  | 1.562685 |
| C  | 2.244295 | 1.709715 | 1.21043  |
| C  | 2.124264 | -0.11629 | 2.683904 |
| C  | 3.219216 | 0.433027 | 3.363052 |
| H  | 1.685774 | -1.04333 | 3.037253 |
| C  | 3.770639 | 1.619494 | 2.904198 |



|   |          |          |          |
|---|----------|----------|----------|
| H | 3.63808  | -0.05382 | 4.235955 |
| H | 4.618977 | 2.08464  | 3.393554 |
| C | 2.023654 | 3.588308 | -0.55208 |
| C | 1.086615 | 3.724086 | -1.58658 |
| C | 0.631779 | 1.761636 | -0.52893 |
| N | 0.264664 | 2.591176 | -1.53724 |
| N | 1.704159 | 2.368145 | 0.077954 |
| C | 1.06476  | 4.810828 | -2.45363 |
| C | 3.01215  | 4.569145 | -0.3465  |
| C | 2.516333 | -4.81981 | -0.59455 |
| C | 3.785934 | -3.08394 | -2.50894 |
| C | -5.42947 | 0.21721  | -0.78551 |
| C | -4.45397 | -1.55778 | -2.8318  |
| C | 2.045078 | 5.780553 | -2.24495 |
| H | 2.076512 | 6.651509 | -2.88916 |
| C | 2.98968  | 5.662282 | -1.2246  |
| H | 3.743091 | 6.426421 | -1.07865 |
| H | 0.327103 | 4.901836 | -3.23948 |
| C | -5.80708 | -1.23916 | -2.71992 |
| H | -6.51403 | -1.67163 | -3.41831 |
| C | -6.27945 | -0.37775 | -1.72891 |
| H | -7.33422 | -0.14266 | -1.65842 |
| H | -4.086   | -2.23033 | -3.59482 |
| C | 4.14841  | -4.42436 | -2.37951 |
| H | 4.930752 | -4.82672 | -3.01241 |
| C | 3.531691 | -5.26578 | -1.45275 |
| H | 3.827246 | -6.30413 | -1.36747 |
| H | 4.267218 | -2.42777 | -3.22153 |
| C | -0.85333 | 2.385965 | -2.44167 |
| H | -1.23168 | 1.378509 | -2.30405 |
| H | -1.65004 | 3.103087 | -2.23039 |
| H | -0.52131 | 2.51389  | -3.47438 |
| C | -1.38499 | -1.90074 | -2.59583 |
| H | -0.34535 | -1.64882 | -2.41339 |
| H | -1.54506 | -2.95861 | -2.37426 |
| H | -1.6271  | -1.71331 | -3.64401 |
| C | 2.587917 | -0.2345  | -2.35018 |
| H | 3.563726 | 0.134214 | -2.0252  |
| H | 2.646617 | -0.5256  | -3.40095 |
| H | 1.849949 | 0.552301 | -2.2335  |

|   |          |          |          |
|---|----------|----------|----------|
| O | 1.970058 | -5.68876 | 0.267544 |
| H | 1.279106 | -5.2159  | 0.819469 |
| N | 0.246481 | -4.09647 | 1.517896 |
| O | -5.9574  | 1.035718 | 0.13543  |
| H | -5.22854 | 1.367258 | 0.739088 |
| O | 3.952112 | 4.525086 | 0.607997 |
| H | 3.822008 | 3.698187 | 1.16047  |
| N | -3.77315 | 1.676214 | 1.510256 |
| N | 3.284659 | 2.258876 | 1.82609  |

HB-Ir-  
CN

|    |          |          |          |
|----|----------|----------|----------|
| C  | 1.87185  | -2.84123 | 3.521247 |
| C  | 0.890757 | -2.06248 | 2.896175 |
| C  | 1.198782 | -1.27967 | 1.782465 |
| C  | 2.544251 | -1.36741 | 1.381515 |
| C  | 3.164285 | -2.83073 | 3.017783 |
| H  | 1.636807 | -3.44769 | 4.38781  |
| H  | -0.1211  | -2.06329 | 3.286324 |
| H  | 3.959365 | -3.41589 | 3.465405 |
| C  | 4.088832 | -0.32908 | -0.4106  |
| C  | 3.778434 | 0.593677 | -1.42173 |
| C  | 1.848623 | 0.150435 | -0.30795 |
| N  | 2.406737 | 0.850708 | -1.32669 |
| N  | 2.874813 | -0.57194 | 0.253449 |
| Ir | 0.015758 | 0.000687 | 0.621876 |
| C  | 0.548161 | 1.675592 | 1.756658 |
| C  | -0.04995 | 2.881509 | 1.349434 |
| C  | 1.389027 | 1.80825  | 2.862838 |
| C  | 1.579597 | 3.051676 | 3.476566 |
| H  | 1.895167 | 0.934107 | 3.257271 |
| C  | 0.922906 | 4.162425 | 2.967919 |
| H  | 2.22802  | 3.157171 | 4.338176 |
| H  | 1.036768 | 5.147206 | 3.40624  |
| C  | -1.76049 | 3.682917 | -0.41227 |
| C  | -2.43327 | 2.94198  | -1.39638 |
| N  | -1.96214 | 1.627757 | -1.30509 |
| N  | -0.91777 | 2.761281 | 0.232169 |
| C  | -1.04581 | 1.505238 | -0.3127  |
| C  | -1.68827 | -0.36241 | 1.784503 |
| C  | -2.44061 | -1.4858  | 1.398771 |

|   |          |          |          |
|---|----------|----------|----------|
| C | -2.20772 | 0.312069 | 2.890874 |
| C | -3.37356 | -0.13614 | 3.523158 |
| H | -1.69799 | 1.191722 | 3.268739 |
| C | -4.0157  | -1.2642  | 3.033848 |
| H | -3.77829 | 0.382474 | 4.384075 |
| H | -4.92117 | -1.65091 | 3.487152 |
| C | -2.33061 | -3.35943 | -0.37612 |
| C | -1.38057 | -3.56756 | -1.3879  |
| C | -0.77661 | -1.67362 | -0.28734 |
| N | -0.4587  | -2.51939 | -1.29903 |
| N | -1.92076 | -2.18553 | 0.27849  |
| C | -1.43055 | -4.63487 | -2.27096 |
| C | -3.41031 | -4.24918 | -0.20723 |
| C | -2.00378 | 5.062175 | -0.25646 |
| C | -3.36842 | 3.494383 | -2.25796 |
| C | 5.404178 | -0.80702 | -0.24948 |
| C | 4.718717 | 1.095305 | -2.30822 |
| C | -2.50642 | -5.51812 | -2.10174 |
| C | -3.46786 | -5.32824 | -1.0976  |
| H | -4.28848 | -6.02501 | -0.98862 |
| H | -0.68968 | -4.7892  | -3.04238 |
| C | 6.027372 | 0.619095 | -2.14524 |
| C | 6.358055 | -0.30681 | -1.14407 |
| H | 7.376005 | -0.65839 | -1.04033 |
| H | 4.471057 | 1.813256 | -3.07688 |
| C | -3.6114  | 4.866018 | -2.0984  |
| C | -2.94546 | 5.626441 | -1.12534 |
| H | -3.15115 | 6.683795 | -1.02378 |
| H | -3.8887  | 2.912663 | -3.00523 |
| C | 0.690241 | -2.39963 | -2.18206 |
| H | 1.170898 | -1.44477 | -1.99604 |
| H | 1.400703 | -3.20739 | -1.99189 |
| H | 0.363178 | -2.44685 | -3.22329 |
| C | 1.707957 | 1.783462 | -2.19635 |
| H | 0.64008  | 1.64464  | -2.06174 |
| H | 1.974803 | 2.812731 | -1.94606 |
| H | 1.972689 | 1.585644 | -3.23678 |
| C | -2.45026 | 0.547861 | -2.1481  |
| H | -1.79151 | -0.30641 | -2.03126 |
| H | -3.46491 | 0.265656 | -1.85796 |

|   |          |          |          |
|---|----------|----------|----------|
| H | -2.45006 | 0.866821 | -3.19221 |
| O | -1.40879 | 5.851238 | 0.641599 |
| H | -0.78391 | 5.301768 | 1.206302 |
| N | 0.107933 | 4.078035 | 1.902592 |
| O | 5.793357 | -1.68691 | 0.6767   |
| H | 5.005105 | -1.94418 | 1.245158 |
| O | -4.3624  | -4.13392 | 0.721928 |
| H | -4.17843 | -3.32433 | 1.289272 |
| N | 3.501603 | -2.09377 | 1.945668 |
| N | -3.54981 | -1.93982 | 1.969625 |
| C | -2.6263  | -6.6427  | -2.97881 |
| N | -2.71629 | -7.54684 | -3.69285 |
| C | -4.56503 | 5.506467 | -2.95204 |
| N | -5.33571 | 6.015947 | -3.64617 |
| C | 7.051927 | 1.090527 | -3.02623 |
| N | 7.872072 | 1.475151 | -3.74369 |

PT-Ref

|    |          |          |          |
|----|----------|----------|----------|
| C  | -2.18145 | -1.96567 | -0.03851 |
| C  | -1.99234 | -3.33936 | 0.099248 |
| C  | -3.50891 | -1.53743 | -0.2398  |
| N  | -3.61592 | -0.11959 | -0.36873 |
| C  | -3.07362 | -4.23275 | 0.04535  |
| C  | -4.59977 | -2.38976 | -0.29829 |
| C  | -4.36314 | -3.76087 | -0.15253 |
| H  | -2.87465 | -5.29164 | 0.15863  |
| H  | -5.60681 | -2.01699 | -0.44264 |
| H  | -5.19156 | -4.45808 | -0.19376 |
| Pt | -0.80807 | -0.54295 | 0.215146 |
| C  | 0.658221 | -1.94124 | 0.268793 |
| C  | 0.454098 | -3.32733 | 0.208574 |
| C  | 1.996542 | -1.56572 | 0.120832 |
| C  | 1.495056 | -4.2554  | 0.018982 |
| C  | 3.054529 | -2.453   | -0.14816 |
| C  | 2.795788 | -3.82568 | -0.17779 |
| H  | 1.241834 | -5.308   | -0.0148  |
| H  | 3.589168 | -4.53802 | -0.37204 |
| O  | -0.77952 | -3.94215 | 0.302041 |
| C  | 0.121803 | 1.953669 | 1.659721 |
| C  | 1.979795 | 0.829312 | 0.836287 |

|   |          |          |          |
|---|----------|----------|----------|
| C | 0.884722 | 2.897036 | 2.312657 |
| H | -0.95611 | 1.980769 | 1.713136 |
| C | 2.819715 | 1.732308 | 1.520487 |
| C | 2.273789 | 2.771478 | 2.245077 |
| H | 0.403864 | 3.688421 | 2.871454 |
| H | 3.886682 | 1.574785 | 1.512433 |
| H | 2.922314 | 3.457357 | 2.778304 |
| N | 0.634722 | 0.946656 | 0.91578  |
| C | -4.67112 | 0.683189 | -0.76726 |
| C | -4.1829  | 1.943539 | -0.86861 |
| H | -4.6533  | 2.862943 | -1.16958 |
| H | -5.65827 | 0.302212 | -0.95892 |
| N | 2.520501 | -0.22978 | 0.112623 |
| C | 4.234905 | -1.66744 | -0.42893 |
| C | 3.876603 | -0.3076  | -0.29172 |
| C | 5.519631 | -2.00695 | -0.85755 |
| C | 6.423647 | -0.99437 | -1.16451 |
| C | 6.042637 | 0.350044 | -1.07072 |
| C | 4.764892 | 0.70849  | -0.64127 |
| H | 4.475593 | 1.750795 | -0.61078 |
| H | 6.744401 | 1.128381 | -1.34762 |
| H | 7.423132 | -1.24585 | -1.50024 |
| H | 5.799438 | -3.04868 | -0.96602 |
| N | -2.82747 | 1.879587 | -0.53325 |
| C | -2.46965 | 0.604585 | -0.20762 |
| C | -1.90789 | 2.966444 | -0.62344 |
| C | -0.71817 | 2.799981 | -1.33139 |
| C | -2.18218 | 4.172671 | 0.015263 |
| C | 0.208568 | 3.834402 | -1.36293 |
| H | -0.51742 | 1.8547   | -1.81907 |
| C | -1.2494  | 5.205874 | -0.03802 |
| H | -3.10526 | 4.291232 | 0.571298 |
| C | -0.03465 | 5.04993  | -0.71281 |
| H | 1.139219 | 3.692285 | -1.90219 |
| H | -1.46484 | 6.140829 | 0.468348 |
| C | 1.003815 | 6.143779 | -0.71604 |
| H | 0.568259 | 7.11313  | -0.46499 |
| H | 1.78828  | 5.931048 | 0.018405 |
| H | 1.487139 | 6.230572 | -1.69241 |

## Pt-Iso

|    |          |          |          |
|----|----------|----------|----------|
| C  | -3.55156 | -0.45766 | 0.103221 |
| C  | -4.15171 | -1.68476 | 0.383386 |
| C  | -4.42031 | 0.626459 | -0.13975 |
| N  | -3.71932 | 1.84369  | -0.40801 |
| C  | -5.54877 | -1.81583 | 0.417762 |
| C  | -5.80218 | 0.531594 | -0.11214 |
| C  | -6.36266 | -0.71915 | 0.170536 |
| H  | -5.9714  | -2.78866 | 0.638615 |
| H  | -6.43582 | 1.391818 | -0.29294 |
| H  | -7.44    | -0.83195 | 0.198534 |
| Pt | -1.60769 | -0.03737 | 0.205482 |
| C  | -1.17612 | -2.01029 | 0.375222 |
| C  | -2.11413 | -3.04288 | 0.494118 |
| C  | 0.125451 | -2.45774 | 0.146305 |
| C  | -1.76677 | -4.40602 | 0.429728 |
| C  | 0.511032 | -3.80036 | 0.011694 |
| C  | -0.45939 | -4.79355 | 0.180914 |
| H  | -2.55519 | -5.14119 | 0.537037 |
| H  | -0.20536 | -5.84352 | 0.092028 |
| O  | -3.47301 | -2.84546 | 0.656744 |
| C  | 0.672259 | 1.54928  | 1.465696 |
| C  | 1.476744 | -0.4623  | 0.661384 |
| C  | 1.864992 | 1.8603   | 2.077918 |
| H  | -0.17213 | 2.220714 | 1.522263 |
| C  | 2.695741 | -0.2361  | 1.323197 |
| C  | 2.917785 | 0.933114 | 2.028398 |
| H  | 1.960672 | 2.801788 | 2.602599 |
| H  | 3.45729  | -1.00193 | 1.28003  |
| N  | 0.460087 | 0.417548 | 0.756608 |
| C  | -4.14858 | 3.064649 | -0.90214 |
| C  | -3.03551 | 3.805026 | -1.13279 |
| H  | -2.91585 | 4.796271 | -1.53342 |
| H  | -5.18569 | 3.300726 | -1.06163 |
| N  | 1.275053 | -1.62793 | -0.0817  |
| C  | 1.902197 | -3.82296 | -0.39517 |
| C  | 2.333273 | -2.47793 | -0.50542 |
| C  | 2.759802 | -4.86079 | -0.75689 |
| C  | 4.022058 | -4.5408  | -1.24786 |
| C  | 4.395243 | -3.20693 | -1.43722 |

|   |          |          |          |
|---|----------|----------|----------|
| C | 3.553217 | -2.13616 | -1.1054  |
| H | 5.354125 | -2.99605 | -1.89709 |
| H | 4.709355 | -5.33066 | -1.52949 |
| H | 2.439083 | -5.89293 | -0.67544 |
| N | -1.94136 | 3.010849 | -0.77634 |
| C | -2.35827 | 1.799266 | -0.31354 |
| C | -0.56584 | 3.331133 | -0.98622 |
| C | 0.241173 | 2.431692 | -1.67979 |
| C | -0.02224 | 4.503666 | -0.46528 |
| C | 1.600063 | 2.69301  | -1.81601 |
| H | -0.19196 | 1.521591 | -2.07394 |
| C | 1.33713  | 4.758952 | -0.62278 |
| H | -0.65384 | 5.194146 | 0.08227  |
| C | 2.173448 | 3.852064 | -1.28508 |
| H | 2.222888 | 1.978822 | -2.34381 |
| H | 1.757204 | 5.669265 | -0.20761 |
| C | 3.656143 | 4.106866 | -1.3943  |
| H | 3.867312 | 5.157753 | -1.60782 |
| H | 4.159489 | 3.854566 | -0.45577 |
| H | 4.107523 | 3.502057 | -2.18362 |
| C | 4.244706 | 1.190828 | 2.714393 |
| C | 4.069862 | 1.460554 | 4.218342 |
| C | 4.996228 | 2.343704 | 2.023699 |
| H | 4.84934  | 0.284232 | 2.603741 |
| H | 3.543303 | 0.638202 | 4.708423 |
| H | 5.045005 | 1.578973 | 4.698553 |
| H | 3.499203 | 2.377063 | 4.392916 |
| H | 5.162535 | 2.125446 | 0.966282 |
| H | 4.428933 | 3.276648 | 2.094051 |
| H | 5.968602 | 2.504838 | 2.497271 |
| C | 3.909438 | -0.71877 | -1.54284 |
| C | 3.802836 | -0.60177 | -3.07565 |
| C | 5.29207  | -0.25974 | -1.05257 |
| H | 3.174446 | -0.03079 | -1.12606 |
| H | 2.804936 | -0.88432 | -3.41995 |
| H | 4.000992 | 0.426027 | -3.39824 |
| H | 4.525817 | -1.25493 | -3.57177 |
| H | 5.374732 | -0.32565 | 0.034592 |
| H | 6.091821 | -0.86644 | -1.48524 |
| H | 5.472339 | 0.779676 | -1.34335 |

## Pt-HB-ref

|    |          |          |          |
|----|----------|----------|----------|
| C  | 2.213011 | -1.42258 | 0.035266 |
| C  | 3.55535  | -1.04896 | 0.062956 |
| C  | 1.954754 | -2.80783 | 0.029327 |
| N  | 0.560232 | -3.10781 | -0.02546 |
| C  | 4.57899  | -2.00943 | 0.098498 |
| C  | 2.938136 | -3.78322 | 0.065557 |
| C  | 4.271743 | -3.36197 | 0.10077  |
| H  | 5.606616 | -1.66709 | 0.121336 |
| H  | 2.693359 | -4.83865 | 0.073266 |
| H  | 5.068448 | -4.09585 | 0.128711 |
| Pt | 0.634085 | -0.21516 | 0.18992  |
| C  | 1.82988  | 1.408181 | 0.01608  |
| C  | 3.224534 | 1.372038 | -0.11416 |
| C  | 1.281102 | 2.676147 | -0.2133  |
| C  | 4.002327 | 2.494737 | -0.45923 |
| C  | 2.016355 | 3.812314 | -0.61697 |
| C  | 3.408051 | 3.713685 | -0.7276  |
| H  | 5.074689 | 2.364821 | -0.54101 |
| H  | 4.004376 | 4.567809 | -1.02705 |
| O  | 4.002824 | 0.242529 | 0.062168 |
| C  | -2.00149 | 0.51965  | 1.49627  |
| C  | -1.11913 | 2.422807 | 0.501839 |
| C  | -3.11754 | 1.179831 | 1.959253 |
| H  | -1.85139 | -0.52737 | 1.710685 |
| C  | -2.23636 | 3.163223 | 0.951304 |
| C  | -3.23851 | 2.539512 | 1.662871 |
| H  | -3.86225 | 0.645621 | 2.533021 |
| H  | -4.08966 | 3.112778 | 2.012272 |
| N  | -1.03118 | 1.095926 | 0.747973 |
| C  | -0.10169 | -4.29721 | -0.27835 |
| C  | -1.41343 | -3.98865 | -0.41847 |
| H  | -2.26575 | -4.6045  | -0.64531 |
| H  | 0.402201 | -5.24419 | -0.35401 |
| N  | -0.08703 | 3.064204 | -0.16848 |
| C  | 1.08189  | 4.875518 | -0.86802 |
| C  | -0.16024 | 4.40679  | -0.59391 |
| N  | -1.52274 | -2.60462 | -0.25296 |
| C  | -0.30264 | -2.04989 | 0.005811 |



|   |          |          |          |
|---|----------|----------|----------|
| C | -2.71423 | -1.8529  | -0.47649 |
| C | -2.68225 | -0.76232 | -1.34527 |
| C | -3.89385 | -2.19412 | 0.178843 |
| C | -3.82794 | 0.002035 | -1.52459 |
| H | -1.7555  | -0.50838 | -1.84394 |
| C | -5.03861 | -1.42574 | -0.02227 |
| H | -3.90834 | -3.03738 | 0.860004 |
| C | -5.02207 | -0.30944 | -0.86343 |
| H | -3.79182 | 0.858617 | -2.18944 |
| H | -5.95296 | -1.69137 | 0.497741 |
| C | -6.24215 | 0.560548 | -1.03519 |
| H | -7.14769 | 0.057516 | -0.68995 |
| H | -6.13659 | 1.488252 | -0.46238 |
| H | -6.38668 | 0.8401   | -2.08197 |
| H | -2.28264 | 4.227151 | 0.780042 |
| H | -1.10901 | 4.900877 | -0.70431 |
| H | 1.310245 | 5.862583 | -1.24086 |

Pt-HB

|    |          |          |          |
|----|----------|----------|----------|
| C  | 2.511945 | -1.1133  | 0.038683 |
| C  | 3.767764 | -0.51078 | 0.030619 |
| C  | 2.499773 | -2.52294 | 0.054674 |
| N  | 1.179354 | -3.06318 | 0.016116 |
| C  | 4.945394 | -1.27316 | 0.060523 |
| C  | 3.640791 | -3.30738 | 0.087435 |
| C  | 4.880324 | -2.65815 | 0.091461 |
| H  | 5.89703  | -0.75553 | 0.055965 |
| H  | 3.586012 | -4.38908 | 0.114399 |
| H  | 5.793684 | -3.24037 | 0.116529 |
| Pt | 0.749619 | -0.20158 | 0.202351 |
| C  | 1.647786 | 1.592813 | 0.001887 |
| C  | 3.018083 | 1.812116 | -0.15016 |
| C  | 0.880085 | 2.747806 | -0.20346 |
| C  | 3.581242 | 3.070695 | -0.48541 |
| C  | 1.39463  | 4.006924 | -0.58251 |
| C  | 2.784925 | 4.168898 | -0.71644 |
| H  | 4.658498 | 3.130782 | -0.58093 |
| H  | 3.214517 | 5.122248 | -0.99937 |
| O  | 3.98452  | 0.844068 | -0.01005 |
| C  | -1.99397 | 0.06095  | 1.472287 |

|   |          |          |          |
|---|----------|----------|----------|
| C | -1.48103 | 2.073991 | 0.424821 |
| C | -3.25118 | 0.495001 | 1.828254 |
| H | -1.63597 | -0.91841 | 1.746553 |
| C | -2.79033 | 2.574566 | 0.708437 |
| C | -3.66083 | 1.758026 | 1.416679 |
| H | -3.90347 | -0.15126 | 2.39971  |
| H | -4.64306 | 2.15097  | 1.649092 |
| N | -1.13588 | 0.812463 | 0.745039 |
| C | 0.735452 | -4.34977 | -0.24069 |
| C | -0.60863 | -4.27207 | -0.39209 |
| H | -1.33966 | -5.02647 | -0.62362 |
| H | 1.396254 | -5.19528 | -0.31082 |
| N | -0.5084  | 2.903136 | -0.15367 |
| C | 0.262353 | 4.843478 | -0.75363 |
| N | -0.95799 | -2.92835 | -0.23031 |
| C | 0.14417  | -2.17199 | 0.03915  |
| C | -2.25958 | -2.39251 | -0.47079 |
| C | -2.40307 | -1.30914 | -1.3375  |
| C | -3.37043 | -2.92923 | 0.17238  |
| C | -3.65705 | -0.74218 | -1.52051 |
| H | -1.52843 | -0.89992 | -1.82683 |
| C | -4.62509 | -2.35916 | -0.03418 |
| H | -3.24994 | -3.76509 | 0.852178 |
| C | -4.78686 | -1.24807 | -0.86669 |
| H | -3.75817 | 0.116632 | -2.17544 |
| H | -5.48602 | -2.77331 | 0.479816 |
| C | -6.1274  | -0.57776 | -1.02986 |
| H | -6.94104 | -1.2079  | -0.66511 |
| H | -6.15299 | 0.362726 | -0.46888 |
| H | -6.3267  | -0.33564 | -2.07697 |
| H | 0.220487 | 5.880325 | -1.05466 |
| O | -3.22746 | 3.792309 | 0.343524 |
| H | -2.46703 | 4.264197 | -0.08917 |
| N | -0.85372 | 4.198318 | -0.49917 |

T<sub>1</sub> states

Irpmi

|    |          |          |          |
|----|----------|----------|----------|
| Ir | -0.00709 | -0.01405 | -0.03524 |
| C  | -1.37859 | -1.25596 | -0.9724  |
| N  | -1.43622 | -2.16151 | -1.98433 |

|   |          |          |          |
|---|----------|----------|----------|
| N | -2.63041 | -1.27999 | -0.42048 |
| C | -2.69852 | -2.74417 | -2.05585 |
| C | -0.30036 | -2.55942 | -2.80299 |
| C | -2.8724  | -0.44381 | 0.71094  |
| C | -3.44914 | -2.18674 | -1.07267 |
| H | -2.94443 | -3.49653 | -2.78572 |
| H | 0.111173 | -3.50795 | -2.45011 |
| H | 0.466675 | -1.79274 | -2.71832 |
| C | -1.74178 | 0.285664 | 1.125552 |
| C | -4.11536 | -0.3763  | 1.333669 |
| H | -4.4713  | -2.36521 | -0.7909  |
| C | -1.93414 | 1.115372 | 2.237132 |
| C | -4.26016 | 0.46071  | 2.439617 |
| H | -4.95879 | -0.96042 | 0.980741 |
| C | -3.16744 | 1.203575 | 2.887866 |
| H | -1.09668 | 1.697839 | 2.605759 |
| H | -5.21706 | 0.527105 | 2.944788 |
| H | -3.27702 | 1.851714 | 3.751592 |
| C | -0.43732 | 1.78069  | -0.96804 |
| N | -1.26359 | 2.258099 | -1.93395 |
| N | 0.189776 | 2.887507 | -0.47207 |
| C | -1.15515 | 3.643024 | -2.03577 |
| C | -2.20359 | 1.428574 | -2.67442 |
| C | 1.084984 | 2.693531 | 0.621318 |
| C | -0.23811 | 4.037515 | -1.11663 |
| H | -1.73303 | 4.216034 | -2.74033 |
| H | -2.99094 | 1.068058 | -2.01062 |
| H | -1.68331 | 0.569221 | -3.09659 |
| C | 1.161754 | 1.354687 | 1.053667 |
| C | 1.793217 | 3.742075 | 1.200027 |
| H | 0.127538 | 5.019051 | -0.87419 |
| C | 2.011444 | 1.122543 | 2.14243  |
| C | 2.631429 | 3.462854 | 2.279003 |
| H | 1.699355 | 4.75854  | 0.832449 |
| C | 2.735251 | 2.15275  | 2.747613 |
| H | 2.09594  | 0.114197 | 2.533482 |
| H | 3.19121  | 4.263187 | 2.749441 |
| H | 3.38023  | 1.934388 | 3.592819 |
| C | 1.710586 | -0.5326  | -1.04033 |
| N | 2.535209 | -0.07312 | -2.02988 |

|   |          |          |          |
|---|----------|----------|----------|
| N | 2.408458 | -1.63703 | -0.4949  |
| C | 3.674536 | -0.84688 | -2.13456 |
| C | 2.288639 | 1.159668 | -2.75683 |
| C | 1.887111 | -2.24446 | 0.59104  |
| C | 3.607926 | -1.83873 | -1.19713 |
| H | 4.43962  | -0.63764 | -2.86322 |
| H | 2.45161  | 2.02319  | -2.10765 |
| H | 1.254491 | 1.181577 | -3.10414 |
| C | 0.619684 | -1.62408 | 1.091763 |
| C | 2.490523 | -3.39039 | 1.227661 |
| H | 4.301052 | -2.62431 | -0.96009 |
| C | 0.067449 | -2.21459 | 2.215431 |
| C | 1.869993 | -3.90619 | 2.325869 |
| H | 3.410575 | -3.8202  | 0.850021 |
| C | 0.652318 | -3.33376 | 2.84352  |
| H | -0.84427 | -1.7979  | 2.627713 |
| H | 2.301874 | -4.76485 | 2.829981 |
| H | 0.196079 | -3.77177 | 3.723128 |
| H | 2.960509 | 1.213403 | -3.61368 |
| H | -2.64391 | 2.017961 | -3.47843 |
| H | -0.61236 | -2.66311 | -3.84415 |

Irpmb

|    |          |          |          |
|----|----------|----------|----------|
| C  | -1.50981 | 2.67814  | 3.417653 |
| C  | -0.70323 | 1.850259 | 2.635291 |
| C  | -1.21371 | 1.166456 | 1.526288 |
| C  | -2.57134 | 1.366504 | 1.229591 |
| C  | -3.38879 | 2.213841 | 1.976331 |
| C  | -2.84939 | 2.867208 | 3.083692 |
| H  | -1.09122 | 3.18085  | 4.283417 |
| H  | 0.340352 | 1.722637 | 2.899764 |
| H  | -3.47687 | 3.524629 | 3.674618 |
| C  | -4.29245 | 0.388638 | -0.42637 |
| C  | -4.08938 | -0.45488 | -1.5323  |
| C  | -2.05642 | -0.02555 | -0.63969 |
| N  | -2.71858 | -0.67627 | -1.62929 |
| N  | -3.01597 | 0.645646 | 0.082971 |
| Ir | -0.1156  | -0.06768 | 0.199247 |
| C  | -0.77573 | -1.91718 | 0.947092 |
| C  | -0.1625  | -3.02485 | 0.323679 |

|   |          |          |          |
|---|----------|----------|----------|
| C | -1.733   | -2.19456 | 1.925811 |
| C | -0.48781 | -4.34504 | 0.643428 |
| C | -2.05426 | -3.50797 | 2.281451 |
| H | -2.22341 | -1.36951 | 2.432265 |
| C | -1.43605 | -4.58142 | 1.637438 |
| H | -2.78699 | -3.69548 | 3.05961  |
| H | -1.69796 | -5.60074 | 1.898873 |
| C | 2.083361 | -3.17727 | -0.77482 |
| C | 2.810659 | -2.2426  | -1.56135 |
| N | 1.964475 | -1.2169  | -1.88193 |
| N | 0.798763 | -2.68758 | -0.65505 |
| C | 0.703041 | -1.36604 | -1.24321 |
| C | 1.651406 | -0.12528 | 1.249575 |
| C | 2.55282  | 0.940613 | 0.996307 |
| C | 2.108854 | -1.13326 | 2.11358  |
| C | 3.838034 | 0.98081  | 1.524102 |
| C | 3.38687  | -1.10231 | 2.667847 |
| H | 1.446335 | -1.95796 | 2.346983 |
| C | 4.251687 | -0.05151 | 2.369105 |
| H | 3.713108 | -1.90169 | 3.324014 |
| H | 5.252638 | -0.02941 | 2.784757 |
| C | 2.478885 | 3.194519 | -0.27695 |
| C | 1.466575 | 3.712634 | -1.10745 |
| C | 0.786267 | 1.669206 | -0.41622 |
| N | 0.460007 | 2.751329 | -1.16577 |
| N | 2.024734 | 1.933927 | 0.123062 |
| C | 1.560878 | 4.96614  | -1.69841 |
| C | 3.620119 | 3.949878 | -0.01368 |
| C | 2.713641 | -4.30561 | -0.25023 |
| C | 4.15992  | -2.43921 | -1.85435 |
| C | -5.58627 | 0.753145 | -0.05416 |
| C | -5.14046 | -0.93442 | -2.30473 |
| C | 2.710143 | 5.711515 | -1.43813 |
| H | 2.820209 | 6.69461  | -1.87984 |
| C | 3.717905 | 5.209352 | -0.60683 |
| H | 4.59693  | 5.812389 | -0.41277 |
| H | 4.406686 | 3.597219 | 0.634771 |
| H | 0.769311 | 5.351568 | -2.32895 |
| C | -6.42922 | -0.55429 | -1.93601 |
| H | -7.27624 | -0.91085 | -2.5098  |

|   |          |          |          |
|---|----------|----------|----------|
| C | -6.64379 | 0.271395 | -0.82525 |
| H | -7.65682 | 0.540343 | -0.55027 |
| H | -5.78571 | 1.370108 | 0.807624 |
| H | -4.96304 | -1.58729 | -3.15005 |
| C | 4.772086 | -3.59368 | -1.35074 |
| H | 5.816981 | -3.77878 | -1.57215 |
| C | 4.065103 | -4.50357 | -0.55876 |
| H | 4.572074 | -5.3794  | -0.17098 |
| H | 2.181523 | -4.99909 | 0.384905 |
| H | 4.716009 | -1.71714 | -2.43893 |
| C | -0.79536 | 2.930862 | -1.87357 |
| H | -1.32828 | 1.984321 | -1.86512 |
| H | -1.40451 | 3.691212 | -1.379   |
| H | -0.60119 | 3.234239 | -2.90482 |
| C | -2.12929 | -1.55552 | -2.62845 |
| H | -1.04556 | -1.54516 | -2.4878  |
| H | -2.50455 | -2.57223 | -2.49001 |
| H | -2.38894 | -1.20378 | -3.63021 |
| C | 2.35585  | -0.05689 | -2.64232 |
| H | 1.468085 | 0.534933 | -2.85663 |
| H | 3.068689 | 0.564414 | -2.08776 |
| H | 2.817134 | -0.35962 | -3.58769 |
| H | -0.03178 | -5.17186 | 0.112309 |
| H | -4.41952 | 2.392325 | 1.708658 |
| H | 4.528802 | 1.77515  | 1.284434 |

Ir-N

|    |          |          |          |
|----|----------|----------|----------|
| Ir | -0.35373 | -0.01189 | -0.00286 |
| C  | 0.662969 | 0.007463 | -1.80415 |
| N  | 1.74964  | -0.56782 | -2.38702 |
| N  | 0.16408  | 0.845092 | -2.76365 |
| C  | 1.930681 | -0.0816  | -3.68151 |
| C  | 2.652489 | -1.50892 | -1.73903 |
| C  | -1.00348 | 1.597445 | -2.43648 |
| C  | 0.930054 | 0.80315  | -3.91681 |
| H  | 2.728892 | -0.42263 | -4.31845 |
| H  | 2.977276 | -2.23414 | -2.49156 |
| H  | 2.087456 | -2.04482 | -0.98074 |
| C  | -1.47109 | 1.367898 | -1.12836 |

|   |          |          |          |
|---|----------|----------|----------|
| C | -1.60905 | 2.462679 | -3.34233 |
| H | 0.70023  | 1.377092 | -4.7965  |
| C | -2.62422 | 2.07829  | -0.77003 |
| C | -2.75153 | 3.153285 | -2.93992 |
| H | -1.21485 | 2.601481 | -4.34355 |
| C | -3.25507 | 2.957146 | -1.65342 |
| H | -3.04447 | 1.927666 | 0.218504 |
| H | -3.24316 | 3.831844 | -3.62774 |
| H | -4.14793 | 3.488603 | -1.33948 |
| C | 0.64944  | 1.540744 | 0.900392 |
| N | 1.717009 | 2.374734 | 0.716783 |
| N | 0.074003 | 1.982662 | 2.116823 |
| C | 1.841929 | 3.272801 | 1.763155 |
| C | 2.652247 | 2.287869 | -0.39328 |
| C | -1.04555 | 1.36863  | 2.555792 |
| C | 0.826185 | 3.042758 | 2.647648 |
| H | 2.622584 | 4.014492 | 1.785866 |
| H | 2.984313 | 3.303015 | -0.63257 |
| H | 2.115062 | 1.902634 | -1.25673 |
| C | -1.52983 | 0.264338 | 1.667257 |
| C | -1.71598 | 1.721871 | 3.785491 |
| H | 0.561182 | 3.551668 | 3.555661 |
| C | -2.67299 | -0.38954 | 2.091577 |
| C | -2.83461 | 1.019826 | 4.120463 |
| H | -1.34793 | 2.523861 | 4.414003 |
| C | -3.33914 | -0.04334 | 3.286655 |
| H | -3.06992 | -1.19321 | 1.482295 |
| H | -3.36515 | 1.265332 | 5.035017 |
| H | -4.23556 | -0.57067 | 3.589996 |
| C | 0.637355 | -1.57865 | 0.910625 |
| N | 1.708113 | -1.80009 | 1.719271 |
| N | 0.117466 | -2.82389 | 0.681284 |
| C | 1.859512 | -3.16166 | 1.975375 |
| C | 2.61119  | -0.77079 | 2.217755 |
| C | -1.03888 | -2.91474 | -0.15181 |
| C | 0.855786 | -3.80256 | 1.324947 |
| H | 2.640491 | -3.54506 | 2.609701 |
| H | 2.910108 | -1.04976 | 3.232738 |
| H | 2.053427 | 0.160941 | 2.272261 |
| C | -1.48145 | -1.67054 | -0.64108 |

|   |          |          |          |
|---|----------|----------|----------|
| C | -1.65549 | -4.1296  | -0.43563 |
| H | 0.607396 | -4.848   | 1.286393 |
| C | -2.61337 | -1.71677 | -1.46488 |
| C | -2.78135 | -4.12738 | -1.25818 |
| H | -1.28388 | -5.06327 | -0.02655 |
| C | -3.25587 | -2.91922 | -1.77038 |
| H | -3.00621 | -0.7892  | -1.86689 |
| H | -3.28205 | -5.06033 | -1.49094 |
| H | -4.13458 | -2.9146  | -2.40763 |
| C | 3.893775 | -0.84057 | -1.12218 |
| H | 4.596341 | -1.64794 | -0.86896 |
| H | 4.377415 | -0.24005 | -1.90151 |
| C | 3.889474 | 1.423678 | -0.09493 |
| H | 4.34795  | 1.800591 | 0.826294 |
| C | 3.869253 | -0.59673 | 1.351759 |
| H | 4.338506 | -1.58011 | 1.229282 |
| H | 4.611571 | 1.609319 | -0.90392 |
| H | 4.573905 | 0.016891 | 1.931074 |
| N | 3.652321 | -0.00491 | 0.041879 |

#### Ir-C

|    |          |          |          |
|----|----------|----------|----------|
| Ir | -0.4023  | 0.008127 | 0.001166 |
| C  | 0.62612  | -0.01531 | 1.792257 |
| N  | 1.768528 | 0.494365 | 2.327597 |
| N  | 0.121982 | -0.82902 | 2.767524 |
| C  | 1.9684   | 0.00519  | 3.6176   |
| C  | 2.670871 | 1.421318 | 1.652554 |
| C  | -1.06696 | -1.55666 | 2.462059 |
| C  | 0.932711 | -0.82755 | 3.890556 |
| H  | 2.806242 | 0.302839 | 4.224411 |
| H  | 2.835974 | 2.259405 | 2.335902 |
| H  | 2.141226 | 1.813091 | 0.792774 |
| C  | -1.53393 | -1.34366 | 1.150536 |
| C  | -1.68942 | -2.38667 | 3.388859 |
| H  | 0.709591 | -1.39417 | 4.776755 |
| C  | -2.7045  | -2.03483 | 0.811863 |
| C  | -2.84873 | -3.05957 | 3.005202 |
| H  | -1.29512 | -2.51091 | 4.391962 |
| C  | -3.35153 | -2.8804  | 1.716009 |
| H  | -3.12583 | -1.89533 | -0.17774 |



|   |          |          |          |
|---|----------|----------|----------|
| H | -3.35355 | -3.71127 | 3.709226 |
| H | -4.25665 | -3.39895 | 1.415942 |
| C | 0.629982 | -1.52677 | -0.89677 |
| N | 1.773681 | -2.26114 | -0.7533  |
| N | 0.071442 | -1.98771 | -2.11058 |
| C | 1.939183 | -3.14541 | -1.80538 |
| C | 2.686651 | -2.14411 | 0.376221 |
| C | -1.0698  | -1.4119  | -2.54636 |
| C | 0.885611 | -2.99077 | -2.66195 |
| H | 2.772215 | -3.82627 | -1.85262 |
| H | 2.862068 | -3.15621 | 0.753064 |
| H | 2.161228 | -1.60439 | 1.155007 |
| C | -1.57396 | -0.30457 | -1.66825 |
| C | -1.74211 | -1.80112 | -3.76397 |
| H | 0.648397 | -3.49936 | -3.57787 |
| C | -2.73211 | 0.318747 | -2.09735 |
| C | -2.87663 | -1.12854 | -4.1028  |
| H | -1.36426 | -2.61016 | -4.37741 |
| C | -3.39606 | -0.05882 | -3.28387 |
| H | -3.14313 | 1.123628 | -1.49903 |
| H | -3.41032 | -1.40237 | -5.00735 |
| H | -4.30282 | 0.447488 | -3.59217 |
| C | 0.614838 | 1.56473  | -0.89172 |
| N | 1.756853 | 1.777764 | -1.59854 |
| N | 0.089791 | 2.812337 | -0.69803 |
| C | 1.938008 | 3.137372 | -1.84221 |
| C | 2.661464 | 0.726519 | -2.05551 |
| C | -1.09728 | 2.911146 | 0.089623 |
| C | 0.889344 | 3.785443 | -1.27377 |
| H | 2.772066 | 3.516436 | -2.40754 |
| H | 2.813838 | 0.88009  | -3.12758 |
| H | 2.132091 | -0.21193 | -1.93656 |
| C | -1.54713 | 1.673553 | 0.590154 |
| C | -1.72968 | 4.127214 | 0.32879  |
| H | 0.651571 | 4.833739 | -1.24587 |
| C | -2.70293 | 1.729546 | 1.37939  |
| C | -2.87929 | 4.134491 | 1.11784  |
| H | -1.35155 | 5.054274 | -0.08925 |
| C | -3.36067 | 2.934173 | 1.641551 |
| H | -3.10175 | 0.808206 | 1.789383 |

|   |          |          |          |
|---|----------|----------|----------|
| H | -3.39226 | 5.06866  | 1.316503 |
| H | -4.25661 | 2.937081 | 2.254333 |
| C | 4.04867  | 0.858017 | 1.264024 |
| H | 4.691701 | 1.741331 | 1.171471 |
| H | 4.444295 | 0.299844 | 2.121358 |
| C | 4.324867 | 0.013024 | -0.01213 |
| C | 4.060299 | -1.51631 | 0.081179 |
| H | 4.455736 | -1.97618 | -0.83258 |
| C | 4.043324 | 0.692208 | -1.38178 |
| H | 4.427807 | 1.718341 | -1.329   |
| H | 4.708041 | -1.87381 | 0.890798 |
| H | 4.690745 | 0.17607  | -2.10014 |
| H | 5.424256 | 0.020239 | -0.01346 |

Ir-Ph

|    |          |          |          |
|----|----------|----------|----------|
| Ir | -0.87182 | 0.086923 | 0.048151 |
| C  | 0.306396 | 0.495488 | 1.720771 |
| N  | 1.266514 | 1.391878 | 2.082717 |
| N  | -0.14205 | -0.02437 | 2.905213 |
| C  | 1.397035 | 1.438534 | 3.467284 |
| C  | 1.809766 | 2.377235 | 1.144686 |
| C  | -1.3403  | -0.79731 | 2.874517 |
| C  | 0.518576 | 0.544278 | 3.983154 |
| H  | 2.09236  | 2.091371 | 3.963877 |
| H  | 1.089951 | 3.196997 | 1.059878 |
| H  | 1.844743 | 1.880352 | 0.177502 |
| C  | -1.9701  | -0.81712 | 1.615318 |
| C  | -1.83916 | -1.43609 | 4.00625  |
| H  | 0.305873 | 0.285875 | 5.004962 |
| C  | -3.17979 | -1.52131 | 1.559935 |
| C  | -3.04779 | -2.1239  | 3.904705 |
| H  | -1.3088  | -1.40357 | 4.952345 |
| C  | -3.71725 | -2.15875 | 2.681057 |
| H  | -3.71713 | -1.56619 | 0.618894 |
| H  | -3.45966 | -2.6243  | 4.773823 |
| H  | -4.66296 | -2.68539 | 2.600824 |
| C  | -0.4987  | -1.91632 | -0.43942 |
| N  | 0.241506 | -2.96668 | 0.000453 |
| N  | -1.3872  | -2.47186 | -1.31848 |

|   |          |          |          |
|---|----------|----------|----------|
| C | -0.19238 | -4.15668 | -0.57886 |
| C | 1.364007 | -2.85318 | 0.928902 |
| C | -2.37114 | -1.62079 | -1.89786 |
| C | -1.21714 | -3.84296 | -1.40855 |
| H | 0.259755 | -5.10733 | -0.3579  |
| H | 1.039388 | -3.16027 | 1.927679 |
| H | 1.60224  | -1.79145 | 0.975189 |
| C | -2.34684 | -0.30758 | -1.39422 |
| C | -3.26986 | -2.07053 | -2.86084 |
| H | -1.82984 | -4.47182 | -2.029   |
| C | -3.31778 | 0.555615 | -1.91814 |
| C | -4.21423 | -1.17461 | -3.35983 |
| H | -3.24701 | -3.09325 | -3.22182 |
| C | -4.23506 | 0.136925 | -2.88422 |
| H | -3.36909 | 1.574623 | -1.55045 |
| H | -4.92751 | -1.50186 | -4.10776 |
| H | -4.97588 | 0.834308 | -3.26204 |
| C | 0.155429 | 1.088682 | -1.43004 |
| N | 0.969663 | 0.848891 | -2.50526 |
| N | -0.19987 | 2.453117 | -1.56198 |
| C | 1.134315 | 1.985942 | -3.26924 |
| C | 1.430839 | -0.49705 | -2.83708 |
| C | -1.07091 | 2.974866 | -0.67124 |
| C | 0.4333   | 3.004754 | -2.68345 |
| H | 1.73555  | 1.999741 | -4.16128 |
| H | 0.644922 | -1.0099  | -3.40166 |
| H | 1.530391 | -1.01665 | -1.88503 |
| C | -1.59003 | 1.995011 | 0.325046 |
| C | -1.44484 | 4.369398 | -0.64502 |
| H | 0.307459 | 4.028316 | -2.9845  |
| C | -2.46065 | 2.498098 | 1.273872 |
| C | -2.30658 | 4.778273 | 0.331251 |
| H | -1.06174 | 5.064682 | -1.38227 |
| C | -2.83368 | 3.860681 | 1.304453 |
| H | -2.87703 | 1.820024 | 2.010698 |
| H | -2.60929 | 5.819765 | 0.373457 |
| H | -3.5234  | 4.225306 | 2.056188 |
| C | 3.184228 | 2.928507 | 1.519129 |
| C | 2.574021 | -3.67728 | 0.456235 |
| C | 2.74641  | -0.5582  | -3.61635 |

|   |          |          |          |
|---|----------|----------|----------|
| C | 4.104599 | -1.43094 | -0.98653 |
| C | 4.119663 | -1.68313 | 0.387035 |
| C | 4.191567 | -0.60049 | 1.264113 |
| C | 4.254345 | 0.712188 | 0.796659 |
| C | 4.214665 | 0.932223 | -0.58205 |
| C | 4.120342 | -0.12627 | -1.48582 |
| H | 4.029248 | -2.26345 | -1.67943 |
| H | 4.163844 | -0.7808  | 2.33453  |
| H | 4.213029 | 1.948861 | -0.96245 |
| C | 3.957959 | 0.14772  | -2.9656  |
| C | 3.92386  | -3.08989 | 0.910986 |
| C | 4.27588  | 1.866284 | 1.772908 |
| H | 4.168656 | 1.463923 | 2.783233 |
| H | 5.252742 | 2.362086 | 1.745089 |
| H | 3.113721 | 3.581133 | 2.395468 |
| H | 3.48075  | 3.580659 | 0.69179  |
| H | 3.984224 | -3.08779 | 2.003778 |
| H | 4.726117 | -3.74505 | 0.554891 |
| H | 2.489554 | -4.71283 | 0.800632 |
| H | 2.559946 | -3.71164 | -0.63648 |
| H | 4.859859 | -0.16101 | -3.50682 |
| H | 3.869672 | 1.227265 | -3.10863 |
| H | 2.610622 | -0.1604  | -4.62756 |
| H | 2.966876 | -1.62225 | -3.74948 |

#### Ir-N-CN

|    |          |          |          |
|----|----------|----------|----------|
| Ir | -0.03205 | -0.05585 | -0.35989 |
| C  | 0.944867 | 1.522185 | 0.546415 |
| N  | 1.853606 | 1.700605 | 1.551199 |
| N  | 0.686451 | 2.773138 | 0.068141 |
| C  | 2.151362 | 3.035003 | 1.707548 |
| C  | 2.392819 | 0.649446 | 2.412985 |
| C  | -0.26342 | 2.879703 | -1.00418 |
| C  | 1.424245 | 3.725283 | 0.779649 |
| H  | 2.855123 | 3.401469 | 2.435337 |
| H  | 3.41751  | 0.929032 | 2.67079  |
| H  | 2.438567 | -0.26601 | 1.833013 |
| C  | -0.79225 | 1.637369 | -1.39811 |
| C  | -0.6098  | 4.094194 | -1.5917  |
| C  | -1.72625 | 1.678128 | -2.44021 |

|   |          |          |          |
|---|----------|----------|----------|
| C | -1.54146 | 4.085469 | -2.62728 |
| H | -0.17383 | 5.030561 | -1.27251 |
| C | -2.09804 | 2.87853  | -3.04767 |
| H | -2.1616  | 0.751391 | -2.79449 |
| H | -1.82297 | 5.01856  | -3.10079 |
| H | -2.81993 | 2.87101  | -3.85758 |
| C | -1.77818 | -0.07695 | 0.730495 |
| N | -2.29779 | 0.526066 | 1.840537 |
| N | -2.79471 | -0.84259 | 0.232033 |
| C | -3.60226 | 0.1363   | 2.046335 |
| C | -1.57478 | 1.442952 | 2.718861 |
| C | -2.53308 | -1.55738 | -0.98478 |
| C | -3.93145 | -0.72567 | 1.03902  |
| H | -4.20577 | 0.496823 | 2.861847 |
| H | -2.29801 | 2.164842 | 3.10757  |
| H | -0.85724 | 1.985323 | 2.109431 |
| C | -1.23772 | -1.33451 | -1.49265 |
| C | -3.46976 | -2.38191 | -1.60166 |
| C | -0.9235  | -1.98649 | -2.69035 |
| C | -3.11127 | -3.01701 | -2.78956 |
| H | -4.45724 | -2.53663 | -1.18962 |
| C | -1.84133 | -2.81867 | -3.33104 |
| H | 0.055419 | -1.83293 | -3.12896 |
| H | -3.82763 | -3.66022 | -3.2869  |
| H | -1.56742 | -3.31217 | -4.25739 |
| C | 0.972196 | -1.56959 | 0.480558 |
| N | 0.81979  | -2.40865 | 1.535085 |
| N | 2.192117 | -1.92168 | -0.12158 |
| C | 1.917613 | -3.25853 | 1.713417 |
| C | -0.26249 | -2.35886 | 2.504511 |
| C | 2.53224  | -1.23432 | -1.30464 |
| C | 2.830001 | -2.94248 | 0.584155 |
| H | 1.762623 | -4.24804 | 2.12867  |
| H | -0.48286 | -3.38799 | 2.806306 |
| H | -1.14446 | -1.95919 | 2.013422 |
| C | 1.600335 | -0.23264 | -1.66601 |
| C | 3.681368 | -1.51687 | -2.0502  |
| C | 1.884971 | 0.489831 | -2.82452 |
| C | 3.922    | -0.77184 | -3.20099 |
| H | 4.370709 | -2.29517 | -1.75432 |

|   |          |          |          |
|---|----------|----------|----------|
| C | 3.028466 | 0.228284 | -3.587   |
| H | 1.199103 | 1.264565 | -3.14662 |
| H | 4.805936 | -0.97686 | -3.79364 |
| H | 3.21984  | 0.80431  | -4.48625 |
| C | 1.584413 | 0.450712 | 3.706252 |
| H | 2.189404 | -0.19637 | 4.355302 |
| H | 1.511909 | 1.420156 | 4.21264  |
| C | -0.87621 | 0.740912 | 3.894842 |
| H | -1.62589 | 0.145977 | 4.428922 |
| C | 0.098517 | -1.54126 | 3.755723 |
| H | 1.032433 | -1.94842 | 4.157582 |
| H | -0.55693 | 1.531438 | 4.587849 |
| H | -0.67976 | -1.73178 | 4.506899 |
| N | 0.250741 | -0.10716 | 3.543585 |
| C | -5.17832 | -1.36057 | 0.855149 |
| N | -6.21428 | -1.86287 | 0.749932 |
| C | 4.075734 | -3.47489 | 0.368282 |
| N | 5.12622  | -3.98535 | 0.238043 |
| C | 1.428865 | 5.123212 | 0.586019 |
| N | 1.460735 | 6.273442 | 0.474351 |

Ir-N-F

|    |          |          |          |
|----|----------|----------|----------|
| Ir | 0.081614 | 0.038705 | -0.39318 |
| C  | -0.59225 | 1.702575 | 0.574827 |
| N  | -0.38067 | 2.422402 | 1.73862  |
| N  | -1.63344 | 2.390988 | -0.0938  |
| C  | -1.24421 | 3.50091  | 1.808028 |
| C  | 0.650657 | 2.130679 | 2.716332 |
| C  | -2.10822 | 1.865775 | -1.30025 |
| C  | -1.9978  | 3.469769 | 0.677391 |
| H  | -1.23971 | 4.219788 | 2.608726 |
| H  | 1.063712 | 3.078729 | 3.077945 |
| H  | 1.447906 | 1.595625 | 2.205948 |
| C  | -1.46592 | 0.648849 | -1.67715 |
| C  | -3.14078 | 2.448982 | -2.05805 |
| C  | -1.93765 | 0.032163 | -2.834   |
| C  | -3.55785 | 1.801393 | -3.21283 |
| H  | -3.59785 | 3.382    | -1.75724 |
| C  | -2.96577 | 0.592868 | -3.60491 |
| H  | -1.47856 | -0.89596 | -3.15663 |

|   |          |          |          |
|---|----------|----------|----------|
| H | -4.34735 | 2.240533 | -3.81296 |
| H | -3.29546 | 0.098968 | -4.51255 |
| C | -1.31188 | -1.27703 | 0.516858 |
| N | -2.26155 | -1.26072 | 1.480212 |
| N | -1.36412 | -2.54385 | -0.01483 |
| C | -2.90363 | -2.4984  | 1.581019 |
| C | -2.51057 | -0.17153 | 2.418787 |
| C | -0.43819 | -2.86962 | -1.05771 |
| C | -2.33124 | -3.27534 | 0.635197 |
| H | -3.70577 | -2.70116 | 2.267563 |
| H | -3.57989 | -0.17277 | 2.648763 |
| H | -2.26896 | 0.760362 | 1.916013 |
| C | 0.395874 | -1.79596 | -1.40876 |
| C | -0.37818 | -4.13047 | -1.64819 |
| C | 1.336044 | -2.06129 | -2.41347 |
| C | 0.569113 | -4.34687 | -2.64669 |
| H | -1.04757 | -4.92556 | -1.34987 |
| C | 1.423318 | -3.31204 | -3.02601 |
| H | 1.999861 | -1.26711 | -2.73453 |
| H | 0.633095 | -5.31803 | -3.12378 |
| H | 2.157191 | -3.47787 | -3.80807 |
| C | 1.740733 | -0.35512 | 0.765192 |
| N | 2.111288 | -1.06345 | 1.866316 |
| N | 2.905463 | 0.269163 | 0.323636 |
| C | 3.472171 | -0.89932 | 2.135431 |
| C | 1.209795 | -1.86532 | 2.679344 |
| C | 2.833339 | 0.997944 | -0.87229 |
| C | 3.945585 | -0.08511 | 1.16417  |
| H | 3.978916 | -1.37367 | 2.956601 |
| H | 1.758936 | -2.74792 | 3.023469 |
| H | 0.402675 | -2.20531 | 2.033102 |
| C | 1.508016 | 1.018753 | -1.45088 |
| C | 3.927475 | 1.635012 | -1.46806 |
| C | 1.371215 | 1.730846 | -2.6564  |
| C | 3.722501 | 2.325336 | -2.65605 |
| H | 4.91114  | 1.596128 | -1.02011 |
| C | 2.444244 | 2.387619 | -3.25079 |
| H | 0.396865 | 1.756403 | -3.12925 |
| H | 4.56335  | 2.819053 | -3.13105 |
| H | 2.306363 | 2.937659 | -4.17445 |

|   |          |          |          |
|---|----------|----------|----------|
| C | 0.149549 | 1.313794 | 3.918328 |
| H | 0.96629  | 1.291781 | 4.654215 |
| H | -0.67797 | 1.86245  | 4.384685 |
| C | -1.70803 | -0.31376 | 3.723632 |
| H | -1.85177 | -1.33248 | 4.102152 |
| C | 0.639841 | -1.12674 | 3.904119 |
| H | 1.4808   | -0.73965 | 4.490613 |
| H | -2.1691  | 0.362494 | 4.458395 |
| H | 0.147161 | -1.8868  | 4.528269 |
| N | -0.28464 | -0.04164 | 3.61553  |
| F | -2.60519 | -4.53331 | 0.310354 |
| F | 5.179291 | 0.382123 | 0.987025 |
| F | -2.94841 | 4.32181  | 0.298432 |

Ir-N-Ph

|    |          |          |          |
|----|----------|----------|----------|
| Ir | -0.00698 | -0.06296 | -0.29754 |
| C  | -0.20854 | 1.764314 | 0.622387 |
| N  | 0.353196 | 2.442018 | 1.655737 |
| N  | -1.08002 | 2.653675 | 0.044884 |
| C  | -0.15696 | 3.734018 | 1.726616 |
| C  | 1.363525 | 1.914837 | 2.565143 |
| C  | -1.85914 | 2.153857 | -1.0546  |
| C  | -1.04476 | 3.88809  | 0.707636 |
| H  | 0.202004 | 4.461692 | 2.434358 |
| H  | 2.016817 | 2.745225 | 2.849106 |
| H  | 1.960775 | 1.192027 | 2.01601  |
| C  | -1.4883  | 0.854836 | -1.45893 |
| C  | -2.91439 | 2.855359 | -1.63479 |
| C  | -2.19318 | 0.314591 | -2.53985 |
| C  | -3.59918 | 2.27446  | -2.70182 |
| H  | -3.21475 | 3.827416 | -1.27268 |
| C  | -3.22983 | 1.011423 | -3.1621  |
| H  | -1.92633 | -0.67543 | -2.89201 |
| H  | -4.41955 | 2.811478 | -3.16447 |
| H  | -3.75958 | 0.563973 | -3.99688 |
| C  | -1.40245 | -1.13656 | 0.665423 |
| N  | -2.21633 | -0.98107 | 1.755774 |
| N  | -1.72672 | -2.37431 | 0.130104 |
| C  | -2.99466 | -2.10629 | 1.988703 |
| C  | -2.22525 | 0.171653 | 2.641323 |



|   |          |          |          |
|---|----------|----------|----------|
| C | -0.86077 | -2.84877 | -0.89808 |
| C | -2.83024 | -2.95027 | 0.783904 |
| H | -3.90177 | -2.02197 | 2.570045 |
| H | -3.25996 | 0.335703 | 2.959687 |
| H | -1.90797 | 1.038793 | 2.068883 |
| C | 0.030615 | -1.86682 | -1.37868 |
| C | -0.82225 | -4.17991 | -1.31396 |
| C | 0.899289 | -2.26763 | -2.39795 |
| C | 0.072645 | -4.54108 | -2.32115 |
| H | -1.46642 | -4.92483 | -0.86611 |
| C | 0.914468 | -3.58062 | -2.87974 |
| H | 1.58765  | -1.54116 | -2.81609 |
| H | 0.106056 | -5.56964 | -2.66283 |
| H | 1.596786 | -3.85762 | -3.67727 |
| C | 1.699283 | -0.74336 | 0.629982 |
| N | 2.010311 | -1.52914 | 1.6911   |
| N | 2.901635 | -0.42421 | 0.055006 |
| C | 3.386593 | -1.70591 | 1.777806 |
| C | 1.060089 | -2.09648 | 2.639184 |
| C | 2.852543 | 0.496742 | -1.04771 |
| C | 3.959236 | -1.03364 | 0.743231 |
| H | 3.84225  | -2.35518 | 2.505854 |
| H | 1.448904 | -3.06821 | 2.956867 |
| H | 0.124357 | -2.26837 | 2.114944 |
| C | 1.539772 | 0.807503 | -1.45428 |
| C | 3.987239 | 1.068915 | -1.62036 |
| C | 1.426931 | 1.695525 | -2.53136 |
| C | 3.826614 | 1.953283 | -2.6862  |
| H | 4.978909 | 0.84905  | -1.25362 |
| C | 2.547083 | 2.255051 | -3.14866 |
| H | 0.438468 | 1.954838 | -2.89328 |
| H | 4.700537 | 2.40151  | -3.14531 |
| H | 2.42094  | 2.934557 | -3.98574 |
| C | 0.783836 | 1.274682 | 3.837908 |
| H | 1.622236 | 1.14357  | 4.537599 |
| H | 0.100683 | 1.995879 | 4.301414 |
| C | -1.34296 | -0.0107  | 3.888539 |
| H | -1.61569 | -0.96398 | 4.354426 |
| C | 0.832431 | -1.21473 | 3.879081 |
| H | 1.810961 | -0.96915 | 4.307524 |

|   |          |          |          |
|---|----------|----------|----------|
| H | -1.62076 | 0.780758 | 4.599675 |
| H | 0.311843 | -1.83753 | 4.620683 |
| N | 0.090097 | 0.013172 | 3.649863 |
| C | 5.371493 | -1.0862  | 0.329977 |
| C | 5.720642 | -1.61903 | -0.91925 |
| C | 6.383654 | -0.66936 | 1.20081  |
| C | 7.056807 | -1.72094 | -1.28956 |
| H | 4.938489 | -1.94426 | -1.59533 |
| C | 7.723433 | -0.77964 | 0.830002 |
| H | 6.115292 | -0.24754 | 2.162791 |
| C | 8.062455 | -1.3018  | -0.41618 |
| H | 7.315286 | -2.13207 | -2.25873 |
| H | 8.49956  | -0.44984 | 1.511404 |
| H | 9.103532 | -1.38226 | -0.70751 |
| C | -1.69843 | 5.139286 | 0.287412 |
| C | -2.55129 | 5.824409 | 1.159127 |
| C | -1.42251 | 5.690258 | -0.97225 |
| C | -3.12214 | 7.038648 | 0.778809 |
| H | -2.77529 | 5.395122 | 2.129067 |
| C | -1.99872 | 6.89723  | -1.35197 |
| H | -0.76237 | 5.161734 | -1.65005 |
| C | -2.85033 | 7.575387 | -0.47758 |
| H | -3.78527 | 7.558604 | 1.460967 |
| H | -1.78069 | 7.312123 | -2.32945 |
| H | -3.29899 | 8.516021 | -0.77605 |
| C | -3.78386 | -3.84582 | 0.298817 |
| C | -3.92947 | -4.20345 | -1.08831 |
| C | -4.75281 | -4.39629 | 1.216067 |
| C | -4.91888 | -5.06861 | -1.49408 |
| H | -3.27981 | -3.75123 | -1.82356 |
| C | -5.72857 | -5.27035 | 0.7827   |
| H | -4.68788 | -4.15118 | 2.269393 |
| C | -5.82517 | -5.63026 | -0.5707  |
| H | -5.0142  | -5.30464 | -2.54862 |
| H | -6.42983 | -5.68322 | 1.50028  |
| H | -6.59693 | -6.313   | -0.90478 |

HB-Ir

|   |          |         |          |
|---|----------|---------|----------|
| C | -0.05245 | -3.4138 | 3.224698 |
|---|----------|---------|----------|

|    |          |          |          |
|----|----------|----------|----------|
| C  | -0.45934 | -2.22152 | 2.591582 |
| C  | 0.239871 | -1.7453  | 1.485359 |
| C  | 1.34489  | -2.54045 | 1.082664 |
| C  | 1.054377 | -4.0989  | 2.733624 |
| H  | -0.57627 | -3.79668 | 4.092067 |
| H  | -1.30804 | -1.66588 | 2.972711 |
| H  | 1.400931 | -5.01294 | 3.204997 |
| C  | 3.128998 | -2.58103 | -0.75252 |
| C  | 3.341948 | -1.67647 | -1.81537 |
| C  | 1.537761 | -0.92931 | -0.65597 |
| N  | 2.354152 | -0.70165 | -1.72463 |
| N  | 2.007938 | -2.09493 | -0.06043 |
| Ir | -0.02245 | -0.02791 | 0.352666 |
| C  | 1.384586 | 0.958606 | 1.488841 |
| C  | 1.671455 | 2.278899 | 1.053337 |
| C  | 2.10777  | 0.526774 | 2.605763 |
| C  | 3.074219 | 1.376678 | 3.179979 |
| H  | 1.918987 | -0.45176 | 3.027926 |
| C  | 3.258629 | 2.652601 | 2.657531 |
| H  | 3.658781 | 1.063184 | 4.036413 |
| H  | 3.976596 | 3.33655  | 3.098806 |
| C  | 0.811178 | 3.975045 | -0.66103 |
| C  | -0.23002 | 3.839859 | -1.60006 |
| N  | -0.68969 | 2.526864 | -1.50948 |
| N  | 0.925542 | 2.716058 | -0.04121 |
| C  | 0.003734 | 1.826807 | -0.57229 |
| C  | -1.62265 | 0.667468 | 1.51042  |
| C  | -2.89445 | 0.223117 | 1.108178 |
| C  | -1.63584 | 1.503083 | 2.628145 |
| C  | -2.84214 | 1.840165 | 3.253262 |
| H  | -0.6995  | 1.883293 | 3.021439 |
| C  | -4.02943 | 1.329308 | 2.748916 |
| H  | -2.86005 | 2.484153 | 4.124511 |
| H  | -4.98811 | 1.557386 | 3.201029 |
| C  | -3.92457 | -1.32867 | -0.6843  |
| C  | -3.28168 | -2.07229 | -1.68532 |
| C  | -1.67241 | -0.92198 | -0.57312 |
| N  | -1.91372 | -1.79468 | -1.57787 |
| N  | -2.89354 | -0.63373 | -0.02111 |
| C  | -3.9608  | -2.8979  | -2.574   |

|   |          |          |          |
|---|----------|----------|----------|
| C | -5.32382 | -1.38845 | -0.5328  |
| C | 1.503386 | 5.196358 | -0.52096 |
| C | -0.63525 | 4.880276 | -2.42765 |
| C | 3.978184 | -3.69591 | -0.57103 |
| C | 4.38309  | -1.82242 | -2.72438 |
| C | -5.34535 | -2.95358 | -2.41946 |
| H | -5.92878 | -3.58268 | -3.08151 |
| C | -6.00547 | -2.22139 | -1.43098 |
| H | -7.08187 | -2.27977 | -1.32769 |
| H | -3.44462 | -3.46676 | -3.33549 |
| C | 5.215425 | -2.92962 | -2.54033 |
| H | 6.04368  | -3.0851  | -3.2221  |
| C | 5.020702 | -3.83931 | -1.50232 |
| H | 5.68134  | -4.68759 | -1.37616 |
| H | 4.550344 | -1.11282 | -3.52328 |
| C | 0.055148 | 6.086774 | -2.28558 |
| H | -0.2248  | 6.931191 | -2.90482 |
| C | 1.091134 | 6.241593 | -1.36603 |
| H | 1.610612 | 7.186594 | -1.26966 |
| H | -1.44643 | 4.767711 | -3.13425 |
| C | -0.91062 | -2.41515 | -2.42768 |
| H | 0.062711 | -2.01518 | -2.16169 |
| H | -0.91204 | -3.49687 | -2.27739 |
| H | -1.12481 | -2.19885 | -3.47706 |
| C | 2.303428 | 0.479045 | -2.56762 |
| H | 1.311165 | 0.917577 | -2.49388 |
| H | 3.041258 | 1.218394 | -2.24422 |
| H | 2.50278  | 0.200614 | -3.60385 |
| C | -1.78504 | 1.998905 | -2.30253 |
| H | -1.77225 | 0.914535 | -2.23528 |
| H | -2.7446  | 2.369405 | -1.93309 |
| H | -1.66313 | 2.297775 | -3.3457  |
| O | 2.501851 | 5.414254 | 0.334762 |
| H | 2.640702 | 4.586781 | 0.908064 |
| N | 2.564666 | 3.130056 | 1.611862 |
| O | 3.855335 | -4.59595 | 0.403142 |
| H | 3.060305 | -4.35477 | 0.989858 |
| O | -6.02649 | -0.71485 | 0.387079 |
| H | -5.39677 | -0.18933 | 0.964656 |
| N | 1.760695 | -3.68446 | 1.67303  |

|   |          |          |          |
|---|----------|----------|----------|
| N | -4.05843 | 0.518699 | 1.677755 |
|---|----------|----------|----------|

HB-Ir-  
CN

|    |          |          |          |
|----|----------|----------|----------|
| C  | 2.124429 | -2.66891 | 3.54436  |
| C  | 1.086978 | -1.9644  | 2.922991 |
| C  | 1.330995 | -1.17446 | 1.798932 |
| C  | 2.673759 | -1.17464 | 1.382703 |
| C  | 3.408171 | -2.57511 | 3.026685 |
| H  | 1.940816 | -3.27978 | 4.420152 |
| H  | 0.081489 | -2.02471 | 3.324962 |
| H  | 4.245934 | -3.09892 | 3.472423 |
| C  | 4.13312  | -0.05214 | -0.43    |
| C  | 3.756593 | 0.839823 | -1.44663 |
| C  | 1.869249 | 0.27817  | -0.3206  |
| N  | 2.372153 | 1.007266 | -1.34451 |
| N  | 2.940732 | -0.37333 | 0.239762 |
| Ir | 0.048738 | 0.007746 | 0.639329 |
| C  | 0.434466 | 1.694878 | 1.746837 |
| C  | -0.31049 | 2.870161 | 1.304516 |
| C  | 1.259924 | 1.896765 | 2.841907 |
| C  | 1.34336  | 3.185686 | 3.4312   |
| H  | 1.839871 | 1.077107 | 3.245474 |
| C  | 0.574487 | 4.247385 | 2.911401 |
| H  | 1.985645 | 3.374623 | 4.282118 |
| H  | 0.633388 | 5.231145 | 3.3691   |
| C  | -2.03681 | 3.508368 | -0.43115 |
| C  | -2.64334 | 2.701319 | -1.42488 |
| N  | -2.06581 | 1.442031 | -1.34135 |
| N  | -1.11865 | 2.677536 | 0.231994 |
| C  | -1.12908 | 1.385897 | -0.35112 |
| C  | -1.63849 | -0.44159 | 1.792403 |
| C  | -2.34134 | -1.59317 | 1.398015 |
| C  | -2.19076 | 0.208084 | 2.897828 |
| C  | -3.348   | -0.28254 | 3.513217 |
| H  | -1.71147 | 1.099097 | 3.289316 |
| C  | -3.9433  | -1.43178 | 3.013726 |
| H  | -3.78019 | 0.217868 | 4.371491 |
| H  | -4.83928 | -1.85211 | 3.455732 |
| C  | -2.1288  | -3.47581 | -0.35814 |
| C  | -1.14687 | -3.66282 | -1.34315 |

|   |          |          |          |
|---|----------|----------|----------|
| C | -0.64429 | -1.7331  | -0.2587  |
| N | -0.26798 | -2.57846 | -1.24778 |
| N | -1.77949 | -2.27743 | 0.287753 |
| C | -1.13485 | -4.74441 | -2.21008 |
| C | -3.17969 | -4.40165 | -0.20254 |
| C | -2.40546 | 4.863223 | -0.26949 |
| C | -3.6204  | 3.182977 | -2.27683 |
| C | 5.480075 | -0.43554 | -0.27046 |
| C | 4.655767 | 1.398422 | -2.3416  |
| C | -2.18151 | -5.66399 | -2.05358 |
| C | -3.17481 | -5.49493 | -1.07708 |
| H | -3.97153 | -6.22016 | -0.9777  |
| H | -0.36883 | -4.88301 | -2.95952 |
| C | 5.994742 | 1.016638 | -2.17953 |
| C | 6.392946 | 0.124381 | -1.17202 |
| H | 7.433542 | -0.1534  | -1.0692  |
| H | 4.354351 | 2.089094 | -3.11602 |
| C | -3.9826  | 4.534302 | -2.11587 |
| C | -3.39341 | 5.352899 | -1.14366 |
| H | -3.69153 | 6.386841 | -1.03731 |
| H | -4.09744 | 2.566541 | -3.02523 |
| C | 0.906283 | -2.43334 | -2.09379 |
| H | 1.325351 | -1.44471 | -1.93885 |
| H | 1.653443 | -3.1881  | -1.83905 |
| H | 0.622502 | -2.54786 | -3.1419  |
| C | 1.609362 | 1.897912 | -2.20541 |
| H | 0.55538  | 1.769615 | -1.97623 |
| H | 1.89742  | 2.935533 | -2.02309 |
| H | 1.794617 | 1.651561 | -3.25305 |
| C | -2.45943 | 0.299706 | -2.14858 |
| H | -1.60596 | -0.36657 | -2.24996 |
| H | -3.28249 | -0.24479 | -1.67869 |
| H | -2.767   | 0.637282 | -3.13814 |
| O | -1.89314 | 5.687573 | 0.630185 |
| H | -1.20239 | 5.19045  | 1.206461 |
| N | -0.2479  | 4.139107 | 1.879846 |
| O | 5.933154 | -1.27902 | 0.659569 |
| H | 5.166915 | -1.58324 | 1.235943 |
| O | -4.15912 | -4.30672 | 0.699514 |
| H | -4.01451 | -3.48641 | 1.263178 |

|   |          |          |          |
|---|----------|----------|----------|
| N | 3.683917 | -1.82834 | 1.944259 |
| N | -3.43882 | -2.08965 | 1.956216 |
| C | -2.23664 | -6.80562 | -2.91509 |
| N | -2.27378 | -7.72306 | -3.61643 |
| C | -4.98676 | 5.080762 | -2.97484 |
| N | -5.79798 | 5.513895 | -3.6752  |
| C | 6.98175  | 1.551741 | -3.06725 |
| N | 7.771614 | 1.98737  | -3.78927 |

Pt-Ref

|    |          |          |          |
|----|----------|----------|----------|
| C  | -2.16439 | -1.96632 | -0.0432  |
| C  | -1.98436 | -3.34411 | 0.068333 |
| C  | -3.4982  | -1.53674 | -0.23827 |
| N  | -3.59945 | -0.13221 | -0.36531 |
| C  | -3.05272 | -4.25217 | 0.018303 |
| C  | -4.58352 | -2.40411 | -0.29121 |
| C  | -4.34555 | -3.77523 | -0.15854 |
| H  | -2.84679 | -5.3109  | 0.113362 |
| H  | -5.5936  | -2.03551 | -0.42522 |
| H  | -5.17513 | -4.47083 | -0.19683 |
| Pt | -0.79236 | -0.54829 | 0.23266  |
| C  | 0.663109 | -1.92395 | 0.28323  |
| C  | 0.462863 | -3.34613 | 0.19095  |
| C  | 1.998171 | -1.55286 | 0.165615 |
| C  | 1.516923 | -4.28245 | -0.00127 |
| C  | 3.057883 | -2.44233 | -0.14543 |
| C  | 2.79972  | -3.85031 | -0.19745 |
| H  | 1.257486 | -5.33284 | -0.04743 |
| H  | 3.600643 | -4.54827 | -0.40644 |
| O  | -0.7523  | -3.93855 | 0.219298 |
| C  | 0.074527 | 1.970471 | 1.684595 |
| C  | 1.956853 | 0.841533 | 0.896928 |
| C  | 0.834734 | 2.908302 | 2.332927 |
| H  | -1.00341 | 2.005208 | 1.731697 |
| C  | 2.780565 | 1.721025 | 1.592796 |
| C  | 2.236917 | 2.786615 | 2.309728 |
| H  | 0.341316 | 3.705986 | 2.873514 |
| H  | 3.846726 | 1.549445 | 1.601027 |
| H  | 2.875877 | 3.461876 | 2.863818 |
| N  | 0.590735 | 0.934488 | 0.944987 |

|   |          |          |          |
|---|----------|----------|----------|
| C | -4.65212 | 0.6759   | -0.76368 |
| C | -4.15371 | 1.932289 | -0.87966 |
| H | -4.6234  | 2.84963  | -1.18859 |
| H | -5.64263 | 0.301144 | -0.95013 |
| N | 2.512419 | -0.22888 | 0.165751 |
| C | 4.203412 | -1.66817 | -0.43715 |
| C | 3.833723 | -0.29203 | -0.28334 |
| C | 5.499288 | -1.99725 | -0.8931  |
| C | 6.376765 | -0.9789  | -1.20445 |
| C | 5.981742 | 0.375158 | -1.09395 |
| C | 4.714661 | 0.729273 | -0.6382  |
| H | 4.42071  | 1.768702 | -0.58221 |
| H | 6.675342 | 1.155795 | -1.38383 |
| H | 7.37431  | -1.21241 | -1.55818 |
| H | 5.788112 | -3.03572 | -1.00709 |
| N | -2.80096 | 1.872934 | -0.55324 |
| C | -2.4451  | 0.597427 | -0.20595 |
| C | -1.88884 | 2.964323 | -0.65115 |
| C | -0.68809 | 2.798202 | -1.33986 |
| C | -2.18001 | 4.17669  | -0.03098 |
| C | 0.228078 | 3.840551 | -1.37665 |
| H | -0.47034 | 1.847445 | -1.80885 |
| C | -1.25886 | 5.220395 | -0.09447 |
| H | -3.10768 | 4.293585 | 0.517749 |
| C | -0.03603 | 5.066144 | -0.75202 |
| H | 1.168429 | 3.698004 | -1.89859 |
| H | -1.48849 | 6.159773 | 0.39725  |
| C | 0.994462 | 6.167254 | -0.75968 |
| H | 0.556268 | 7.130475 | -0.49003 |
| H | 1.791814 | 5.949868 | -0.04116 |
| H | 1.460519 | 6.269058 | -1.7434  |

Pt-Iso

|   |          |          |          |
|---|----------|----------|----------|
| C | -3.55624 | 0.343698 | -0.08535 |
| C | -4.21488 | 1.546044 | -0.33633 |
| C | -4.38125 | -0.77543 | 0.166293 |
| N | -3.63362 | -1.9545  | 0.420257 |
| C | -5.61475 | 1.640663 | -0.35212 |
| C | -5.77099 | -0.72148 | 0.155625 |
| C | -6.38182 | 0.507808 | -0.10729 |



|    |          |          |          |
|----|----------|----------|----------|
| H  | -6.07323 | 2.60105  | -0.55241 |
| H  | -6.37172 | -1.60464 | 0.338045 |
| H  | -7.46285 | 0.578495 | -0.1201  |
| Pt | -1.60018 | -0.00135 | -0.2327  |
| C  | -1.23663 | 1.960503 | -0.40979 |
| C  | -2.24165 | 2.995843 | -0.50556 |
| C  | 0.038499 | 2.453298 | -0.22707 |
| C  | -1.9381  | 4.383816 | -0.46414 |
| C  | 0.38061  | 3.826994 | -0.08344 |
| C  | -0.65662 | 4.817187 | -0.24553 |
| H  | -2.76051 | 5.08283  | -0.55807 |
| H  | -0.42731 | 5.871787 | -0.16355 |
| O  | -3.57006 | 2.740461 | -0.58435 |
| C  | 0.70028  | -1.56311 | -1.47678 |
| C  | 1.46102  | 0.488586 | -0.71    |
| C  | 1.913545 | -1.87244 | -2.03413 |
| H  | -0.13179 | -2.24869 | -1.5449  |
| C  | 2.693536 | 0.26458  | -1.33022 |
| C  | 2.961807 | -0.92648 | -1.98946 |
| H  | 2.037112 | -2.83098 | -2.52134 |
| H  | 3.439256 | 1.046882 | -1.28961 |
| N  | 0.441806 | -0.40675 | -0.80308 |
| C  | -4.00659 | -3.19226 | 0.921677 |
| C  | -2.86023 | -3.88266 | 1.148279 |
| H  | -2.69927 | -4.86602 | 1.554262 |
| H  | -5.03099 | -3.47204 | 1.092091 |
| N  | 1.218076 | 1.679451 | -0.01272 |
| C  | 1.727016 | 3.905067 | 0.311858 |
| C  | 2.221967 | 2.556836 | 0.445302 |
| C  | 2.552213 | 4.994706 | 0.691433 |
| C  | 3.795108 | 4.718845 | 1.219382 |
| C  | 4.216506 | 3.388083 | 1.43457  |
| C  | 3.427936 | 2.273939 | 1.086592 |
| H  | 5.166031 | 3.221299 | 1.929502 |
| H  | 4.449455 | 5.530802 | 1.516692 |
| H  | 2.198963 | 6.013273 | 0.583818 |
| N  | -1.80063 | -3.05232 | 0.78379  |
| C  | -2.26924 | -1.85966 | 0.307196 |
| C  | -0.41543 | -3.3245  | 0.992992 |
| C  | 0.366304 | -2.39103 | 1.672686 |

|   |          |          |          |
|---|----------|----------|----------|
| C | 0.165521 | -4.48087 | 0.477104 |
| C | 1.731782 | -2.60646 | 1.805012 |
| H | -0.09358 | -1.48898 | 2.054988 |
| C | 1.534357 | -4.69164 | 0.633621 |
| H | -0.44269 | -5.19183 | -0.07065 |
| C | 2.341471 | -3.75486 | 1.285697 |
| H | 2.335114 | -1.86422 | 2.316559 |
| H | 1.983257 | -5.58662 | 0.215591 |
| C | 3.825336 | -3.97433 | 1.443757 |
| H | 4.222231 | -4.61471 | 0.65311  |
| H | 4.368119 | -3.02672 | 1.414334 |
| H | 4.050305 | -4.45284 | 2.403033 |
| C | 4.307952 | -1.19184 | -2.62865 |
| C | 4.183815 | -1.50219 | -4.13079 |
| C | 5.048566 | -2.32294 | -1.88931 |
| H | 4.904957 | -0.27872 | -2.52438 |
| H | 3.675356 | -0.69208 | -4.65914 |
| H | 5.172899 | -1.63796 | -4.57791 |
| H | 3.613846 | -2.42079 | -4.29758 |
| H | 5.190323 | -2.07513 | -0.83495 |
| H | 4.481855 | -3.25749 | -1.94052 |
| H | 6.031404 | -2.49905 | -2.33651 |
| C | 3.828934 | 0.880757 | 1.5574   |
| C | 3.725004 | 0.7931   | 3.09294  |
| C | 5.227634 | 0.457541 | 1.08016  |
| H | 3.116318 | 0.163477 | 1.151338 |
| H | 2.719495 | 1.054962 | 3.43154  |
| H | 3.949411 | -0.22292 | 3.434585 |
| H | 4.430431 | 1.472644 | 3.578779 |
| H | 5.30689  | 0.48585  | -0.00837 |
| H | 6.003374 | 1.110061 | 1.489756 |
| H | 5.448621 | -0.5629  | 1.407896 |

Pt-HB-ref

|   |          |          |          |
|---|----------|----------|----------|
| C | 2.202384 | -1.42477 | 0.044002 |
| C | 3.54672  | -1.06783 | 0.075822 |
| C | 1.94174  | -2.81185 | 0.031785 |
| N | 0.554266 | -3.10159 | -0.0411  |
| C | 4.578408 | -2.01476 | 0.123313 |
| C | 2.932479 | -3.78461 | 0.080348 |

|    |          |          |          |
|----|----------|----------|----------|
| C  | 4.26568  | -3.36868 | 0.129058 |
| H  | 5.605153 | -1.67137 | 0.150158 |
| H  | 2.687771 | -4.84015 | 0.0862   |
| H  | 5.059141 | -4.10513 | 0.167784 |
| Pt | 0.626368 | -0.20863 | 0.19975  |
| C  | 1.8106   | 1.404114 | 0.034756 |
| C  | 3.244145 | 1.359194 | -0.10492 |
| C  | 1.284792 | 2.665595 | -0.19021 |
| C  | 4.038952 | 2.486339 | -0.45764 |
| C  | 2.029915 | 3.795131 | -0.65534 |
| C  | 3.456083 | 3.684568 | -0.75965 |
| H  | 5.110126 | 2.343087 | -0.52835 |
| H  | 4.048524 | 4.532458 | -1.08095 |
| O  | 3.98803  | 0.239421 | 0.045455 |
| C  | -2.01315 | 0.498503 | 1.524199 |
| C  | -1.12074 | 2.416696 | 0.541624 |
| C  | -3.10593 | 1.171962 | 1.996225 |
| H  | -1.8866  | -0.55292 | 1.735426 |
| C  | -2.19114 | 3.166054 | 1.032159 |
| C  | -3.21656 | 2.562393 | 1.745789 |
| H  | -3.85135 | 0.635403 | 2.56865  |
| H  | -4.03143 | 3.150075 | 2.147854 |
| N  | -1.01793 | 1.058124 | 0.763261 |
| C  | -0.11455 | -4.28568 | -0.30325 |
| C  | -1.42192 | -3.96346 | -0.46209 |
| H  | -2.275   | -4.57353 | -0.70179 |
| H  | 0.381451 | -5.23717 | -0.37426 |
| N  | -0.08046 | 3.057994 | -0.15765 |
| C  | 1.128386 | 4.810075 | -0.9686  |
| C  | -0.16031 | 4.324567 | -0.6816  |
| N  | -1.52795 | -2.58283 | -0.29697 |
| C  | -0.30832 | -2.03597 | -0.0147  |
| C  | -2.72135 | -1.83027 | -0.51415 |
| C  | -2.68981 | -0.72311 | -1.36005 |
| C  | -3.90035 | -2.18711 | 0.133587 |
| C  | -3.83681 | 0.041136 | -1.52579 |
| H  | -1.76267 | -0.45342 | -1.84884 |
| C  | -5.04818 | -1.42096 | -0.05814 |
| H  | -3.91246 | -3.03976 | 0.803017 |
| C  | -5.03207 | -0.28765 | -0.87489 |

|   |          |          |          |
|---|----------|----------|----------|
| H | -3.8002  | 0.915185 | -2.16721 |
| H | -5.96162 | -1.69721 | 0.457812 |
| C | -6.24945 | 0.590169 | -1.02115 |
| H | -7.15782 | 0.07667  | -0.69907 |
| H | -6.14127 | 1.493676 | -0.41192 |
| H | -6.38798 | 0.90972  | -2.05739 |
| H | -2.19665 | 4.238564 | 0.894042 |
| H | -1.10964 | 4.813335 | -0.8128  |
| H | 1.348099 | 5.779575 | -1.38836 |

Pt-HB

|    |          |          |          |
|----|----------|----------|----------|
| C  | 2.531294 | -1.08647 | 0.045606 |
| C  | 3.782183 | -0.47705 | 0.064919 |
| C  | 2.531662 | -2.49432 | 0.027454 |
| N  | 1.218151 | -3.04254 | -0.03541 |
| C  | 4.969766 | -1.22141 | 0.09618  |
| C  | 3.684236 | -3.26844 | 0.057011 |
| C  | 4.915617 | -2.60894 | 0.095289 |
| H  | 5.915417 | -0.69392 | 0.116953 |
| H  | 3.639962 | -4.35083 | 0.05621  |
| H  | 5.833737 | -3.18338 | 0.120685 |
| Pt | 0.753309 | -0.1858  | 0.215738 |
| C  | 1.597968 | 1.607048 | 0.016573 |
| C  | 3.029019 | 1.848535 | -0.12649 |
| C  | 0.830306 | 2.741686 | -0.19914 |
| C  | 3.562871 | 3.103336 | -0.46128 |
| C  | 1.325216 | 4.012578 | -0.61381 |
| C  | 2.746492 | 4.185669 | -0.72252 |
| H  | 4.639955 | 3.188119 | -0.5408  |
| H  | 3.164406 | 5.141591 | -1.01127 |
| O  | 3.97412  | 0.885187 | 0.049887 |
| C  | -1.97531 | 0.027569 | 1.516245 |
| C  | -1.51266 | 2.03535  | 0.418333 |
| C  | -3.23655 | 0.446085 | 1.873209 |
| H  | -1.60767 | -0.94516 | 1.805318 |
| C  | -2.83243 | 2.51242  | 0.705394 |
| C  | -3.68621 | 1.696418 | 1.436654 |
| H  | -3.86822 | -0.20319 | 2.464259 |
| H  | -4.67382 | 2.072744 | 1.670422 |
| N  | -1.12874 | 0.772218 | 0.763624 |

|   |          |          |          |
|---|----------|----------|----------|
| C | 0.784648 | -4.32785 | -0.31005 |
| C | -0.56176 | -4.2571  | -0.46079 |
| H | -1.286   | -5.01426 | -0.70473 |
| H | 1.451513 | -5.16733 | -0.39377 |
| N | -0.57264 | 2.879707 | -0.15626 |
| C | 0.220806 | 4.80984  | -0.8408  |
| N | -0.92342 | -2.9229  | -0.27841 |
| C | 0.172113 | -2.16304 | 0.005159 |
| C | -2.23418 | -2.39534 | -0.49402 |
| C | -2.39745 | -1.29707 | -1.33777 |
| C | -3.33098 | -2.956   | 0.151825 |
| C | -3.65839 | -0.73933 | -1.49518 |
| H | -1.53344 | -0.86936 | -1.82981 |
| C | -4.59369 | -2.39534 | -0.03054 |
| H | -3.19414 | -3.8022  | 0.815539 |
| C | -4.77554 | -1.26996 | -0.83876 |
| H | -3.77527 | 0.132661 | -2.12952 |
| H | -5.44418 | -2.8266  | 0.486547 |
| C | -6.12309 | -0.60801 | -0.97322 |
| H | -6.92429 | -1.2401  | -0.58514 |
| H | -6.13799 | 0.335592 | -0.41757 |
| H | -6.34867 | -0.37323 | -2.01679 |
| H | 0.162621 | 5.829577 | -1.18679 |
| O | -3.27266 | 3.717725 | 0.322967 |
| H | -2.50864 | 4.180793 | -0.13393 |
| N | -0.94632 | 4.12671  | -0.58343 |

### **<sup>3</sup>MC state**

#### Irpmi

|    |          |          |          |
|----|----------|----------|----------|
| Ir | -0.4834  | 0.199668 | -0.03968 |
| C  | 0.854616 | 0.372084 | -1.54852 |
| N  | 1.160572 | -0.24048 | -2.73103 |
| N  | 1.731576 | 1.431408 | -1.47247 |
| C  | 2.202778 | 0.41716  | -3.36237 |
| C  | 0.580853 | -1.49922 | -3.16905 |
| C  | 1.668125 | 2.240622 | -0.30719 |
| C  | 2.558556 | 1.468138 | -2.57463 |
| H  | 2.593743 | 0.09438  | -4.31224 |
| H  | 0.730191 | -1.60888 | -4.24347 |
| H  | -0.48469 | -1.49761 | -2.9471  |

|   |          |          |          |
|---|----------|----------|----------|
| C | 0.662645 | 1.824506 | 0.58736  |
| C | 2.543271 | 3.292187 | -0.0645  |
| H | 3.309829 | 2.223597 | -2.72107 |
| C | 0.596797 | 2.534877 | 1.792324 |
| C | 2.436256 | 3.977574 | 1.146347 |
| H | 3.302548 | 3.57506  | -0.78595 |
| C | 1.466432 | 3.592615 | 2.073854 |
| H | -0.14532 | 2.247193 | 2.530152 |
| H | 3.107593 | 4.800945 | 1.3619   |
| H | 1.389344 | 4.118823 | 3.019901 |
| C | -1.77226 | -1.31934 | -0.59668 |
| N | -1.7767  | -2.66926 | -0.73723 |
| N | -3.08312 | -0.95215 | -0.76027 |
| C | -3.06529 | -3.13353 | -0.98583 |
| C | -0.62218 | -3.53296 | -0.51081 |
| C | -3.39644 | 0.413455 | -0.53481 |
| C | -3.88789 | -2.05509 | -1.00077 |
| H | -3.28009 | -4.17922 | -1.12544 |
| H | -0.746   | -4.0762  | 0.428452 |
| H | 0.285031 | -2.9322  | -0.44246 |
| C | -2.29094 | 1.194461 | -0.11657 |
| C | -4.67361 | 0.932619 | -0.69921 |
| H | -4.95003 | -1.98825 | -1.15518 |
| C | -2.54648 | 2.552086 | 0.131775 |
| C | -4.88665 | 2.28736  | -0.43666 |
| H | -5.49622 | 0.305687 | -1.02589 |
| C | -3.8239  | 3.091781 | -0.0224  |
| H | -1.73154 | 3.190898 | 0.449152 |
| H | -5.8783  | 2.707922 | -0.55825 |
| H | -3.99182 | 4.14447  | 0.179604 |
| H | -0.5291  | -4.24582 | -1.33351 |
| H | 1.055941 | -2.32642 | -2.63698 |
| C | -0.06697 | -0.84902 | 1.712743 |
| C | 1.20252  | -1.35926 | 2.015931 |
| C | -1.08105 | -1.07977 | 2.659336 |
| N | 2.300608 | -1.18413 | 1.099742 |
| C | 1.45747  | -2.05273 | 3.199332 |
| C | -0.83491 | -1.76155 | 3.849859 |
| H | -2.08221 | -0.71003 | 2.463394 |
| C | 2.519138 | -1.97827 | 0.005866 |

|   |          |          |          |
|---|----------|----------|----------|
| C | 3.262182 | -0.19032 | 1.242925 |
| C | 0.440125 | -2.25374 | 4.127062 |
| H | 2.456343 | -2.43625 | 3.377663 |
| H | -1.64231 | -1.91114 | 4.559668 |
| N | 3.657531 | -1.43962 | -0.51812 |
| C | 4.128153 | -0.35274 | 0.215756 |
| H | 3.21398  | 0.552433 | 2.02037  |
| H | 0.638453 | -2.79179 | 5.04694  |
| C | 4.320655 | -1.96477 | -1.69817 |
| H | 5.006703 | 0.20692  | -0.0579  |
| H | 4.411293 | -1.18808 | -2.4615  |
| H | 3.716663 | -2.78401 | -2.08432 |
| H | 5.316207 | -2.34252 | -1.44895 |

Irpmb

|    |          |          |          |
|----|----------|----------|----------|
| C  | 2.226847 | -3.61714 | 1.485956 |
| C  | 1.079816 | -2.95381 | 1.042215 |
| C  | 1.001188 | -1.55814 | 1.008528 |
| C  | 2.156328 | -0.85906 | 1.413428 |
| C  | 3.30784  | -1.49263 | 1.868204 |
| C  | 3.335432 | -2.88712 | 1.906586 |
| H  | 2.254641 | -4.7019  | 1.502596 |
| H  | 0.223178 | -3.53455 | 0.715202 |
| H  | 4.2286   | -3.39328 | 2.254429 |
| C  | 2.857264 | 1.626972 | 1.536845 |
| C  | 2.089209 | 2.789268 | 1.306477 |
| C  | 0.757447 | 1.006737 | 0.9034   |
| N  | 0.819693 | 2.373259 | 0.941456 |
| N  | 2.002704 | 0.554762 | 1.310532 |
| Ir | -0.61044 | -0.38654 | 0.406225 |
| C  | -1.99563 | -1.13316 | 1.734144 |
| C  | -3.30266 | -0.59021 | 1.628768 |
| C  | -1.76301 | -2.02948 | 2.787599 |
| C  | -4.31191 | -0.90825 | 2.530273 |
| C  | -2.77278 | -2.37273 | 3.686447 |
| H  | -0.77539 | -2.45615 | 2.906428 |
| C  | -4.0421  | -1.8112  | 3.561171 |
| H  | -2.56565 | -3.07044 | 4.490831 |
| H  | -4.82608 | -2.06422 | 4.265781 |
| C  | -4.58647 | 0.885644 | -0.06474 |

|   |          |          |          |
|---|----------|----------|----------|
| C | -4.08982 | 1.575214 | -1.18817 |
| N | -2.71149 | 1.381768 | -1.21044 |
| N | -3.4657  | 0.312006 | 0.542777 |
| C | -2.32024 | 0.607203 | -0.16692 |
| C | -0.6073  | -1.33161 | -1.44984 |
| C | 0.429063 | -1.19512 | -2.38483 |
| C | -1.67607 | -2.17224 | -1.8063  |
| C | 0.409528 | -1.87317 | -3.60501 |
| C | -1.6974  | -2.86168 | -3.01705 |
| H | -2.49995 | -2.3024  | -1.11282 |
| C | -0.65046 | -2.71459 | -3.92614 |
| H | -2.53456 | -3.51173 | -3.24992 |
| H | -0.66157 | -3.24067 | -4.87376 |
| C | 2.837637 | -0.86416 | -1.81777 |
| C | 3.661064 | 0.256586 | -1.65259 |
| C | 1.551412 | 1.010469 | -2.15667 |
| N | 2.839137 | 1.362955 | -1.86583 |
| N | 1.569988 | -0.35933 | -2.11799 |
| C | 5.006839 | 0.128138 | -1.32137 |
| C | 3.325    | -2.15561 | -1.65515 |
| C | -5.95408 | 0.87593  | 0.202501 |
| C | -4.92187 | 2.272139 | -2.05539 |
| C | 4.209044 | 1.737307 | 1.862386 |
| C | 2.629771 | 4.066202 | 1.417785 |
| C | 5.50011  | -1.16659 | -1.16324 |
| H | 6.542206 | -1.31005 | -0.90137 |
| C | 4.671304 | -2.28786 | -1.32638 |
| H | 5.083142 | -3.27827 | -1.17392 |
| H | 2.672804 | -3.01285 | -1.75183 |
| H | 5.640891 | 0.99545  | -1.18449 |
| C | 3.977923 | 4.166105 | 1.757883 |
| H | 4.434363 | 5.144455 | 1.84904  |
| C | 4.752041 | 3.017953 | 1.969947 |
| H | 5.801282 | 3.122695 | 2.21962  |
| H | 4.833629 | 0.870344 | 2.00638  |
| H | 2.03143  | 4.948298 | 1.228134 |
| C | -6.28792 | 2.266456 | -1.77621 |
| H | -6.96879 | 2.797583 | -2.43052 |
| C | -6.79132 | 1.576377 | -0.66713 |
| H | -7.85821 | 1.57957  | -0.4777  |



|   |          |          |          |
|---|----------|----------|----------|
| H | -6.37256 | 0.341103 | 1.040996 |
| H | -4.52329 | 2.789797 | -2.91886 |
| C | 3.326534 | 2.730403 | -1.867   |
| H | 2.469972 | 3.393508 | -1.96774 |
| H | 3.847726 | 2.951796 | -0.93384 |
| H | 4.009513 | 2.893296 | -2.70628 |
| C | -0.24406 | 3.27018  | 0.534132 |
| H | -1.18842 | 2.737611 | 0.598229 |
| H | -0.27163 | 4.131977 | 1.203043 |
| H | -0.08595 | 3.605486 | -0.49412 |
| C | -1.84359 | 1.841068 | -2.28587 |
| H | -0.80487 | 1.606368 | -2.05353 |
| H | -2.1139  | 1.336896 | -3.2168  |
| H | -1.95711 | 2.920612 | -2.41506 |
| H | -5.29233 | -0.46034 | 2.461517 |
| H | 4.177368 | -0.93902 | 2.18824  |
| H | 1.233072 | -1.73026 | -4.29636 |

Ir-N

|    |          |          |          |
|----|----------|----------|----------|
| Ir | 0.724065 | 0.02185  | -0.03395 |
| C  | -2.75437 | -0.90671 | 1.914624 |
| N  | -3.57378 | -1.20948 | 0.868249 |
| N  | -1.65948 | -1.68228 | 1.667971 |
| C  | -3.01045 | -2.14272 | -0.00117 |
| C  | -4.76931 | -0.42965 | 0.613784 |
| C  | -0.44696 | -1.52548 | 2.42911  |
| C  | -1.79478 | -2.4468  | 0.512733 |
| H  | -3.5064  | -2.50396 | -0.88669 |
| C  | 0.608243 | -0.75907 | 1.913343 |
| C  | -0.39898 | -2.09217 | 3.702036 |
| H  | -1.0235  | -3.11088 | 0.165058 |
| C  | 1.719879 | -0.57582 | 2.754772 |
| C  | 0.718032 | -1.90551 | 4.509458 |
| H  | -1.25157 | -2.66404 | 4.050283 |
| C  | 1.778011 | -1.13829 | 4.029588 |
| H  | 2.558336 | 0.017759 | 2.406744 |
| H  | 0.755784 | -2.34524 | 5.499536 |
| H  | 2.65473  | -0.97236 | 4.647687 |
| C  | 0.235388 | 1.964095 | 0.505748 |
| N  | -0.80998 | 2.695326 | 0.980943 |

|   |          |          |          |
|---|----------|----------|----------|
| N | 1.226936 | 2.887973 | 0.290345 |
| C | -0.47411 | 4.046224 | 1.045519 |
| C | -2.05108 | 2.139867 | 1.523033 |
| C | 2.47746  | 2.399309 | -0.17409 |
| C | 0.804513 | 4.168377 | 0.611219 |
| H | -1.16044 | 4.78946  | 1.413725 |
| H | -2.22627 | 2.632566 | 2.484174 |
| H | -1.89698 | 1.082901 | 1.731295 |
| C | 2.51348  | 0.998173 | -0.37018 |
| C | 3.568251 | 3.225314 | -0.41045 |
| H | 1.431665 | 5.037283 | 0.521599 |
| C | 3.726352 | 0.460932 | -0.82545 |
| C | 4.759786 | 2.650794 | -0.85842 |
| H | 3.508934 | 4.296567 | -0.25164 |
| C | 4.836657 | 1.272594 | -1.06294 |
| H | 3.797106 | -0.60659 | -0.99589 |
| H | 5.621447 | 3.281516 | -1.04493 |
| H | 5.764189 | 0.830635 | -1.41141 |
| C | -0.45863 | -0.24791 | -1.65426 |
| N | -1.31642 | 0.477915 | -2.43793 |
| N | -0.31596 | -1.44484 | -2.32257 |
| C | -1.71367 | -0.26652 | -3.53824 |
| C | -1.67819 | 1.873072 | -2.23085 |
| C | 0.62431  | -2.37196 | -1.80128 |
| C | -1.08667 | -1.47036 | -3.46509 |
| H | -2.38351 | 0.124196 | -4.28542 |
| H | -1.51931 | 2.412503 | -3.17064 |
| H | -0.99092 | 2.27794  | -1.49517 |
| C | 1.304629 | -1.88309 | -0.66744 |
| C | 0.826211 | -3.63374 | -2.3508  |
| H | -1.11747 | -2.31148 | -4.13465 |
| C | 2.230164 | -2.76632 | -0.09637 |
| C | 1.765186 | -4.47488 | -1.75364 |
| H | 0.271424 | -3.96804 | -3.22116 |
| C | 2.463902 | -4.03762 | -0.62719 |
| H | 2.767967 | -2.45927 | 0.794346 |
| H | 1.943016 | -5.4626  | -2.16313 |
| H | 3.187793 | -4.69439 | -0.15577 |
| C | -4.61487 | 0.565645 | -0.54765 |
| H | -4.54783 | -0.01166 | -1.47306 |

|   |          |          |          |
|---|----------|----------|----------|
| H | -5.55368 | 1.150214 | -0.60039 |
| C | -3.31368 | 2.308257 | 0.661164 |
| H | -3.40751 | 3.359252 | 0.347525 |
| C | -3.13    | 2.046669 | -1.78097 |
| H | -3.78002 | 1.618481 | -2.54964 |
| H | -4.15215 | 2.1189   | 1.33699  |
| H | -3.3486  | 3.12665  | -1.76563 |
| H | -4.998   | 0.079082 | 1.549894 |
| H | -5.61298 | -1.08827 | 0.380386 |
| N | -3.42656 | 1.419977 | -0.49952 |

Ir-C

|    |          |          |          |
|----|----------|----------|----------|
| Ir | 0.709712 | 0.066264 | -0.13437 |
| C  | -0.77265 | -0.39733 | -1.43208 |
| N  | -1.85099 | 0.199158 | -2.03465 |
| N  | -0.71551 | -1.65275 | -2.00026 |
| C  | -2.42368 | -0.66225 | -2.95989 |
| C  | -2.17423 | 1.619693 | -1.94439 |
| C  | 0.325332 | -2.51416 | -1.57087 |
| C  | -1.71959 | -1.82379 | -2.92825 |
| H  | -3.26601 | -0.3783  | -3.56704 |
| H  | -1.96045 | 2.056393 | -2.92573 |
| H  | -1.46717 | 2.055682 | -1.24853 |
| C  | 1.190956 | -1.90131 | -0.64444 |
| C  | 0.444379 | -3.83166 | -1.99951 |
| H  | -1.85292 | -2.73188 | -3.4888  |
| C  | 2.211851 | -2.71976 | -0.14379 |
| C  | 1.483763 | -4.60553 | -1.48354 |
| H  | -0.25347 | -4.26117 | -2.71054 |
| C  | 2.363057 | -4.04682 | -0.55393 |
| H  | 2.893793 | -2.3147  | 0.596675 |
| H  | 1.599505 | -5.63554 | -1.80102 |
| H  | 3.165073 | -4.65111 | -0.14241 |
| C  | -2.27737 | -0.71864 | 1.511682 |
| N  | -3.14548 | -1.30248 | 0.651222 |
| N  | -1.34343 | -1.69049 | 1.716529 |
| C  | -2.77577 | -2.60993 | 0.332775 |
| C  | -4.3269  | -0.63558 | 0.096528 |
| C  | -0.1307  | -1.41397 | 2.439451 |
| C  | -1.62527 | -2.85243 | 1.007814 |

|   |          |          |          |
|---|----------|----------|----------|
| H | -3.33747 | -3.23243 | -0.34347 |
| H | -5.19305 | -1.25856 | 0.340915 |
| H | -4.23798 | -0.63753 | -0.99225 |
| C | 0.822489 | -0.56513 | 1.859053 |
| C | 0.040891 | -1.9698  | 3.704397 |
| H | -0.97425 | -3.70952 | 1.012169 |
| C | 1.954267 | -0.26321 | 2.632175 |
| C | 1.187235 | -1.67904 | 4.440237 |
| H | -0.73164 | -2.61558 | 4.108179 |
| C | 2.138442 | -0.81461 | 3.900982 |
| H | 2.715397 | 0.394674 | 2.227014 |
| H | 1.326713 | -2.10919 | 5.425413 |
| H | 3.031104 | -0.56816 | 4.467267 |
| C | 0.359883 | 2.064021 | 0.309086 |
| N | -0.60405 | 2.87509  | 0.822824 |
| N | 1.397396 | 2.910803 | 0.012423 |
| C | -0.16916 | 4.198397 | 0.845475 |
| C | -1.85729 | 2.412837 | 1.430857 |
| C | 2.572808 | 2.330493 | -0.53193 |
| C | 1.086231 | 4.222562 | 0.334031 |
| H | -0.78026 | 4.995432 | 1.232692 |
| H | -1.81572 | 2.712037 | 2.481434 |
| H | -1.85214 | 1.317985 | 1.427613 |
| C | 2.501552 | 0.926019 | -0.69782 |
| C | 3.694308 | 3.077487 | -0.86776 |
| H | 1.764759 | 5.043514 | 0.185799 |
| C | 3.634248 | 0.305295 | -1.24538 |
| C | 4.804932 | 2.419521 | -1.40006 |
| H | 3.717985 | 4.152158 | -0.72383 |
| C | 4.771836 | 1.037283 | -1.58808 |
| H | 3.621936 | -0.7658  | -1.40381 |
| H | 5.688248 | 2.988543 | -1.66669 |
| H | 5.634494 | 0.529302 | -2.00624 |
| C | -3.62043 | 1.968724 | -1.56736 |
| H | -3.78284 | 2.966219 | -1.99102 |
| H | -4.31262 | 1.316267 | -2.11124 |
| C | -4.06097 | 2.071896 | -0.08576 |
| C | -4.59288 | 0.780302 | 0.637743 |
| H | -4.28063 | 0.797954 | 1.682861 |
| C | -3.14984 | 2.975699 | 0.79416  |

|   |          |          |          |
|---|----------|----------|----------|
| H | -2.91379 | 3.880801 | 0.220761 |
| H | -5.683   | 0.871583 | 0.645993 |
| H | -3.78236 | 3.315519 | 1.620311 |
| H | -4.96506 | 2.685903 | -0.1725  |

Ir-Ph

|    |          |          |          |
|----|----------|----------|----------|
| Ir | 1.281856 | 0.050537 | -0.14449 |
| C  | 0.306342 | -1.31066 | -1.37987 |
| N  | -0.78615 | -1.36306 | -2.18527 |
| N  | 1.017171 | -2.44236 | -1.68635 |
| C  | -0.75242 | -2.50006 | -2.98366 |
| C  | -1.69833 | -0.21357 | -2.30458 |
| C  | 2.325358 | -2.53988 | -1.14213 |
| C  | 0.377228 | -3.18441 | -2.66934 |
| H  | -1.52308 | -2.72805 | -3.69772 |
| H  | -1.15015 | 0.585101 | -2.80129 |
| H  | -1.89434 | 0.128954 | -1.29175 |
| C  | 2.74248  | -1.3891  | -0.43021 |
| C  | 3.131075 | -3.65892 | -1.30607 |
| H  | 0.767412 | -4.10689 | -3.06084 |
| C  | 4.039525 | -1.41445 | 0.101666 |
| C  | 4.417847 | -3.64449 | -0.76257 |
| H  | 2.777162 | -4.5311  | -1.84517 |
| C  | 4.87008  | -2.52417 | -0.064   |
| H  | 4.397894 | -0.55074 | 0.649791 |
| H  | 5.061488 | -4.50778 | -0.8878  |
| H  | 5.872129 | -2.51683 | 0.351782 |
| C  | 0.74011  | -0.40655 | 1.775716 |
| N  | 0.144501 | -1.4514  | 2.429822 |
| N  | 1.408557 | 0.279289 | 2.765457 |
| C  | 0.457633 | -1.41971 | 3.779132 |
| C  | -0.61005 | -2.50707 | 1.751748 |
| C  | 2.269721 | 1.333146 | 2.363353 |
| C  | 1.24387  | -0.331   | 3.990137 |
| H  | 0.107952 | -2.15977 | 4.476412 |
| H  | 0.095639 | -3.23421 | 1.337677 |
| H  | -1.10596 | -2.02441 | 0.910957 |
| C  | 2.410115 | 1.419915 | 0.964464 |
| C  | 2.902094 | 2.177579 | 3.271038 |
| H  | 1.699091 | 0.032822 | 4.893992 |

|   |          |          |          |
|---|----------|----------|----------|
| C | 3.265559 | 2.435723 | 0.512773 |
| C | 3.746672 | 3.16941  | 2.775047 |
| H | 2.746117 | 2.076949 | 4.33998  |
| C | 3.927139 | 3.292009 | 1.39593  |
| H | 3.413424 | 2.565068 | -0.55349 |
| H | 4.253313 | 3.840401 | 3.459185 |
| H | 4.582656 | 4.064479 | 1.006938 |
| C | -2.32459 | 2.643291 | -0.97428 |
| N | -2.93972 | 2.87305  | 0.222142 |
| N | -0.99724 | 2.664895 | -0.63763 |
| C | -2.02736 | 3.059772 | 1.262093 |
| C | -4.38979 | 3.033803 | 0.286302 |
| C | 0.042363 | 2.562029 | -1.62735 |
| C | -0.79442 | 2.911347 | 0.71791  |
| H | -2.31786 | 3.28056  | 2.275336 |
| C | 1.01295  | 1.552663 | -1.58478 |
| C | -0.00417 | 3.493774 | -2.66959 |
| H | 0.187885 | 2.959509 | 1.155637 |
| C | 1.937855 | 1.528413 | -2.64655 |
| C | 0.9168   | 3.440163 | -3.70821 |
| H | -0.78384 | 4.245723 | -2.65495 |
| C | 1.894685 | 2.446903 | -3.69343 |
| H | 2.708963 | 0.76439  | -2.65809 |
| H | 0.872678 | 4.164144 | -4.51385 |
| H | 2.62462  | 2.383723 | -4.49411 |
| C | -3.00739 | -0.43338 | -3.05199 |
| C | -1.63006 | -3.19168 | 2.673582 |
| C | -5.1376  | 2.277799 | 1.410252 |
| C | -3.90902 | -1.39476 | 1.829013 |
| C | -3.52548 | -2.55118 | 1.156153 |
| C | -3.60086 | -2.56209 | -0.23696 |
| C | -4.04058 | -1.44656 | -0.94641 |
| C | -4.39875 | -0.28797 | -0.24274 |
| C | -4.31813 | -0.24114 | 1.14883  |
| H | -3.83352 | -1.35612 | 2.912163 |
| H | -3.26617 | -3.44019 | -0.78112 |
| H | -4.67974 | 0.594861 | -0.80169 |
| C | -4.52383 | 0.999935 | 1.997057 |
| C | -2.87185 | -3.69182 | 1.907157 |
| C | -3.9936  | -1.46423 | -2.45659 |

|   |          |          |          |
|---|----------|----------|----------|
| H | -3.72757 | -2.47374 | -2.78165 |
| H | -4.98771 | -1.26378 | -2.87078 |
| H | -2.81856 | -0.67701 | -4.10327 |
| H | -3.47019 | 0.557567 | -3.04921 |
| H | -2.59042 | -4.48228 | 1.204599 |
| H | -3.56797 | -4.14056 | 2.623586 |
| H | -1.16533 | -4.02042 | 3.216762 |
| H | -1.96643 | -2.47321 | 3.424402 |
| H | -3.54508 | 1.247278 | 2.421256 |
| H | -5.14527 | 0.717237 | 2.85461  |
| H | -6.14585 | 2.066223 | 1.038075 |
| H | -5.2723  | 2.960274 | 2.255845 |
| H | -4.73773 | 2.72385  | -0.69741 |
| H | -4.62153 | 4.100665 | 0.375195 |

Ir-N-CN

|    |          |          |          |
|----|----------|----------|----------|
| Ir | 0.371644 | -0.56939 | -0.03521 |
| C  | -1.40588 | 1.65718  | 2.306058 |
| N  | -2.28026 | 2.434747 | 1.602655 |
| N  | -1.92144 | 0.412579 | 2.185068 |
| C  | -3.32601 | 1.705577 | 1.068742 |
| C  | -2.04971 | 3.865591 | 1.459555 |
| C  | -1.18214 | -0.73229 | 2.660791 |
| C  | -3.11472 | 0.410029 | 1.444922 |
| H  | -4.14088 | 2.135177 | 0.509817 |
| C  | -0.0626  | -1.15687 | 1.934482 |
| C  | -1.56664 | -1.32125 | 3.861738 |
| C  | 0.705508 | -2.18173 | 2.511053 |
| C  | -0.81022 | -2.36214 | 4.391491 |
| H  | -2.44687 | -0.95298 | 4.376671 |
| C  | 0.336555 | -2.77798 | 3.717359 |
| H  | 1.591707 | -2.53728 | 1.997492 |
| H  | -1.10404 | -2.8295  | 5.323872 |
| H  | 0.947729 | -3.57564 | 4.126957 |
| C  | 2.069412 | 0.532042 | 0.415021 |
| N  | 2.430204 | 1.699207 | 1.036792 |
| N  | 3.243108 | 0.023233 | -0.08091 |
| C  | 3.782088 | 1.919898 | 0.917574 |
| C  | 1.544597 | 2.525022 | 1.864791 |
| C  | 3.162604 | -1.23268 | -0.75861 |

|   |          |          |          |
|---|----------|----------|----------|
| C | 4.312745 | 0.875415 | 0.214606 |
| H | 4.278431 | 2.773139 | 1.347835 |
| H | 2.094781 | 2.765534 | 2.779362 |
| H | 0.674524 | 1.9249   | 2.138349 |
| C | 1.848599 | -1.75652 | -0.82875 |
| C | 4.263147 | -1.88631 | -1.29861 |
| C | 1.693434 | -2.98803 | -1.48276 |
| C | 4.065227 | -3.11272 | -1.93648 |
| H | 5.260173 | -1.47283 | -1.23531 |
| C | 2.786247 | -3.66061 | -2.02772 |
| H | 0.70353  | -3.41836 | -1.56342 |
| H | 4.916587 | -3.63289 | -2.35956 |
| H | 2.640327 | -4.61274 | -2.52627 |
| C | -0.57921 | 0.624231 | -1.35708 |
| N | -0.29183 | 1.763066 | -2.08226 |
| N | -1.75335 | 0.148387 | -1.90688 |
| C | -1.26756 | 2.008729 | -3.00878 |
| C | 0.926469 | 2.554968 | -1.96384 |
| C | -2.16532 | -1.15628 | -1.501   |
| C | -2.19611 | 1.006706 | -2.91092 |
| H | -1.24597 | 2.851147 | -3.67958 |
| H | 1.302033 | 2.760784 | -2.97067 |
| H | 1.659496 | 1.938314 | -1.45395 |
| C | -1.26671 | -1.73926 | -0.58642 |
| C | -3.30954 | -1.78968 | -1.97857 |
| C | -1.59241 | -3.03159 | -0.15621 |
| C | -3.58234 | -3.07971 | -1.53278 |
| H | -3.98532 | -1.30709 | -2.67119 |
| C | -2.72466 | -3.69754 | -0.62375 |
| H | -0.95073 | -3.52293 | 0.566873 |
| H | -4.47391 | -3.58741 | -1.87988 |
| H | -2.95119 | -4.69509 | -0.2634  |
| C | -1.21293 | 4.272925 | 0.239921 |
| H | -1.77365 | 3.995684 | -0.65695 |
| H | -1.16174 | 5.378672 | 0.256903 |
| C | 1.049054 | 3.833191 | 1.22917  |
| H | 1.905607 | 4.449976 | 0.919513 |
| C | 0.691311 | 3.864326 | -1.20941 |
| H | 0.034497 | 4.503517 | -1.81022 |
| H | 0.562395 | 4.383204 | 2.039956 |



|   |          |          |          |
|---|----------|----------|----------|
| H | 1.652396 | 4.392305 | -1.14991 |
| H | -1.57843 | 4.192942 | 2.385963 |
| H | -3.01323 | 4.377567 | 1.386893 |
| N | 0.114486 | 3.666207 | 0.115078 |
| C | 5.66707  | 0.699866 | -0.13832 |
| N | 6.785477 | 0.596023 | -0.41389 |
| C | -3.37556 | 0.88887  | -3.67542 |
| N | -4.33565 | 0.84519  | -4.31907 |
| C | -3.96209 | -0.70824 | 1.29069  |
| N | -4.69432 | -1.5992  | 1.214823 |

Ir-N-F

|    |          |          |          |
|----|----------|----------|----------|
| Ir | 0.522088 | -0.47102 | 0.001177 |
| C  | -2.18388 | 1.394031 | 2.157283 |
| N  | -3.13505 | 1.770622 | 1.265112 |
| N  | -2.15144 | 0.030905 | 2.021256 |
| C  | -3.70245 | 0.69221  | 0.578516 |
| C  | -3.38266 | 3.175057 | 0.997094 |
| C  | -1.12462 | -0.76374 | 2.652304 |
| C  | -3.07174 | -0.3929  | 1.084695 |
| H  | -4.49535 | 0.77034  | -0.14435 |
| C  | 0.10541  | -0.94393 | 2.005276 |
| C  | -1.37771 | -1.25558 | 3.930788 |
| C  | 1.097102 | -1.62528 | 2.733243 |
| C  | -0.38557 | -1.94536 | 4.619281 |
| H  | -2.34824 | -1.07688 | 4.379866 |
| C  | 0.858471 | -2.11945 | 4.015145 |
| H  | 2.070667 | -1.78572 | 2.283259 |
| H  | -0.57756 | -2.33001 | 5.614165 |
| H  | 1.649899 | -2.64386 | 4.54117  |
| C  | 1.676106 | 1.21429  | 0.385746 |
| N  | 1.565973 | 2.485659 | 0.847879 |
| N  | 3.001853 | 1.094287 | 0.004793 |
| C  | 2.782015 | 3.169656 | 0.751665 |
| C  | 0.391012 | 3.046275 | 1.515881 |
| C  | 3.429279 | -0.17098 | -0.49711 |
| C  | 3.656606 | 2.283992 | 0.226975 |
| H  | 2.922946 | 4.183128 | 1.081183 |
| H  | 0.747958 | 3.542254 | 2.423883 |
| H  | -0.25864 | 2.227057 | 1.827451 |

|   |          |          |          |
|---|----------|----------|----------|
| C | 2.394439 | -1.13426 | -0.55934 |
| C | 4.738118 | -0.43634 | -0.88278 |
| C | 2.748524 | -2.40205 | -1.0442  |
| C | 5.047664 | -1.71448 | -1.35273 |
| H | 5.506734 | 0.321905 | -0.82147 |
| C | 4.056541 | -2.69231 | -1.43208 |
| H | 1.986007 | -3.16732 | -1.11746 |
| H | 6.064266 | -1.93825 | -1.65505 |
| H | 4.303079 | -3.68279 | -1.79962 |
| C | -0.6613  | 0.180168 | -1.50318 |
| N | -0.76971 | 1.272681 | -2.31857 |
| N | -1.52313 | -0.75942 | -2.05763 |
| C | -1.69523 | 1.049494 | -3.33409 |
| C | 0.044185 | 2.476529 | -2.24057 |
| C | -1.47888 | -2.08156 | -1.5218  |
| C | -2.14293 | -0.21574 | -3.14863 |
| H | -1.93944 | 1.773156 | -4.09092 |
| H | 0.430122 | 2.69519  | -3.24182 |
| H | 0.890367 | 2.252215 | -1.59919 |
| C | -0.52726 | -2.20767 | -0.4929  |
| C | -2.29437 | -3.11716 | -1.96838 |
| C | -0.4348  | -3.47879 | 0.087226 |
| C | -2.15764 | -4.36662 | -1.36617 |
| H | -3.01844 | -2.96546 | -2.75749 |
| C | -1.22906 | -4.5439  | -0.34031 |
| H | 0.264266 | -3.63539 | 0.901706 |
| H | -2.77919 | -5.1916  | -1.69477 |
| H | -1.13019 | -5.51479 | 0.134325 |
| C | -2.70192 | 3.706313 | -0.27203 |
| H | -3.15575 | 3.203747 | -1.13012 |
| H | -2.96734 | 4.778673 | -0.34956 |
| C | -0.43175 | 4.056709 | 0.70043  |
| H | 0.233248 | 4.831188 | 0.290297 |
| C | -0.74173 | 3.678171 | -1.71387 |
| H | -1.57364 | 3.873101 | -2.39769 |
| H | -1.07409 | 4.567195 | 1.42407  |
| H | -0.08691 | 4.560971 | -1.77342 |
| H | -3.04197 | 3.709675 | 1.88373  |
| H | -4.45891 | 3.35149  | 0.899939 |
| N | -1.25811 | 3.484351 | -0.36521 |

|   |          |          |          |
|---|----------|----------|----------|
| F | -3.03018 | -0.89445 | -3.86665 |
| F | -3.28046 | -1.67949 | 0.850194 |
| F | 4.946494 | 2.442494 | -0.05182 |

Ir-N-Ph

|    |          |          |          |
|----|----------|----------|----------|
| Ir | 0.643033 | -0.61838 | -0.12693 |
| C  | -0.93029 | 0.968379 | 2.813241 |
| N  | -1.80509 | 1.982747 | 2.589443 |
| N  | -1.60735 | -0.1337  | 2.398747 |
| C  | -3.01164 | 1.528828 | 2.078609 |
| C  | -1.45696 | 3.358713 | 2.902999 |
| C  | -0.93607 | -1.41027 | 2.477704 |
| C  | -2.91878 | 0.168472 | 1.978306 |
| H  | -3.83062 | 2.183714 | 1.832466 |
| C  | 0.133105 | -1.69418 | 1.612367 |
| C  | -1.33147 | -2.28902 | 3.485248 |
| C  | 0.812392 | -2.90412 | 1.842223 |
| C  | -0.66116 | -3.49328 | 3.667542 |
| H  | -2.16471 | -2.0155  | 4.123264 |
| C  | 0.425685 | -3.79068 | 2.846544 |
| H  | 1.6507   | -3.16935 | 1.20641  |
| H  | -0.97185 | -4.17896 | 4.447419 |
| H  | 0.97347  | -4.71787 | 2.982272 |
| C  | 2.382756 | 0.344104 | 0.519322 |
| N  | 2.794371 | 1.299176 | 1.399331 |
| N  | 3.532091 | -0.01919 | -0.154   |
| C  | 4.158467 | 1.521184 | 1.278825 |
| C  | 1.994595 | 1.906148 | 2.462908 |
| C  | 3.376253 | -0.94524 | -1.23216 |
| C  | 4.643266 | 0.690657 | 0.319102 |
| H  | 4.692742 | 2.187058 | 1.935005 |
| H  | 2.598947 | 1.868537 | 3.375358 |
| H  | 1.098778 | 1.299054 | 2.622768 |
| C  | 2.066816 | -1.47156 | -1.36293 |
| C  | 4.395747 | -1.25508 | -2.12753 |
| C  | 1.856737 | -2.375   | -2.41731 |
| C  | 4.14351  | -2.15911 | -3.16044 |
| H  | 5.372459 | -0.80263 | -2.04687 |
| C  | 2.878518 | -2.72682 | -3.29762 |
| H  | 0.870242 | -2.79453 | -2.5625  |

|   |          |          |          |
|---|----------|----------|----------|
| H | 4.937146 | -2.40553 | -3.85677 |
| H | 2.681231 | -3.42764 | -4.10219 |
| C | -0.46162 | 0.868426 | -0.91986 |
| N | -0.29277 | 2.188456 | -1.23024 |
| N | -1.71715 | 0.548921 | -1.40425 |
| C | -1.43899 | 2.694156 | -1.81543 |
| C | 0.953553 | 2.928299 | -1.09095 |
| C | -1.98226 | -0.85203 | -1.5326  |
| C | -2.35166 | 1.683028 | -1.91058 |
| H | -1.55007 | 3.735458 | -2.06612 |
| H | 1.219544 | 3.348469 | -2.06707 |
| H | 1.717173 | 2.207469 | -0.81445 |
| C | -0.96934 | -1.64569 | -0.95816 |
| C | -3.06177 | -1.38327 | -2.23424 |
| C | -1.14642 | -3.03178 | -1.05688 |
| C | -3.17977 | -2.76794 | -2.33491 |
| H | -3.79909 | -0.75044 | -2.70497 |
| C | -2.23012 | -3.59269 | -1.73397 |
| H | -0.41309 | -3.6864  | -0.59807 |
| H | -4.01763 | -3.19334 | -2.87525 |
| H | -2.32888 | -4.67163 | -1.7996  |
| C | -0.7687  | 4.127137 | 1.76836  |
| H | -1.46604 | 4.17482  | 0.928078 |
| H | -0.62512 | 5.164586 | 2.130789 |
| C | 1.56512  | 3.363216 | 2.222389 |
| H | 2.435372 | 3.963025 | 1.917513 |
| C | 0.856972 | 4.039636 | -0.04557 |
| H | 0.132049 | 4.787079 | -0.38574 |
| H | 1.261595 | 3.754678 | 3.199323 |
| H | 1.827894 | 4.554941 | -0.01224 |
| H | -0.82211 | 3.325223 | 3.788997 |
| H | -2.36571 | 3.903535 | 3.175312 |
| N | 0.471792 | 3.544203 | 1.266496 |
| C | 6.060318 | 0.480052 | -0.02344 |
| C | 6.666515 | -0.76757 | 0.183077 |
| C | 6.837304 | 1.543254 | -0.49624 |
| C | 8.018358 | -0.94616 | -0.08842 |
| H | 6.068919 | -1.59432 | 0.549002 |
| C | 8.194685 | 1.364064 | -0.76097 |
| H | 6.369161 | 2.505858 | -0.66738 |

|   |          |          |          |
|---|----------|----------|----------|
| C | 8.787226 | 0.119312 | -0.56124 |
| H | 8.47499  | -1.91598 | 0.073414 |
| H | 8.785011 | 2.194783 | -1.13094 |
| H | 9.840968 | -0.02241 | -0.77267 |
| C | -3.98693 | -0.77303 | 1.625166 |
| C | -3.73784 | -2.04508 | 1.094572 |
| C | -5.3272  | -0.38077 | 1.81012  |
| C | -4.79008 | -2.88747 | 0.747443 |
| H | -2.72385 | -2.37104 | 0.9263   |
| C | -6.37521 | -1.21812 | 1.446198 |
| H | -5.54711 | 0.581245 | 2.258382 |
| C | -6.11134 | -2.48045 | 0.912177 |
| H | -4.56441 | -3.8586  | 0.324083 |
| H | -7.39889 | -0.89281 | 1.59774  |
| H | -6.92719 | -3.13825 | 0.634176 |
| C | -3.77055 | 1.800527 | -2.26768 |
| C | -4.16794 | 2.53642  | -3.39102 |
| C | -4.75239 | 1.237785 | -1.4385  |
| C | -5.52106 | 2.711374 | -3.67553 |
| H | -3.41383 | 2.953727 | -4.04895 |
| C | -6.10056 | 1.405482 | -1.73103 |
| H | -4.45468 | 0.659475 | -0.57399 |
| C | -6.49074 | 2.145769 | -2.84865 |
| H | -5.81684 | 3.27824  | -4.5512  |
| H | -6.84328 | 0.95413  | -1.08292 |
| H | -7.54266 | 2.274667 | -3.07716 |

HB-Ir

|   |          |          |          |
|---|----------|----------|----------|
| C | 2.622187 | -2.44652 | 2.424516 |
| C | 1.352219 | -2.16683 | 1.906456 |
| C | 1.042485 | -0.89709 | 1.417177 |
| C | 2.105809 | 0.020499 | 1.506046 |
| C | 3.577296 | -1.44097 | 2.447258 |
| H | 2.874855 | -3.43701 | 2.782471 |
| H | 0.608    | -2.95566 | 1.860536 |
| H | 4.579725 | -1.61289 | 2.821042 |
| C | 2.546203 | 2.4781   | 0.869504 |
| C | 1.685497 | 3.405883 | 0.257928 |
| C | 0.549062 | 1.448253 | 0.42506  |
| N | 0.480483 | 2.747206 | 0.018422 |

|    |          |          |          |
|----|----------|----------|----------|
| N  | 1.803128 | 1.294904 | 0.977509 |
| Ir | -0.65138 | -0.19201 | 0.433325 |
| C  | -2.0441  | -0.59315 | 1.892519 |
| C  | -3.37752 | -0.24617 | 1.55457  |
| C  | -1.88645 | -1.11346 | 3.179999 |
| C  | -2.99222 | -1.26795 | 4.021995 |
| H  | -0.89832 | -1.39835 | 3.522227 |
| C  | -4.24773 | -0.89396 | 3.561754 |
| H  | -2.88315 | -1.672   | 5.021427 |
| H  | -5.13355 | -0.99744 | 4.178263 |
| C  | -4.67887 | 0.59799  | -0.51624 |
| C  | -4.17846 | 0.919731 | -1.78811 |
| N  | -2.78617 | 0.77679  | -1.72525 |
| N  | -3.54391 | 0.276029 | 0.25494  |
| C  | -2.3939  | 0.396227 | -0.49063 |
| C  | -0.50086 | -1.82855 | -0.84668 |
| C  | 0.69156  | -2.22136 | -1.48594 |
| C  | -1.54671 | -2.75759 | -0.92387 |
| C  | -1.34768 | -4.01764 | -1.4885  |
| H  | -2.5114  | -2.51714 | -0.49001 |
| C  | -0.07937 | -4.33698 | -1.95288 |
| H  | -2.14797 | -4.74718 | -1.52912 |
| H  | 0.157348 | -5.32618 | -2.33004 |
| C  | 3.126309 | -1.50777 | -1.40078 |
| C  | 3.73903  | -0.26613 | -1.61052 |
| C  | 1.501681 | 0.002367 | -2.04451 |
| N  | 2.718162 | 0.599596 | -2.01868 |
| N  | 1.753776 | -1.2896  | -1.646   |
| C  | 5.093636 | -0.04383 | -1.38648 |
| C  | 3.889124 | -2.61957 | -1.01045 |
| C  | -6.05674 | 0.651898 | -0.24798 |
| C  | -4.99653 | 1.299367 | -2.84561 |
| C  | 3.875317 | 2.824568 | 1.182678 |
| C  | 2.075925 | 4.703315 | -0.05929 |
| C  | 5.83419  | -1.14046 | -0.95043 |
| H  | 6.892102 | -1.0214  | -0.74751 |
| C  | 5.249788 | -2.39901 | -0.77907 |
| H  | 5.84609  | -3.24786 | -0.4673  |
| H  | 5.541605 | 0.931181 | -1.52276 |
| C  | 3.390081 | 5.04339  | 0.258611 |

|   |          |          |          |
|---|----------|----------|----------|
| H | 3.750713 | 6.03944  | 0.029567 |
| C | 4.263144 | 4.132739 | 0.858221 |
| H | 5.282332 | 4.416356 | 1.089796 |
| H | 1.404457 | 5.402295 | -0.53912 |
| C | -6.36431 | 1.348909 | -2.57601 |
| H | -7.05037 | 1.638336 | -3.36342 |
| C | -6.87899 | 1.035843 | -1.31648 |
| H | -7.94448 | 1.082028 | -1.12842 |
| H | -4.59374 | 1.539982 | -3.82021 |
| C | 2.963847 | 1.958009 | -2.47504 |
| H | 2.001827 | 2.437612 | -2.64009 |
| H | 3.520761 | 2.519772 | -1.72365 |
| H | 3.531345 | 1.947452 | -3.40973 |
| C | -0.65755 | 3.376628 | -0.62281 |
| H | -1.53277 | 2.753503 | -0.47025 |
| H | -0.83226 | 4.356435 | -0.17472 |
| H | -0.47668 | 3.497579 | -1.69418 |
| C | -1.89118 | 0.943104 | -2.86277 |
| H | -0.86819 | 0.727226 | -2.54899 |
| H | -2.17741 | 0.246632 | -3.65404 |
| H | -1.96326 | 1.96429  | -3.2459  |
| O | -6.6192  | 0.368947 | 0.938213 |
| H | -5.9134  | 0.080513 | 1.581058 |
| N | -4.44202 | -0.38285 | 2.332256 |
| O | 4.771566 | 2.001402 | 1.738481 |
| H | 4.351443 | 1.09951  | 1.88982  |
| O | 3.387512 | -3.86406 | -0.84326 |
| H | 2.528735 | -3.91627 | -1.32234 |
| N | 3.320252 | -0.20396 | 1.989703 |
| N | 0.919321 | -3.44488 | -1.96677 |

HB-Ir-  
CN

|   |          |          |          |
|---|----------|----------|----------|
| C | 2.623145 | -2.94978 | 2.056135 |
| C | 1.327046 | -2.59334 | 1.667466 |
| C | 1.016414 | -1.27266 | 1.337512 |
| C | 2.107963 | -0.39236 | 1.437533 |
| C | 3.606187 | -1.97156 | 2.107156 |
| H | 2.873714 | -3.97615 | 2.293845 |
| H | 0.560122 | -3.35811 | 1.597951 |
| H | 4.628069 | -2.20001 | 2.385442 |

|    |          |          |          |
|----|----------|----------|----------|
| C  | 2.564048 | 2.10774  | 1.026117 |
| C  | 1.682164 | 3.115243 | 0.595385 |
| C  | 0.508413 | 1.176458 | 0.64615  |
| N  | 0.442362 | 2.514251 | 0.393662 |
| N  | 1.80095  | 0.938813 | 1.070603 |
| Ir | -0.72696 | -0.43317 | 0.569015 |
| C  | -2.01713 | -0.96805 | 2.077494 |
| C  | -3.36459 | -0.58203 | 1.872993 |
| C  | -1.77482 | -1.61511 | 3.293057 |
| C  | -2.82022 | -1.8465  | 4.191553 |
| H  | -0.76917 | -1.93773 | 3.535683 |
| C  | -4.10136 | -1.42412 | 3.860571 |
| H  | -2.64584 | -2.34784 | 5.135887 |
| H  | -4.94312 | -1.58499 | 4.524237 |
| C  | -4.79199 | 0.483472 | 0.000374 |
| C  | -4.37682 | 0.946015 | -1.25969 |
| N  | -2.98666 | 0.794665 | -1.31198 |
| N  | -3.61443 | 0.074098 | 0.647155 |
| C  | -2.51533 | 0.274011 | -0.15871 |
| C  | -0.71591 | -1.93088 | -0.88057 |
| C  | 0.412324 | -2.26803 | -1.65016 |
| C  | -1.78354 | -2.83437 | -0.96982 |
| C  | -1.6551  | -4.02852 | -1.67826 |
| H  | -2.70626 | -2.63082 | -0.43735 |
| C  | -0.434   | -4.31204 | -2.27496 |
| H  | -2.47084 | -4.73958 | -1.73174 |
| H  | -0.24798 | -5.25768 | -2.77232 |
| C  | 2.857018 | -1.60386 | -1.65352 |
| C  | 3.487789 | -0.35883 | -1.77982 |
| C  | 1.238529 | -0.0089  | -2.05206 |
| N  | 2.469008 | 0.560919 | -2.04527 |
| N  | 1.483627 | -1.33907 | -1.79368 |
| C  | 4.851945 | -0.18015 | -1.60477 |
| C  | 3.61089  | -2.76574 | -1.41737 |
| C  | -6.1482  | 0.506455 | 0.371011 |
| C  | -5.25616 | 1.4425   | -2.2087  |
| C  | 3.927308 | 2.386616 | 1.254815 |
| C  | 2.078654 | 4.427377 | 0.382928 |
| C  | 5.590056 | -1.33356 | -1.30877 |
| C  | 4.983214 | -2.59971 | -1.2331  |



|        |          |          |          |
|--------|----------|----------|----------|
| H      | 5.579765 | -3.48068 | -1.03609 |
| H      | 5.324223 | 0.7897   | -1.66924 |
| C      | 3.433643 | 4.703304 | 0.614994 |
| C      | 4.331527 | 3.709704 | 1.037761 |
| H      | 5.373887 | 3.9492   | 1.201642 |
| H      | 1.39836  | 5.194111 | 0.04129  |
| C      | -6.60883 | 1.462392 | -1.83868 |
| C      | -7.04119 | 1.007798 | -0.58284 |
| H      | -8.09128 | 1.036379 | -0.32377 |
| H      | -4.92846 | 1.792956 | -3.17696 |
| C      | 2.723895 | 1.950322 | -2.39737 |
| H      | 1.76696  | 2.46167  | -2.46731 |
| H      | 3.336945 | 2.432061 | -1.63424 |
| H      | 3.238375 | 2.008333 | -3.35976 |
| C      | -0.73217 | 3.238492 | -0.05691 |
| H      | -1.6078  | 2.62074  | 0.114894 |
| H      | -0.82991 | 4.163409 | 0.513772 |
| H      | -0.65256 | 3.477249 | -1.12026 |
| C      | -2.17197 | 1.095032 | -2.48387 |
| H      | -1.13307 | 0.833552 | -2.27517 |
| H      | -2.52539 | 0.504591 | -3.33181 |
| H      | -2.25492 | 2.156361 | -2.73054 |
| O      | -6.62822 | 0.092131 | 1.549195 |
| H      | -5.88126 | -0.26085 | 2.111838 |
| N      | -4.37426 | -0.79199 | 2.704716 |
| O      | 4.838739 | 1.490655 | 1.633437 |
| H      | 4.404707 | 0.586923 | 1.738748 |
| O      | 3.090874 | -4.00702 | -1.35104 |
| H      | 2.207659 | -3.99788 | -1.78936 |
| N      | 3.349234 | -0.68948 | 1.797624 |
| N      | 0.578046 | -3.43538 | -2.27385 |
| C      | -7.57544 | 1.962133 | -2.76854 |
| N      | -8.34914 | 2.367176 | -3.52501 |
| C      | 6.999171 | -1.22662 | -1.08623 |
| N      | 8.137032 | -1.14156 | -0.90308 |
| C      | 3.915428 | 6.033695 | 0.400768 |
| N      | 4.293903 | 7.110489 | 0.220765 |
| Pt-Ref |          |          |          |
| C      | -1.52616 | -2.56979 | -0.01099 |

|    |          |          |          |
|----|----------|----------|----------|
| C  | -0.90495 | -3.80524 | -0.00679 |
| C  | -2.92445 | -2.53936 | 0.092756 |
| N  | -3.45113 | -1.211   | 0.034311 |
| C  | -1.64105 | -4.99612 | 0.111177 |
| C  | -3.69123 | -3.68493 | 0.211987 |
| C  | -3.02205 | -4.92245 | 0.223365 |
| H  | -1.12628 | -5.94986 | 0.111313 |
| H  | -4.77233 | -3.65353 | 0.288509 |
| H  | -3.59899 | -5.83509 | 0.315371 |
| Pt | -0.58572 | -0.73116 | -0.13387 |
| C  | 1.250664 | -1.58917 | -0.06617 |
| C  | 1.431506 | -3.00513 | -0.18952 |
| C  | 2.479427 | -0.88872 | -0.00294 |
| C  | 2.692766 | -3.61573 | -0.38273 |
| C  | 3.741959 | -1.46801 | -0.23563 |
| C  | 3.838822 | -2.85564 | -0.43494 |
| H  | 2.723738 | -4.69192 | -0.4962  |
| H  | 4.801339 | -3.32201 | -0.61093 |
| O  | 0.448832 | -3.95793 | -0.14347 |
| C  | 0.855336 | 3.501704 | 0.834266 |
| C  | 1.734663 | 1.396791 | 0.76177  |
| C  | 0.019141 | 3.188513 | 1.897462 |
| H  | 0.848227 | 4.497589 | 0.403321 |
| C  | 0.955475 | 0.98195  | 1.856585 |
| C  | 0.089098 | 1.901903 | 2.431809 |
| H  | -0.6598  | 3.931883 | 2.295453 |
| H  | -0.52646 | 1.612899 | 3.275358 |
| N  | 1.705095 | 2.631216 | 0.270722 |
| C  | -4.75567 | -0.75668 | 0.079929 |
| C  | -4.70186 | 0.592404 | -0.05662 |
| H  | -5.48774 | 1.325327 | -0.1076  |
| H  | -5.60233 | -1.41079 | 0.189673 |
| N  | 2.664462 | 0.499359 | 0.178655 |
| C  | 4.718268 | -0.41476 | -0.24485 |
| C  | 4.020786 | 0.793526 | 0.01383  |
| C  | 6.105437 | -0.39358 | -0.43448 |
| C  | 6.774605 | 0.818348 | -0.35113 |
| C  | 6.071388 | 2.007421 | -0.07972 |
| C  | 4.694911 | 2.015295 | 0.105944 |
| H  | 4.153925 | 2.931713 | 0.289083 |

|   |          |          |          |
|---|----------|----------|----------|
| H | 6.615247 | 2.943634 | -0.02247 |
| H | 7.848271 | 0.854459 | -0.49571 |
| H | 6.644334 | -1.31222 | -0.6377  |
| N | -3.3568  | 0.935678 | -0.1814  |
| C | -2.5668  | -0.17051 | -0.12141 |
| C | -2.86946 | 2.260946 | -0.39417 |
| C | -1.87604 | 2.490364 | -1.34321 |
| C | -3.3954  | 3.319475 | 0.343796 |
| C | -1.41592 | 3.787085 | -1.54834 |
| H | -1.46632 | 1.661099 | -1.90413 |
| C | -2.92985 | 4.611707 | 0.120295 |
| H | -4.14959 | 3.131832 | 1.099401 |
| C | -1.93095 | 4.866844 | -0.82566 |
| H | -0.63444 | 3.955863 | -2.28091 |
| H | -3.34185 | 5.431185 | 0.700156 |
| C | -1.39476 | 6.263001 | -1.02262 |
| H | -2.19031 | 7.010078 | -0.96443 |
| H | -0.66025 | 6.50899  | -0.24731 |
| H | -0.89838 | 6.368083 | -1.98938 |
| H | 1.078196 | -0.0108  | 2.264519 |

Pt-Iso

|    |          |          |          |
|----|----------|----------|----------|
| C  | -2.55764 | -2.09443 | -0.1079  |
| C  | -2.39494 | -3.46486 | -0.04373 |
| C  | -3.84197 | -1.57692 | 0.105746 |
| N  | -3.89231 | -0.1565  | -0.05168 |
| C  | -3.47159 | -4.31992 | 0.242099 |
| C  | -4.93299 | -2.3774  | 0.398075 |
| C  | -4.72488 | -3.76662 | 0.466944 |
| H  | -3.31391 | -5.39147 | 0.283043 |
| H  | -5.92455 | -1.96983 | 0.560708 |
| H  | -5.56212 | -4.41676 | 0.691938 |
| Pt | -1.06471 | -0.70673 | -0.47264 |
| C  | 0.376836 | -2.12904 | -0.36048 |
| C  | 0.051684 | -3.52572 | -0.4142  |
| C  | 1.776357 | -1.90357 | -0.30302 |
| C  | 1.015341 | -4.54462 | -0.60584 |
| C  | 2.74736  | -2.89715 | -0.49691 |
| C  | 2.353065 | -4.23529 | -0.67497 |
| H  | 0.66549  | -5.5661  | -0.68398 |

|   |          |          |          |
|---|----------|----------|----------|
| H | 3.092026 | -5.01284 | -0.83039 |
| O | -1.19396 | -4.07886 | -0.28488 |
| C | 1.229207 | 2.667982 | 0.30674  |
| C | 1.760743 | 0.464518 | 0.421227 |
| C | 0.461963 | 2.608729 | 1.461431 |
| H | 1.326964 | 3.603494 | -0.23221 |
| C | 1.044752 | 0.310492 | 1.616543 |
| C | 0.361684 | 1.396248 | 2.154212 |
| H | -0.04869 | 3.499323 | 1.80429  |
| H | 1.019031 | -0.6579  | 2.098882 |
| N | 1.865346 | 1.618239 | -0.22592 |
| C | -4.95186 | 0.72308  | 0.062988 |
| C | -4.46755 | 1.954916 | -0.23543 |
| H | -4.96376 | 2.907039 | -0.30228 |
| H | -5.94727 | 0.412383 | 0.326322 |
| N | 2.440071 | -0.67224 | -0.11344 |
| C | 4.033058 | -2.27033 | -0.45836 |
| C | 3.831977 | -0.88245 | -0.19485 |
| C | 5.314149 | -2.81106 | -0.60211 |
| C | 6.398505 | -1.96759 | -0.4636  |
| C | 6.199717 | -0.60656 | -0.18147 |
| C | 4.944074 | -0.01479 | -0.03394 |
| H | 7.077709 | 0.016992 | -0.07695 |
| H | 7.408428 | -2.34771 | -0.56743 |
| H | 5.442213 | -3.86712 | -0.81047 |
| N | -3.11277 | 1.800323 | -0.5238  |
| C | -2.73556 | 0.497609 | -0.40488 |
| C | -2.24818 | 2.851882 | -0.95096 |
| C | -1.35301 | 2.629155 | -1.99723 |
| C | -2.30605 | 4.094681 | -0.32841 |
| C | -0.52506 | 3.662801 | -2.41632 |
| H | -1.3039  | 1.653438 | -2.46209 |
| C | -1.47186 | 5.123064 | -0.76416 |
| H | -2.98231 | 4.25519  | 0.50337  |
| C | -0.56938 | 4.925557 | -1.81252 |
| H | 0.17535  | 3.479586 | -3.22404 |
| H | -1.51962 | 6.088387 | -0.27145 |
| C | 0.360872 | 6.023325 | -2.26612 |
| H | 0.08254  | 6.988821 | -1.83891 |
| H | 1.392055 | 5.809285 | -1.96498 |

|   |          |          |          |
|---|----------|----------|----------|
| H | 0.357068 | 6.119949 | -3.35514 |
| C | 4.840595 | 1.463618 | 0.315377 |
| C | 6.055127 | 2.300415 | -0.11365 |
| C | 4.579359 | 1.650832 | 1.823504 |
| H | 3.981414 | 1.857675 | -0.22466 |
| H | 6.29381  | 2.150708 | -1.16975 |
| H | 5.833796 | 3.361015 | 0.036564 |
| H | 6.949312 | 2.073478 | 0.474948 |
| H | 3.688084 | 1.113566 | 2.152516 |
| H | 5.428699 | 1.280237 | 2.406345 |
| H | 4.438074 | 2.710144 | 2.059192 |
| C | -0.50218 | 1.232937 | 3.389646 |
| C | -1.98498 | 1.115493 | 2.985227 |
| C | -0.29225 | 2.356374 | 4.416401 |
| H | -0.21302 | 0.287638 | 3.862113 |
| H | -2.14    | 0.273075 | 2.309035 |
| H | -2.61285 | 0.975116 | 3.86996  |
| H | -2.31691 | 2.022626 | 2.470704 |
| H | 0.761488 | 2.45352  | 4.689842 |
| H | -0.63034 | 3.321395 | 4.027892 |
| H | -0.8646  | 2.15021  | 5.32501  |

Pt-HB-ref

|    |          |          |          |
|----|----------|----------|----------|
| C  | 1.966413 | -1.78862 | 0.067969 |
| C  | 3.33447  | -1.61761 | -0.02597 |
| C  | 1.493095 | -3.07844 | 0.346167 |
| N  | 0.066165 | -3.15142 | 0.347474 |
| C  | 4.229933 | -2.67987 | 0.179315 |
| C  | 2.334267 | -4.15702 | 0.557736 |
| C  | 3.72078  | -3.93565 | 0.476074 |
| H  | 5.297017 | -2.50834 | 0.098645 |
| H  | 1.957591 | -5.15045 | 0.773887 |
| H  | 4.400581 | -4.76375 | 0.637924 |
| Pt | 0.530736 | -0.31646 | -0.09452 |
| C  | 1.948073 | 1.128594 | -0.26854 |
| C  | 3.321996 | 0.800852 | -0.53091 |
| C  | 1.716633 | 2.519    | -0.33464 |
| C  | 4.276232 | 1.737855 | -1.00622 |
| C  | 2.626665 | 3.46573  | -0.8654  |
| C  | 3.930445 | 3.049255 | -1.21232 |

|   |          |          |          |
|---|----------|----------|----------|
| H | 5.276015 | 1.377357 | -1.21302 |
| H | 4.647252 | 3.757185 | -1.61215 |
| O | 3.908095 | -0.41965 | -0.36723 |
| C | -2.69647 | 3.236827 | 1.442791 |
| C | -0.53243 | 2.857491 | 0.811104 |
| C | -2.59663 | 2.377288 | 2.529556 |
| H | -3.62198 | 3.766612 | 1.236903 |
| C | -0.31435 | 1.981156 | 1.887157 |
| C | -1.37221 | 1.747101 | 2.758505 |
| H | -3.44574 | 2.216903 | 3.182688 |
| H | -1.2368  | 1.085131 | 3.605602 |
| N | -1.68721 | 3.476722 | 0.592693 |
| C | -0.76757 | -4.24692 | 0.465766 |
| C | -2.03008 | -3.79324 | 0.27289  |
| H | -2.97296 | -4.30977 | 0.304203 |
| H | -0.4093  | -5.2377  | 0.681238 |
| N | 0.531925 | 3.227959 | -0.05054 |
| C | 1.960481 | 4.71998  | -0.95392 |
| C | 0.698245 | 4.541174 | -0.44648 |
| N | -1.94173 | -2.42196 | 0.037968 |
| C | -0.64535 | -2.00322 | 0.087202 |
| C | -3.05459 | -1.60041 | -0.32361 |
| C | -4.02694 | -2.10864 | -1.1825  |
| C | -3.15882 | -0.29887 | 0.162033 |
| C | -5.11285 | -1.31511 | -1.54498 |
| H | -3.92687 | -3.10841 | -1.58823 |
| C | -4.24259 | 0.483222 | -0.22032 |
| H | -2.39694 | 0.094268 | 0.820138 |
| C | -5.23709 | -0.00555 | -1.07464 |
| H | -5.86277 | -1.71964 | -2.21646 |
| H | -4.31225 | 1.49597  | 0.157793 |
| C | -6.38806 | 0.873642 | -1.49765 |
| H | -6.7487  | 1.482922 | -0.66487 |
| H | -6.07964 | 1.559699 | -2.29365 |
| H | -7.22632 | 0.283855 | -1.87495 |
| H | -0.1023  | 5.244153 | -0.29109 |
| H | 2.361929 | 5.646271 | -1.33525 |
| H | 0.665699 | 1.569444 | 2.07098  |

HB

|    |          |          |          |
|----|----------|----------|----------|
| C  | 2.101157 | -1.73664 | -0.0461  |
| C  | 3.460059 | -1.48337 | -0.07874 |
| C  | 1.685464 | -3.05941 | 0.168282 |
| N  | 0.263057 | -3.19874 | 0.15486  |
| C  | 4.403362 | -2.50933 | 0.092353 |
| C  | 2.577221 | -4.10029 | 0.356153 |
| C  | 3.951557 | -3.80277 | 0.311969 |
| H  | 5.462067 | -2.28166 | 0.051404 |
| H  | 2.250172 | -5.11898 | 0.531376 |
| H  | 4.670072 | -4.60171 | 0.45153  |
| Pt | 0.587897 | -0.32863 | -0.18171 |
| C  | 1.927504 | 1.186529 | -0.22771 |
| C  | 3.331506 | 0.967501 | -0.37765 |
| C  | 1.607838 | 2.569868 | -0.22586 |
| C  | 4.266955 | 2.008045 | -0.63751 |
| C  | 2.510995 | 3.621084 | -0.48997 |
| C  | 3.871174 | 3.319629 | -0.71488 |
| H  | 5.303299 | 1.725327 | -0.77233 |
| H  | 4.589415 | 4.103832 | -0.92383 |
| O  | 3.977897 | -0.23254 | -0.29845 |
| C  | -3.10547 | 2.502464 | 0.255964 |
| C  | -0.83838 | 2.63169  | 0.481676 |
| C  | -3.24385 | 1.842861 | 1.474454 |
| H  | -3.97246 | 2.729183 | -0.35523 |
| C  | -0.86388 | 1.981509 | 1.733094 |
| C  | -2.10398 | 1.581675 | 2.222903 |
| H  | -4.22141 | 1.533618 | 1.82326  |
| H  | -2.14293 | 1.072745 | 3.178056 |
| N  | -1.92656 | 2.889339 | -0.22982 |
| C  | -0.53108 | -4.32218 | 0.278229 |
| C  | -1.81633 | -3.90533 | 0.145641 |
| H  | -2.73843 | -4.45958 | 0.143891 |
| H  | -0.13328 | -5.30945 | 0.43207  |
| N  | 0.386448 | 3.180921 | -0.01062 |
| C  | 1.729316 | 4.801662 | -0.43653 |
| N  | -1.77946 | -2.52776 | -0.05374 |
| C  | -0.49901 | -2.07075 | -0.04054 |
| C  | -2.92285 | -1.71061 | -0.30882 |
| C  | -2.89224 | -0.7884  | -1.35257 |
| C  | -4.06688 | -1.85431 | 0.471913 |

|   |          |          |          |
|---|----------|----------|----------|
| C | -4.01783 | -0.01405 | -1.60997 |
| H | -1.99657 | -0.68167 | -1.95013 |
| C | -5.1872  | -1.07494 | 0.197069 |
| H | -4.07535 | -2.55694 | 1.297202 |
| C | -5.18084 | -0.14133 | -0.84426 |
| H | -3.98384 | 0.707935 | -2.41822 |
| H | -6.07459 | -1.18796 | 0.810996 |
| C | -6.37578 | 0.742222 | -1.10048 |
| H | -7.3096  | 0.246211 | -0.82617 |
| H | -6.30831 | 1.663268 | -0.51006 |
| H | -6.43941 | 1.033655 | -2.15111 |
| H | 2.034494 | 5.826797 | -0.58893 |
| O | 0.229    | 1.776542 | 2.51387  |
| H | 1.009258 | 1.613656 | 1.964356 |
| N | 0.470123 | 4.531211 | -0.1359  |
